# Supplementary material for: ENACT (ENvironmental enrichment for infants; parenting with Acceptance and Commitment Therapy): a randomised controlled trial of an innovative intervention for infants at risk of autism spectrum disorder
Source: PubMed Central journal article supplement — BMJ Open. 2020 Aug 20;10(8):e034315. doi: 10.1136/bmjopen-2019-034315 (PMC7440709; doi:10.1136/bmjopen-2019-034315), 2020-08-20
Supplement: bmjopen-2019-034315.draft_revisions.pdf [file bmjopen-2019-034315.draft_revisions.pdf]

# BMJ Open

BMJ Open is committed to open peer review. As part of this commitment we make the peer review history of every article we publish publicly available.

When an article is published we post the peer reviewers' comments and the authors' responses online. We also post the versions of the paper that were used during peer review. These are the versions that the peer review comments apply to.

The versions of the paper that follow are the versions that were submitted during the peer review process. They are not the versions of record or the final published versions. They should not be cited or distributed as the published version of this manuscript.

BMJ Open is an open access journal and the full, final, typeset and author-corrected version of record of the manuscript is available on our site with no access controls, subscription charges or pay-per-view fees (<http://bmjopen.bmj.com>).

If you have any questions on BMJ Open's open peer review process please email [info.bmjopen@bmj.com](mailto:info.bmjopen@bmj.com)

# BMJ Open

## **ENACT (ENvironmental enrichment for infants; parenting with Acceptance and Commitment Therapy): A randomised controlled trial of an innovative intervention for infants at risk of Autism Spectrum Disorder**

|                               |                                                                                                                                                                                                                                                                                                                                                                                                                                                                                                                                                                                                                                                                                                                                                                                                                                |
|-------------------------------|--------------------------------------------------------------------------------------------------------------------------------------------------------------------------------------------------------------------------------------------------------------------------------------------------------------------------------------------------------------------------------------------------------------------------------------------------------------------------------------------------------------------------------------------------------------------------------------------------------------------------------------------------------------------------------------------------------------------------------------------------------------------------------------------------------------------------------|
| Journal:                      | <i>BMJ Open</i>                                                                                                                                                                                                                                                                                                                                                                                                                                                                                                                                                                                                                                                                                                                                                                                                                |
| Manuscript ID                 | bmjopen-2019-034315                                                                                                                                                                                                                                                                                                                                                                                                                                                                                                                                                                                                                                                                                                                                                                                                            |
| Article Type:                 | Protocol                                                                                                                                                                                                                                                                                                                                                                                                                                                                                                                                                                                                                                                                                                                                                                                                                       |
| Date Submitted by the Author: | 14-Sep-2019                                                                                                                                                                                                                                                                                                                                                                                                                                                                                                                                                                                                                                                                                                                                                                                                                    |
| Complete List of Authors:     | Whittingham, Koa; The University of Queensland, Queensland Cerebral palsy Research centre; The University of Queensland<br>McGlade, Andrea; The University of Queensland, Queensland Cerebral Palsy and Rehabilitation Research Centre, UQ Child Health Research Centre, Faculty of Medicine<br>Kulasinghe, Kavindri; The University of Queensland, Queensland Cerebral Palsy and Rehabilitation Research Centre, UQ Child Health Research Centre, Faculty of Medicine<br>Mitchell , AE ; University of Queensland, Parenting and Family Support Centre, School of Psychology<br>Heussler, Honey; Mater Medical Research Institute<br>Boyd, Roslyn; The University of Queensland, Queensland Cerebral Palsy and Rehabilitation Research Centre; The University of Queensland, Queensland Children's Medical Research Institute |
| Keywords:                     | Autism Spectrum Disorder, early intervention, maternal mental health, parent-infant interaction, infant development                                                                                                                                                                                                                                                                                                                                                                                                                                                                                                                                                                                                                                                                                                            |
|                               |                                                                                                                                                                                                                                                                                                                                                                                                                                                                                                                                                                                                                                                                                                                                                                                                                                |

SCHOLARONE™  
Manuscripts

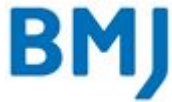

I, the Submitting Author has the right to grant and does grant on behalf of all authors of the Work (as defined in the below author licence), an exclusive licence and/or a non-exclusive licence for contributions from authors who are: i) UK Crown employees; ii) where BMJ has agreed a CC-BY licence shall apply, and/or iii) in accordance with the terms applicable for US Federal Government officers or employees acting as part of their official duties; on a worldwide, perpetual, irrevocable, royalty-free basis to BMJ Publishing Group Ltd ("BMJ") its licensees and where the relevant Journal is co-owned by BMJ to the co-owners of the Journal, to publish the Work in this journal and any other BMJ products and to exploit all rights, as set out in our [licence](#).

The Submitting Author accepts and understands that any supply made under these terms is made by BMJ to the Submitting Author unless you are acting as an employee on behalf of your employer or a postgraduate student of an affiliated institution which is paying any applicable article publishing charge ("APC") for Open Access articles. Where the Submitting Author wishes to make the Work available on an Open Access basis (and intends to pay the relevant APC), the terms of reuse of such Open Access shall be governed by a Creative Commons licence – details of these licences and which [Creative Commons](#) licence will apply to this Work are set out in our licence referred to above.

Other than as permitted in any relevant BMJ Author's Self Archiving Policies, I confirm this Work has not been accepted for publication elsewhere, is not being considered for publication elsewhere and does not duplicate material already published. I confirm all authors consent to publication of this Work and authorise the granting of this licence.

# Reporting checklist for protocol of a clinical trial.

Based on the SPIRIT guidelines.

## Instructions to authors

Complete this checklist by entering the page numbers from your manuscript where readers will find each of the items listed below.

Your article may not currently address all the items on the checklist. Please modify your text to include the missing information. If you are certain that an item does not apply, please write "n/a" and provide a short explanation.

Upload your completed checklist as an extra file when you submit to a journal.

In your methods section, say that you used the SPIRIT reporting guidelines, and cite them as:

Chan A-W, Tetzlaff JM, Altman DG, Laupacis A, Gøtzsche PC, Krleža-Jerić K, Hróbjartsson A, Mann H, Dickersin K, Berlin J, Doré C, Parulekar W, Summerskill W, Groves T, Schulz K, Sox H, Rockhold FW, Rennie D, Moher D. SPIRIT 2013 Statement: Defining standard protocol items for clinical trials. *Ann Intern Med.* 2013;158(3):200-207

|                                             |                     |                                                                                                              | Page<br>Number |
|---------------------------------------------|---------------------|--------------------------------------------------------------------------------------------------------------|----------------|
| <b>Administrative information</b>           |                     |                                                                                                              |                |
| Title                                       | <a href="#">#1</a>  | Descriptive title identifying the study design, population, interventions, and, if applicable, trial acronym | Title<br>page  |
| Trial registration                          | <a href="#">#2a</a> | Trial identifier and registry name. If not yet registered, name of intended registry                         | Title<br>page  |
| Trial registration: data set                | <a href="#">#2b</a> | All items from the World Health Organization Trial Registration Data Set                                     | Title<br>page  |
| Protocol version                            | <a href="#">#3</a>  | Date and version identifier                                                                                  | N/A            |
| Funding                                     | <a href="#">#4</a>  | Sources and types of financial, material, and other support                                                  | 15             |
| Roles and responsibilities: contributorship | <a href="#">#5a</a> | Names, affiliations, and roles of protocol contributors                                                      | Title<br>page  |

|    |                               |                      |                                                                                                |      |
|----|-------------------------------|----------------------|------------------------------------------------------------------------------------------------|------|
| 1  | Roles and                     | <a href="#">#5b</a>  | Name and contact information for the trial sponsor                                             | N/A  |
| 2  | responsibilities: sponsor     |                      |                                                                                                |      |
| 3  | contact information           |                      |                                                                                                |      |
| 4  |                               |                      |                                                                                                |      |
| 5  |                               |                      |                                                                                                |      |
| 6  | Roles and                     | <a href="#">#5c</a>  | Role of study sponsor and funders, if any, in study design; collection, management,            | N/A  |
| 7  | responsibilities: sponsor     |                      | analysis, and interpretation of data; writing of the report; and the decision to submit the    |      |
| 8  | and funder                    |                      | report for publication, including whether they will have ultimate authority over any of        |      |
| 9  |                               |                      | these activities                                                                               |      |
| 10 |                               |                      |                                                                                                |      |
| 11 |                               |                      |                                                                                                |      |
| 12 |                               |                      |                                                                                                |      |
| 13 | Roles and                     | <a href="#">#5d</a>  | Composition, roles, and responsibilities of the coordinating centre, steering committee,       | 15   |
| 14 | responsibilities:             |                      | endpoint adjudication committee, data management team, and other individuals or                |      |
| 15 | committees                    |                      | groups overseeing the trial, if applicable (see Item 21a for data monitoring committee)        |      |
| 16 |                               |                      |                                                                                                |      |
| 17 |                               |                      |                                                                                                |      |
| 18 |                               |                      |                                                                                                |      |
| 19 | <b>Introduction</b>           |                      |                                                                                                |      |
| 20 |                               |                      |                                                                                                |      |
| 21 | Background and                | <a href="#">#6a</a>  | Description of research question and justification for undertaking the trial, including        | 5-6  |
| 22 | rationale                     |                      | summary of relevant studies (published and unpublished) examining benefits and harms           |      |
| 23 |                               |                      | for each intervention                                                                          |      |
| 24 |                               |                      |                                                                                                |      |
| 25 |                               |                      |                                                                                                |      |
| 26 | Background and                | <a href="#">#6b</a>  | Explanation for choice of comparators                                                          | 6    |
| 27 | rationale: choice of          |                      |                                                                                                |      |
| 28 | comparators                   |                      |                                                                                                |      |
| 29 |                               |                      |                                                                                                |      |
| 30 |                               |                      |                                                                                                |      |
| 31 |                               |                      |                                                                                                |      |
| 32 | Objectives                    | <a href="#">#7</a>   | Specific objectives or hypotheses                                                              | 6-7  |
| 33 |                               |                      |                                                                                                |      |
| 34 | Trial design                  | <a href="#">#8</a>   | Description of trial design including type of trial (eg, parallel group, crossover, factorial, | 6-7  |
| 35 |                               |                      | single group), allocation ratio, and framework (eg, superiority, equivalence, non-             |      |
| 36 |                               |                      | inferiority, exploratory)                                                                      |      |
| 37 |                               |                      |                                                                                                |      |
| 38 |                               |                      |                                                                                                |      |
| 39 |                               |                      |                                                                                                |      |
| 40 | <b>Methods: Participants,</b> |                      |                                                                                                |      |
| 41 | <b>interventions, and</b>     |                      |                                                                                                |      |
| 42 | <b>outcomes</b>               |                      |                                                                                                |      |
| 43 |                               |                      |                                                                                                |      |
| 44 |                               |                      |                                                                                                |      |
| 45 | Study setting                 | <a href="#">#9</a>   | Description of study settings (eg, community clinic, academic hospital) and list of            | 8-9  |
| 46 |                               |                      | countries where data will be collected. Reference to where list of study sites can be          |      |
| 47 |                               |                      | obtained                                                                                       |      |
| 48 |                               |                      |                                                                                                |      |
| 49 |                               |                      |                                                                                                |      |
| 50 |                               |                      |                                                                                                |      |
| 51 | Eligibility criteria          | <a href="#">#10</a>  | Inclusion and exclusion criteria for participants. If applicable, eligibility criteria for     | 8    |
| 52 |                               |                      | study centres and individuals who will perform the interventions (eg, surgeons,                |      |
| 53 |                               |                      | psychotherapists)                                                                              |      |
| 54 |                               |                      |                                                                                                |      |
| 55 |                               |                      |                                                                                                |      |
| 56 | Interventions:                | <a href="#">#11a</a> | Interventions for each group with sufficient detail to allow replication, including how        | 9-10 |
| 57 | description                   |                      | and when they will be administered                                                             |      |
| 58 |                               |                      |                                                                                                |      |
| 59 |                               |                      |                                                                                                |      |
| 60 |                               |                      |                                                                                                |      |

|    |                              |                      |                                                                                             |          |
|----|------------------------------|----------------------|---------------------------------------------------------------------------------------------|----------|
| 1  | Interventions:               | <a href="#">#11b</a> | Criteria for discontinuing or modifying allocated interventions for a given trial           | N/A      |
| 2  | modifications                |                      | participant (eg, drug dose change in response to harms, participant request, or improving   |          |
| 3  |                              |                      | / worsening disease)                                                                        |          |
| 4  |                              |                      |                                                                                             |          |
| 5  |                              |                      |                                                                                             |          |
| 6  | Interventions: adherence     | <a href="#">#11c</a> | Strategies to improve adherence to intervention protocols, and any procedures for           | 10       |
| 7  |                              |                      | monitoring adherence (eg, drug tablet return; laboratory tests)                             |          |
| 8  |                              |                      |                                                                                             |          |
| 9  |                              |                      |                                                                                             |          |
| 10 | Interventions:               | <a href="#">#11d</a> | Relevant concomitant care and interventions that are permitted or prohibited during the     | 9        |
| 11 | concomitant care             |                      | trial                                                                                       |          |
| 12 |                              |                      |                                                                                             |          |
| 13 |                              |                      |                                                                                             |          |
| 14 | Outcomes                     | <a href="#">#12</a>  | Primary, secondary, and other outcomes, including the specific measurement variable         | 11-14    |
| 15 |                              |                      | (eg, systolic blood pressure), analysis metric (eg, change from baseline, final value, time |          |
| 16 |                              |                      | to event), method of aggregation (eg, median, proportion), and time point for each          |          |
| 17 |                              |                      | outcome. Explanation of the clinical relevance of chosen efficacy and harm outcomes is      |          |
| 18 |                              |                      | strongly recommended                                                                        |          |
| 19 |                              |                      |                                                                                             |          |
| 20 |                              |                      |                                                                                             |          |
| 21 |                              |                      |                                                                                             |          |
| 22 | Participant timeline         | <a href="#">#13</a>  | Time schedule of enrolment, interventions (including any run-ins and washouts),             | 17,      |
| 23 |                              |                      | assessments, and visits for participants. A schematic diagram is highly recommended         | figure 1 |
| 24 |                              |                      | (see Figure)                                                                                |          |
| 25 |                              |                      |                                                                                             |          |
| 26 |                              |                      |                                                                                             |          |
| 27 |                              |                      |                                                                                             |          |
| 28 | Sample size                  | <a href="#">#14</a>  | Estimated number of participants needed to achieve study objectives and how it was          | 8        |
| 29 |                              |                      | determined, including clinical and statistical assumptions supporting any sample size       |          |
| 30 |                              |                      | calculations                                                                                |          |
| 31 |                              |                      |                                                                                             |          |
| 32 |                              |                      |                                                                                             |          |
| 33 | Recruitment                  | <a href="#">#15</a>  | Strategies for achieving adequate participant enrolment to reach target sample size         | 8        |
| 34 |                              |                      |                                                                                             |          |
| 35 |                              |                      |                                                                                             |          |
| 36 | <b>Methods: Assignment</b>   |                      |                                                                                             |          |
| 37 | <b>of interventions (for</b> |                      |                                                                                             |          |
| 38 | <b>controlled trials)</b>    |                      |                                                                                             |          |
| 39 |                              |                      |                                                                                             |          |
| 40 |                              |                      |                                                                                             |          |
| 41 | Allocation: sequence         | <a href="#">#16a</a> | Method of generating the allocation sequence (eg, computer-generated random                 | 10-11    |
| 42 | generation                   |                      | numbers), and list of any factors for stratification. To reduce predictability of a random  |          |
| 43 |                              |                      | sequence, details of any planned restriction (eg, blocking) should be provided in a         |          |
| 44 |                              |                      | separate document that is unavailable to those who enrol participants or assign             |          |
| 45 |                              |                      | interventions                                                                               |          |
| 46 |                              |                      |                                                                                             |          |
| 47 |                              |                      |                                                                                             |          |
| 48 |                              |                      |                                                                                             |          |
| 49 |                              |                      |                                                                                             |          |
| 50 |                              | <a href="#">#16b</a> | Mechanism of implementing the allocation sequence (eg, central telephone; sequentially      | 10-11    |
| 51 |                              |                      | numbered, opaque, sealed envelopes), describing any steps to conceal the sequence until     |          |
| 52 |                              |                      | interventions are assigned                                                                  |          |
| 53 |                              |                      |                                                                                             |          |
| 54 |                              |                      |                                                                                             |          |
| 55 | Allocation:                  | <a href="#">#16c</a> | Who will generate the allocation sequence, who will enrol participants, and who will        | 10-11    |
| 56 | implementation               |                      | assign participants to interventions                                                        |          |
| 57 |                              |                      |                                                                                             |          |
| 58 |                              |                      |                                                                                             |          |
| 59 |                              |                      |                                                                                             |          |
| 60 |                              |                      |                                                                                             |          |

|    |                            |                      |                                                                                                                                                                                                                                                                                                                                                                                                              |       |
|----|----------------------------|----------------------|--------------------------------------------------------------------------------------------------------------------------------------------------------------------------------------------------------------------------------------------------------------------------------------------------------------------------------------------------------------------------------------------------------------|-------|
| 1  | Blinding (masking)         | <a href="#">#17a</a> | Who will be blinded after assignment to interventions (eg, trial participants, care providers, outcome assessors, data analysts), and how                                                                                                                                                                                                                                                                    | N/A   |
| 2  |                            |                      |                                                                                                                                                                                                                                                                                                                                                                                                              |       |
| 3  |                            |                      |                                                                                                                                                                                                                                                                                                                                                                                                              |       |
| 4  | Blinding (masking):        | <a href="#">#17b</a> | If blinded, circumstances under which unblinding is permissible, and procedure for                                                                                                                                                                                                                                                                                                                           | N/A   |
| 5  | emergency unblinding       |                      | revealing a participant's allocated intervention during the trial                                                                                                                                                                                                                                                                                                                                            |       |
| 6  |                            |                      |                                                                                                                                                                                                                                                                                                                                                                                                              |       |
| 7  |                            |                      |                                                                                                                                                                                                                                                                                                                                                                                                              |       |
| 8  |                            |                      |                                                                                                                                                                                                                                                                                                                                                                                                              |       |
| 9  | <b>Methods: Data</b>       |                      |                                                                                                                                                                                                                                                                                                                                                                                                              |       |
| 10 | <b>collection,</b>         |                      |                                                                                                                                                                                                                                                                                                                                                                                                              |       |
| 11 | <b>management, and</b>     |                      |                                                                                                                                                                                                                                                                                                                                                                                                              |       |
| 12 | <b>analysis</b>            |                      |                                                                                                                                                                                                                                                                                                                                                                                                              |       |
| 13 |                            |                      |                                                                                                                                                                                                                                                                                                                                                                                                              |       |
| 14 |                            |                      |                                                                                                                                                                                                                                                                                                                                                                                                              |       |
| 15 | Data collection plan       | <a href="#">#18a</a> | Plans for assessment and collection of outcome, baseline, and other trial data, including any related processes to promote data quality (eg, duplicate measurements, training of assessors) and a description of study instruments (eg, questionnaires, laboratory tests) along with their reliability and validity, if known. Reference to where data collection forms can be found, if not in the protocol | 11-14 |
| 16 |                            |                      |                                                                                                                                                                                                                                                                                                                                                                                                              |       |
| 17 |                            |                      |                                                                                                                                                                                                                                                                                                                                                                                                              |       |
| 18 |                            |                      |                                                                                                                                                                                                                                                                                                                                                                                                              |       |
| 19 |                            |                      |                                                                                                                                                                                                                                                                                                                                                                                                              |       |
| 20 |                            |                      |                                                                                                                                                                                                                                                                                                                                                                                                              |       |
| 21 |                            |                      |                                                                                                                                                                                                                                                                                                                                                                                                              |       |
| 22 |                            |                      |                                                                                                                                                                                                                                                                                                                                                                                                              |       |
| 23 |                            |                      |                                                                                                                                                                                                                                                                                                                                                                                                              |       |
| 24 | Data collection plan:      | <a href="#">#18b</a> | Plans to promote participant retention and complete follow-up, including list of any                                                                                                                                                                                                                                                                                                                         | 14    |
| 25 | retention                  |                      | outcome data to be collected for participants who discontinue or deviate from intervention protocols                                                                                                                                                                                                                                                                                                         |       |
| 26 |                            |                      |                                                                                                                                                                                                                                                                                                                                                                                                              |       |
| 27 |                            |                      |                                                                                                                                                                                                                                                                                                                                                                                                              |       |
| 28 |                            |                      |                                                                                                                                                                                                                                                                                                                                                                                                              |       |
| 29 | Data management            | <a href="#">#19</a>  | Plans for data entry, coding, security, and storage, including any related processes to promote data quality (eg, double data entry; range checks for data values). Reference to where details of data management procedures can be found, if not in the protocol                                                                                                                                            | 14    |
| 30 |                            |                      |                                                                                                                                                                                                                                                                                                                                                                                                              |       |
| 31 |                            |                      |                                                                                                                                                                                                                                                                                                                                                                                                              |       |
| 32 |                            |                      |                                                                                                                                                                                                                                                                                                                                                                                                              |       |
| 33 |                            |                      |                                                                                                                                                                                                                                                                                                                                                                                                              |       |
| 34 |                            |                      |                                                                                                                                                                                                                                                                                                                                                                                                              |       |
| 35 | Statistics: outcomes       | <a href="#">#20a</a> | Statistical methods for analysing primary and secondary outcomes. Reference to where other details of the statistical analysis plan can be found, if not in the protocol                                                                                                                                                                                                                                     | 15    |
| 36 |                            |                      |                                                                                                                                                                                                                                                                                                                                                                                                              |       |
| 37 |                            |                      |                                                                                                                                                                                                                                                                                                                                                                                                              |       |
| 38 |                            |                      |                                                                                                                                                                                                                                                                                                                                                                                                              |       |
| 39 | Statistics: additional     | <a href="#">#20b</a> | Methods for any additional analyses (eg, subgroup and adjusted analyses)                                                                                                                                                                                                                                                                                                                                     | N/A   |
| 40 | analyses                   |                      |                                                                                                                                                                                                                                                                                                                                                                                                              |       |
| 41 |                            |                      |                                                                                                                                                                                                                                                                                                                                                                                                              |       |
| 42 |                            |                      |                                                                                                                                                                                                                                                                                                                                                                                                              |       |
| 43 | Statistics: analysis       | <a href="#">#20c</a> | Definition of analysis population relating to protocol non-adherence (eg, as randomised analysis), and any statistical methods to handle missing data (eg, multiple imputation)                                                                                                                                                                                                                              | N/A   |
| 44 | population and missing     |                      |                                                                                                                                                                                                                                                                                                                                                                                                              |       |
| 45 | data                       |                      |                                                                                                                                                                                                                                                                                                                                                                                                              |       |
| 46 |                            |                      |                                                                                                                                                                                                                                                                                                                                                                                                              |       |
| 47 |                            |                      |                                                                                                                                                                                                                                                                                                                                                                                                              |       |
| 48 | <b>Methods: Monitoring</b> |                      |                                                                                                                                                                                                                                                                                                                                                                                                              |       |
| 49 |                            |                      |                                                                                                                                                                                                                                                                                                                                                                                                              |       |
| 50 | Data monitoring: formal    | <a href="#">#21a</a> | Composition of data monitoring committee (DMC); summary of its role and reporting structure; statement of whether it is independent from the sponsor and competing interests; and reference to where further details about its charter can be found, if not in the protocol. Alternatively, an explanation of why a DMC is not needed                                                                        | 15    |
| 51 | committee                  |                      |                                                                                                                                                                                                                                                                                                                                                                                                              |       |
| 52 |                            |                      |                                                                                                                                                                                                                                                                                                                                                                                                              |       |
| 53 |                            |                      |                                                                                                                                                                                                                                                                                                                                                                                                              |       |
| 54 |                            |                      |                                                                                                                                                                                                                                                                                                                                                                                                              |       |
| 55 |                            |                      |                                                                                                                                                                                                                                                                                                                                                                                                              |       |
| 56 |                            |                      |                                                                                                                                                                                                                                                                                                                                                                                                              |       |
| 57 |                            |                      |                                                                                                                                                                                                                                                                                                                                                                                                              |       |
| 58 |                            |                      |                                                                                                                                                                                                                                                                                                                                                                                                              |       |
| 59 |                            |                      |                                                                                                                                                                                                                                                                                                                                                                                                              |       |
| 60 |                            |                      |                                                                                                                                                                                                                                                                                                                                                                                                              |       |

|    |                          |                      |                                                                                             |       |
|----|--------------------------|----------------------|---------------------------------------------------------------------------------------------|-------|
| 1  | Data monitoring: interim | <a href="#">#21b</a> | Description of any interim analyses and stopping guidelines, including who will have        | N/A   |
| 2  | analysis                 |                      | access to these interim results and make the final decision to terminate the trial          |       |
| 3  |                          |                      |                                                                                             |       |
| 4  | Harms                    | <a href="#">#22</a>  | Plans for collecting, assessing, reporting, and managing solicited and spontaneously        | 15    |
| 5  |                          |                      | reported adverse events and other unintended effects of trial interventions or trial        |       |
| 6  |                          |                      | conduct                                                                                     |       |
| 7  |                          |                      |                                                                                             |       |
| 8  |                          |                      |                                                                                             |       |
| 9  |                          |                      |                                                                                             |       |
| 10 | Auditing                 | <a href="#">#23</a>  | Frequency and procedures for auditing trial conduct, if any, and whether the process will   | N/A   |
| 11 |                          |                      | be independent from investigators and the sponsor                                           |       |
| 12 |                          |                      |                                                                                             |       |
| 13 |                          |                      |                                                                                             |       |
| 14 | <b>Ethics and</b>        |                      |                                                                                             |       |
| 15 | <b>dissemination</b>     |                      |                                                                                             |       |
| 16 |                          |                      |                                                                                             |       |
| 17 |                          |                      |                                                                                             |       |
| 18 | Research ethics approval | <a href="#">#24</a>  | Plans for seeking research ethics committee / institutional review board (REC / IRB)        | 15    |
| 19 |                          |                      | approval                                                                                    |       |
| 20 |                          |                      |                                                                                             |       |
| 21 |                          |                      |                                                                                             |       |
| 22 | Protocol amendments      | <a href="#">#25</a>  | Plans for communicating important protocol modifications (eg, changes to eligibility        | N/A   |
| 23 |                          |                      | criteria, outcomes, analyses) to relevant parties (eg, investigators, REC / IRBs, trial     |       |
| 24 |                          |                      | participants, trial registries, journals, regulators)                                       |       |
| 25 |                          |                      |                                                                                             |       |
| 26 |                          |                      |                                                                                             |       |
| 27 | Consent or assent        | <a href="#">#26a</a> | Who will obtain informed consent or assent from potential trial participants or             | 10-11 |
| 28 |                          |                      | authorised surrogates, and how (see Item 32)                                                |       |
| 29 |                          |                      |                                                                                             |       |
| 30 |                          |                      |                                                                                             |       |
| 31 | Consent or assent:       | <a href="#">#26b</a> | Additional consent provisions for collection and use of participant data and biological     | N/A   |
| 32 | ancillary studies        |                      | specimens in ancillary studies, if applicable                                               |       |
| 33 |                          |                      |                                                                                             |       |
| 34 |                          |                      |                                                                                             |       |
| 35 | Confidentiality          | <a href="#">#27</a>  | How personal information about potential and enrolled participants will be collected,       | 15    |
| 36 |                          |                      | shared, and maintained in order to protect confidentiality before, during, and after the    |       |
| 37 |                          |                      | trial                                                                                       |       |
| 38 |                          |                      |                                                                                             |       |
| 39 |                          |                      |                                                                                             |       |
| 40 |                          |                      |                                                                                             |       |
| 41 | Declaration of interests | <a href="#">#28</a>  | Financial and other competing interests for principal investigators for the overall trial   | N/A   |
| 42 |                          |                      | and each study site                                                                         |       |
| 43 |                          |                      |                                                                                             |       |
| 44 |                          |                      |                                                                                             |       |
| 45 | Data access              | <a href="#">#29</a>  | Statement of who will have access to the final trial dataset, and disclosure of contractual | 14    |
| 46 |                          |                      | agreements that limit such access for investigators                                         |       |
| 47 |                          |                      |                                                                                             |       |
| 48 | Ancillary and post trial | <a href="#">#30</a>  | Provisions, if any, for ancillary and post-trial care, and for compensation to those who    | N/A   |
| 49 | care                     |                      | suffer harm from trial participation                                                        |       |
| 50 |                          |                      |                                                                                             |       |
| 51 |                          |                      |                                                                                             |       |
| 52 | Dissemination policy:    | <a href="#">#31a</a> | Plans for investigators and sponsor to communicate trial results to participants,           | 15    |
| 53 | trial results            |                      | healthcare professionals, the public, and other relevant groups (eg, via publication,       |       |
| 54 |                          |                      | reporting in results databases, or other data sharing arrangements), including any          |       |
| 55 |                          |                      | publication restrictions                                                                    |       |
| 56 |                          |                      |                                                                                             |       |
| 57 |                          |                      |                                                                                             |       |
| 58 |                          |                      |                                                                                             |       |
| 59 |                          |                      |                                                                                             |       |
| 60 |                          |                      |                                                                                             |       |



|    |                       |                      |                                                                                                |     |
|----|-----------------------|----------------------|------------------------------------------------------------------------------------------------|-----|
| 1  | Dissemination policy: | <a href="#">#31b</a> | Authorship eligibility guidelines and any intended use of professional writers                 | N/A |
| 2  | authorship            |                      |                                                                                                |     |
| 3  |                       |                      |                                                                                                |     |
| 4  | Dissemination policy: | <a href="#">#31c</a> | Plans, if any, for granting public access to the full protocol, participant-level dataset, and | N/A |
| 5  | reproducible research |                      | statistical code                                                                               |     |
| 6  |                       |                      |                                                                                                |     |
| 7  |                       |                      |                                                                                                |     |
| 8  | <b>Appendices</b>     |                      |                                                                                                |     |
| 9  |                       |                      |                                                                                                |     |
| 10 | Informed consent      | <a href="#">#32</a>  | Model consent form and other related documentation given to participants and                   | N/A |
| 11 | materials             |                      | authorised surrogates                                                                          |     |
| 12 |                       |                      |                                                                                                |     |
| 13 | Biological specimens  | <a href="#">#33</a>  | Plans for collection, laboratory evaluation, and storage of biological specimens for           | N/A |
| 14 |                       |                      | genetic or molecular analysis in the current trial and for future use in ancillary studies, if |     |
| 15 |                       |                      | applicable                                                                                     |     |
| 16 |                       |                      |                                                                                                |     |
| 17 |                       |                      |                                                                                                |     |
| 18 |                       |                      |                                                                                                |     |
| 19 |                       |                      |                                                                                                |     |

20 None The SPIRIT checklist is distributed under the terms of the Creative Commons Attribution License CC-BY-ND 3.0. This checklist  
 21 can be completed online using <https://www.goodreports.org/>, a tool made by the [EQUATOR Network](#) in collaboration with [Penelope.ai](#)  
 22  
 23  
 24  
 25  
 26  
 27  
 28  
 29  
 30  
 31  
 32  
 33  
 34  
 35  
 36  
 37  
 38  
 39  
 40  
 41  
 42  
 43  
 44  
 45  
 46  
 47  
 48  
 49  
 50  
 51  
 52  
 53  
 54  
 55  
 56  
 57  
 58  
 59  
 60

1  
2  
3 **ENACT (ENvironmental enrichment for infants; parenting with Acceptance and Commitment**  
4 **Therapy): A randomised controlled trial of an innovative intervention for infants at risk of**  
5 **Autism Spectrum Disorder**  
6  
7  
8  
9

10 Koa Whittingham<sup>1</sup>, Andrea McGlade<sup>1</sup>, Kavindri Kulasinghe<sup>1</sup>, Amy E. Mitchell<sup>2</sup>, Honey Heussler<sup>3,4</sup>,  
11 & Roslyn N. Boyd<sup>1</sup>

12 <sup>1</sup>Queensland Cerebral Palsy and Rehabilitation Research Centre, Faculty of Medicine, UQ Child  
13 Health Research Centre  
14

15 The University of Queensland, Brisbane, Australia;  
16

17 <sup>2</sup>Parenting and Family Support Centre, School of Psychology, The University of Queensland, Brisbane,  
18 Australia.  
19

20 <sup>3</sup> UQ Child Health Research Centre, Faculty of Medicine, The University of Queensland, Brisbane,  
21 Australia  
22

23 <sup>4</sup>Centre for Clinical Trials in Rare Neurodevelopmental Disorders, Child Development Program, Child  
24 Youth and Community Health Services, Children's Health Queensland, Brisbane, Australia.  
25  
26  
27  
28  
29

30 **Running head:** ENACT (ENvironmental enrichment for infants; parenting with Acceptance and  
31 Commitment Therapy)  
32  
33  
34  
35

36 **Registered with:** Australian New Zealand Clinical Trials Registry (ACTRN12618002046280p)  
37 registered 21/12/2018; Universal Trial Number (U1111-1224-6536)  
38  
39  
40

41 **Acknowledgements:**

42 This work was supported by two University of Queensland Graduate School Scholarships (AM and  
43 KK), a Children's Hospital Foundation Early Career Fellowship (AEM; award ref. no. 50223), an  
44 NHMRC Research Fellowship (RNB; 1105038) and a philanthropic donation.  
45  
46  
47  
48  
49

50 **Declaration of Interest:**

51 None  
52  
53  
54

55 **Address for Correspondence:**

56 Dr Koa Whittingham

57 Queensland Cerebral Palsy and Rehabilitation Research Centre, The University of Queensland  
58 Level 6, Centre for Children's Health Research  
59  
60

1  
2  
3 62 Graham Street

4  
5 South Brisbane 4101

6  
7 Email: [koawhittingham@uq.edu.au](mailto:koawhittingham@uq.edu.au)

8  
9  
10 **Author contributions** All authors contributed to the conception and design of this study. All authors  
11 contributed to drafting and critical revision of the manuscript. All authors approved the final version  
12 of the manuscript to be submitted for publication.  
13  
14  
15  
16  
17  
18  
19  
20  
21  
22  
23  
24  
25  
26  
27  
28  
29  
30  
31  
32  
33  
34  
35  
36  
37  
38  
39  
40  
41  
42  
43  
44  
45  
46  
47  
48  
49  
50  
51  
52  
53  
54  
55  
56  
57  
58  
59  
60

For peer review only

## Abstract

**Introduction:** Autism spectrum disorder (ASD) is a heterogeneous neurodevelopmental condition with impacts on behaviour, cognition, communication, social interaction and family mental health. This paper reports the protocol of a randomised controlled trial (RCT) of a very early intervention ENACT (ENvironmental enrichment for infants; parenting with Acceptance and Commitment Therapy) for families of infants at risk of ASD.

**Methods and analysis:** We aim to recruit 66 mothers of infants at risk of ASD (i.e., infants with a sibling or parent diagnosed with ASD) to this randomised controlled trial (RCT). Families will be randomly assigned to care-as-usual or ENACT. ENACT is a very early intervention, leveraging parent-child interactions to improve early social reciprocity, while supporting parental mental health and the parent-child relationship through Acceptance and Commitment Therapy (ACT). Intervention content is delivered online, supported by consultations with a clinician. Parents will perform the social reciprocity intervention with their child. Assessments at four time points (baseline; 3 months, 6 months and 12 months corrected age) will assess parent-infant interaction, parental mental health, infant development and early ASD markers. Analysis will be by intention to treat using general linear models for RCTs.

**Ethics and dissemination:** This protocol has been approved by the Children's Health Queensland Hospital and Health Service Human Research Ethics Committee (HREC/19/QCHQ/50131) and The University of Queensland (2019000558). If efficacy is demonstrated, the intervention has the potential for wide and accessible dissemination.

**Registration details:** This trial has been registered with the Australian New Zealand Clinical Trials Registry (ACTRN12618002046280p).

## Article Summary

### Strengths and Limitations of this study

- First RCT to test a very early intervention for infants at risk of ASD implemented within the first 6 months of life.
- ENACT combines parent-mediated very early intervention with parental mental health support.
- Assessment includes neurodevelopmental and neurophysiological assessments, as well as observations of parent-child interaction.
- ENACT could, if effective, be widely disseminated at little cost.

1  
2  
3  
4  
5  
6  
7  
8  
9  
10  
11  
12  
13  
14  
15  
16  
17  
18  
19  
20  
21  
22  
23  
24  
25  
26  
27  
28  
29  
30  
31  
32  
33  
34  
35  
36  
37  
38  
39  
40  
41  
42  
43  
44  
45  
46  
47  
48  
49  
50  
51  
52  
53  
54  
55  
56  
57  
58  
59  
60

**Keywords:** Autism Spectrum Disorder, early intervention, maternal mental health, parent-infant interaction, infant development

**Word** **count:** 3871

For peer review only

## INTRODUCTION

### Autism Spectrum Disorder and the Broader Autism Phenotype

Autism spectrum disorder (ASD) is a heterogeneous neurodevelopmental condition defined by difficulties in social communication and interaction, and repetitive, restricted interests and activities<sup>1 2</sup>. It evolves from a complex interaction between genes and environment<sup>3 4</sup>, and has substantial impact on affected individuals, with 65% having a profound or severe activity limitation, needing help or supervision with communication, self-care and/or mobility<sup>5</sup>. Prevalence rates are 0.7% and 1.7-2.5% in Australia and the United States, respectively<sup>5-7</sup>. Diagnosis rests on developmental assessment and behavioural observations with most children 2 years or older at diagnosis<sup>8</sup>.

Infant siblings of children with ASD are at an increased risk of ASD themselves, with prevalence estimates of 18-20% from baby sibling studies<sup>9 10</sup>. A further 25% show elevated scores on the Autism Diagnostic Observation Schedule (ADOS), developmental delays and lower adaptive functioning<sup>11-13</sup>. Prospective sibling studies have identified a range of non-specific markers in infants at high-risk of ASD, including motor delays, poor visual reception, language delays, regulatory difficulties and changes in eye gaze at 6-12 months that precede the appearance of autism-specific features in the second year of life<sup>14-18</sup>. The diversity of early markers precludes a single developmental pathway to ASD and has been called 'the first year puzzle'<sup>19-23</sup>. Non-specific developmental markers may interact leading to increasingly abnormal trajectories of infant development. Visual, motor and regulatory difficulties may impact on emerging attention and emotional regulation<sup>19 24-26</sup>. Differences in visual, motor and regulatory abilities at six months of age correspond in timing with changes in whole-brain functional connectivity on MRI studies<sup>27 28</sup>. At 6 months of age, functional connectivity on diffusion tensor imaging MRI correctly predicted 9 of 11 infants that went on to be diagnosed with ASD at 24 months of age<sup>29</sup>. These findings support the conjecture that the developmental cascade leading to ASD begins early, *within the first six months of life*<sup>28</sup>.

To date, six randomised controlled trials (RCTs) have tested parent-mediated early interventions with infants at risk of ASD implemented in the first 18 months, prior to confirmed ASD diagnosis<sup>30-36</sup>. Only one of these, an RCT of iBASIS-VIPP conducted with 54 infants at high familial risk of ASD recruited at 7-10 months of age has demonstrated sustained reduction of ASD related symptoms, but no change in the diagnostic outcome at 3 years<sup>30 34</sup>. To date, no RCT has commenced with at-risk infants *younger than six months of age*, before earliest ASD markers and commencement of the cascade.

### ASD in the Family Context

Poor maternal mental health contributes to poorer long-term outcomes for infants, including those at risk of ASD<sup>37</sup>. Parents of children with ASD are at increased risk for depression and anxiety<sup>38 39</sup>, both due to parenting challenges and pre-existing histories<sup>40-42</sup>. Parents of infants with ASD are more likely to have an ASD or the Broader Autism Phenotype (BAP)<sup>43-46</sup>. The BAP may include rigidity, aloofness, social and communication difficulties<sup>46</sup>, with increased risk of depressive symptomatology, maladaptive coping and decreased social support<sup>46</sup>.

Mental health difficulties can contribute to reductions in responsive parenting<sup>47</sup>. Responsive parenting— child-directed, contingent, prompt, and appropriate to the child’s needs— is associated with better child outcomes<sup>48 49</sup>. Responsiveness is a dose-control system for environmental enrichment, enabling the child to obtain the necessary ‘experience expectant development’<sup>50 51</sup>. If a child is difficult to read, sends atypical or unclear signals, as in ASD, it is more challenging for parents to cultivate responsive patterns of interaction<sup>52</sup>.

By six months infants at risk of ASD may be showing an atypical style of interaction, with difficulty engaging in eye contact and joint attention<sup>15 26 49 53 54</sup>. Parent behaviour may shift towards intrusive parenting and high intensity approach behaviours in an attempt foster engagement and overcome the emerging social limitations of ASD<sup>49 55</sup>. The shift to directive parenting may impact further on the infant’s social development<sup>49 56</sup>. Importantly, commencing parent focused intervention *prior to six months*, before the shift towards directive parenting, has not been tested.

## **Aim**

To test the efficacy of ENACT (ENvironmental enrichment for infants; parenting with Acceptance and Commitment Therapy) for families of infants at risk of ASD via an RCT comparing ENACT to care-as-usual (CAU). ENACT is a newly-developed, very early intervention that targets infants’ social reciprocity through supported parent-infant interactions, while simultaneously supporting parental mental health and the parent-child relationship. ENACT commences prenatally.

## **Hypotheses**

We predict that families allocated to ENACT will show better outcomes compared to families allocated to CAU in terms of having:

### **Primary outcomes**

- H1: Lower scores for ASD symptomatology at 6 and 12 months of age, as assessed on (a) the AOSI<sup>57 58</sup> and (b) the Gap-Overlap task<sup>59 60</sup>.

- H2: Better scores on measures of parents' mental health as assessed on the Depression Anxiety and Stress Scales (DASS-21) and the Acceptance and Action Questionnaire (AAQ-II)<sup>61 62</sup>.

### *Secondary outcomes*

- H3: Improved parent-infant interaction, with greater emotional availability and parental sensitivity, less parental intrusiveness, and greater child responsiveness, as assessed on the Emotional Availability Scales (EAS) Self-Report and Observed<sup>63</sup>.
- H4: Higher scores on measures of (a) infants' cognitive development, assessed using the Mullen Scales of Early Learning- Early Learning Composite (MSEL-ELC; composite of the sub-domains of Visual Reception [VR], Fine Motor [FM], Receptive Language [RL] and Expressive Language [EL]),<sup>64</sup> and (b) infants' adaptive skills, assessed using the Vineland Adaptive Behaviour Scales Third Edition (VABS-3)<sup>65</sup>.
- H5: Higher scores on measures of infants' (a) motor development (assessed using the Hammersmith Infant Neurological Examination; HINE<sup>66 67</sup>) and (b) fine and gross motor abilities (assessed using the MSEL)<sup>68</sup>.
- H6: Higher scores on measures of infants' visual perceptual skills, assessed on the Visual Reception scores on the MSEL<sup>24</sup>, and on symbolic cluster on the Communication and Symbolic Behaviour Scales – Developmental Profile (CSBS-DP)<sup>69</sup> and with reduced times on the Gap-Overlap task.
- H7: Higher scores on measures of infant language development, assessed by the Receptive Language and Expressive Language domains on the MSEL<sup>70</sup> and CSBS-DP<sup>71</sup>.
- H8: Better scores on parent-report measures of infant regulation – specifically, (a) lower scores for Internalising and Externalising Behaviour, assessed on the Infant-Toddler Social and Emotional Assessment (ITSEA);<sup>72</sup> (b) lower scores on the Dysregulation scales of the ITSEA; (c) better sleep on the Brief Infant Sleep Questionnaire (BISQ);<sup>73</sup> and (d) less cry behaviours on the Crying Pattern Questionnaire (CPQ) at 3 and 6 months of age<sup>74</sup>.

In addition, we will examine General Movements Assessment (GMA) as a predictor, testing the hypothesis that:

- H9: Infants who score as Absent Fidgety or Abnormal Fidgety on the GMA at 3 months of age (optimality scoring) will have a higher score on the AOSI at 12 months of age<sup>75 76</sup> and shorter latencies on the Gap-Overlap task<sup>14</sup>. Normal Fidgety movements on GMA will have a high negative predictive value for infants who do not go on to have ASD.

## **METHODS AND ANALYSIS**

### **Design**



1  
2  
3 The study is an RCT following CONSORT guidelines. After enrolment, and baseline assessments,  
4 mothers of infants at risk of ASD will be randomly allocated to intervention (ENACT) or CAU.  
5 Comparison to CAU is appropriate as ENACT is a newly developed intervention and this is a pilot  
6 trial. The CONSORT flow chart is depicted in Figure One.  
7  
8  
9

10 [insert Figure One about here]  
11  
12

### 13 **Recruitment**

14 Families will be recruited via advertisements distributed through Queensland ASD family support  
15 groups, schools and clinics (e.g. Autism Queensland, AEIOU Foundation for Children with Autism,  
16 AspergerServices Australia, Minds and Hearts) and Queensland Health Antenatal and Child  
17 Development Clinics. Mothers will be recruited during the third trimester of pregnancy.  
18  
19  
20  
21  
22

### 23 **Inclusion criteria**

24 Participants must meet the following inclusion criteria: (1) the infant must have one or more biological  
25 siblings or a biological parent (mother or father) diagnosed with ASD; (2) the mother must agree to  
26 the assessment requirements; (3) the mother must have reliable internet access (e.g. ADSL); and (4)  
27 the mother must have sufficient English to complete assessments.  
28  
29  
30  
31  
32

### 33 **Exclusion criteria**

34 Any infant with known neurological or chromosomal disorder at the point of recruitment.  
35  
36  
37

### 38 **Sample size**

39 The target number of participants is 66 (ENACT n=33, CAU n=33), which will provide power of 80%  
40 (two-tailed,  $\alpha=0.05$ ) to detect a difference between groups of 0.75 SD on the AOSI. In a previous study  
41 with a similar sample the observed SD=4;<sup>30</sup> consequently we should be able to observe a difference of  
42  $\geq 3$  units in this study.  
43  
44  
45  
46  
47

### 48 **Blinding**

49 Participants and intervention delivery facilitators cannot be blinded to group allocation. Assessors  
50 conducting the AOSI, Gap-Overlap task, MSEL and HINE assessments at 12 months CA will be  
51 blinded to group allocation, as will coders scoring the video/audio-recorded EAS observations, GMA,  
52 and Gap-Overlap task.  
53  
54  
55  
56

### 57 **Care-as-Usual interventions for infants at risk of ASD**

58  
59  
60

1  
2  
3 Participants allocated to CAU will receive usual postnatal care. As developmental and autism-related  
4 concerns generally present after 12 months of age, it is expected that any targeted interventions  
5 provided in the community by usual care providers will fall outside the timeframe of the study.  
6  
7

### 8 9 **The ENACT Intervention**

10 ENACT is a very early intervention targeting infant social reciprocity through supported parent-child  
11 interactions while simultaneously supporting parental mental health and the parent-child relationship  
12 using ACT. Core to ENACT is the social reciprocity intervention which teaches mothers to initiate  
13 and build sensitivity chains with their babies, with the goal that sensitivity chains become longer,  
14 increasingly complex and increasingly symbolic over time, and that the early social development of  
15 the infant is optimally supported. They should be mutually enjoyable, responsive and non-intrusive.  
16  
17

18  
19  
20 The three simple steps to building a sensitivity chain are for the mother to 1) stimulate an initial  
21 enjoyable interaction, 2) *wait* for the infant to signal their intent to continue, and 3) respond to the  
22 infant's signal, hence 'closing the loop' and building a link in the sensitivity chain. This will include  
23 a focus on: initially cultivating sensitivity chains through sensorimotor activities, using positive affect  
24 and predictable surprise to support the infant's involvement, maintaining reciprocal interactions  
25 withinfants with atypical responsiveness, and avoiding parental intrusiveness with atypically  
26 responsive infants. This intervention is specifically targeting the earliest documented abnormalities in  
27 social behaviour in infants at risk of ASD<sup>77</sup>. This aspect of the ENACT intervention was developed  
28 specifically for this trial by Andrea McGlade, with input from Koa Whittingham.  
29  
30  
31

32 ENACT also incorporates parental mental health support grounded in ACT, including values,  
33 mindfulness, experiential acceptance and cognitive defusion (distancing from thoughts). The ACT  
34 component within ENACT draws from a previously trialled intervention<sup>47</sup>. ENACT also contains a  
35 small psychoeducation component on common early parenting challenges of sleep, crying and feeding,  
36 developed by Koa Whittingham<sup>78</sup>. This focusses on understanding the biological regulation of sleep  
37 via the circadian clock and the sleep-wake homeostat, understanding the developmental pattern of  
38 infant crying including the crying peak, and planning ahead on where to seek help for feeding  
39 challenges.  
40  
41

42 ENACT is delivered to mothers (i) via an online course (approximately 8 hours' duration) using the  
43 edX platform ([www.edx.org/](http://www.edx.org/)) and (ii) through telehealth (videoconferencing) consultations with a  
44 trained clinician. The edX course includes: videos and text explaining core concepts, interactive  
45  
46  
47  
48  
49  
50  
51  
52  
53  
54  
55  
56  
57  
58  
59  
60

1  
2  
3 exercises, multiple choice questions, and videos of real parent-and-baby interactions. The social  
4 reciprocity very early intervention is delivered to the infant through the mother and other caregivers.  
5 Intervention delivery to mothers will commence prenatally, and mothers will receive fortnightly  
6 sessions with the clinician to support consolidation of learning. Mothers will be encouraged to work  
7 through the edX course at their own pace, with completion before their babies reach 8 weeks of age.  
8  
9

10  
11  
12  
13 Mothers will be encouraged to engage in regular practice of sensitivity chains, with a goal dose of 30  
14 minutes per day/5 days per week from 2 weeks of age and throughout the first year (total dose  
15 approximately 125 hours). The social reciprocity intervention will be integrated into ordinary everyday  
16 interactions including feeding, nappy changes and playful interactions. Consultation sessions will be  
17 conducted when the infant is 4 weeks, 8 weeks, 12 weeks, 4 months, 6 months, 8 months and 10  
18 months of age, with capacity for additional sessions as needed. Consultations will support mothers in  
19 finding opportunities to practice within everyday life, in tailoring interactions to their babies, and in  
20 adapting to their babies' developmental stage and skills. Mothers will be encouraged to initiate a  
21 sensitivity chain during the consultation, for the clinician's direct observation and feedback. In  
22 addition, clinical consultations will refer to ACT components, supporting maternal mental health  
23 throughout the first year. Clinical consultations will follow a specific protocol, and be recorded for  
24 fidelity.  
25  
26  
27  
28  
29  
30  
31  
32  
33

34  
35 The primary target for the intervention will be the mother, who will be encouraged to share ENACT  
36 with other caregivers (e.g. fathers, grandparents) and teach all other significant caregivers the  
37 sensitivity chain intervention through direct demonstration. The mother will therefore be used as a  
38 conduit to each infant's caregiving system.  
39  
40  
41

#### 42 **Fidelity**

43  
44 The study clinician will receive clinical supervision from Dr Koa Whittingham to support fidelity.  
45 Course completion will be checked by the clinician. Clinical consultations will follow a specific  
46 protocol and will be recorded; 20% will be checked for fidelity against the protocol.  
47  
48  
49

#### 50 **Patient and Public Involvement**

51  
52 Consumer feedback was sought on the protocol, the study forms and the intervention.  
53  
54

#### 55 **Study Procedure**

56  
57 Researchers will contact interested mothers to assess eligibility and provide detailed study information.  
58 Mothers will provide written consent prior to completing baseline assessments, and computer-  
59  
60

generated block randomisation will then be used to randomise families to intervention or CAU. Families allocated to intervention will receive immediate access to ENACT. Families allocated to CAU will receive routine antenatal and postnatal care.

Assessments will be conducted at baseline (prenatal), 3, 6, and 12 months CA. Parents will complete questionnaire measures online; mother-child relationship observations will be conducted via 20-minute video-recorded interactions; and child development assessments will be undertaken at [blinded for review] at 6 and 12 months of age. While completing ENACT, parents will be invited to provide feedback and suggestions for course improvement.

## Measures

### BASELINE ASSESSMENTS

The *Parent Questionnaire* collects (1) general demographic information (parent age, education, income, family composition) and (2) information relevant to the ASD context, such as parent health history, and details of the diagnosis of the first-degree relative (parent or sibling) with ASD. Further information regarding infant delivery, perinatal history, and feeding history will be collected postnatally by brief phone interview

The *Broad Autism Phenotype Questionnaire (BAPQ; 36-items)* assesses ASD-like features in adults through self-report or informant measure<sup>79</sup>. Participants rate how much each item applies to them on a 6-point Likert scale<sup>80</sup>. Internal consistency for the total scale is excellent ( $\alpha=.95$ ) and there is good inter-item reliability<sup>80</sup>.

### CHILD ASSESSMENTS

#### Autism symptomatology

The *Autism Observation Schedule in Infants (AOSI; 12 months)* will be the primary clinical outcome measure assessing intervention effect on infant development and severity of autism symptomatology at 12 months<sup>58</sup>. It is an experimenter-led, semi-structured observational assessment tool, developed for research purposes to study the emergence of ASD-related behavioural markers in infancy (6–18 months)<sup>57 58</sup>. Five standardised activities are delivered between two periods of free play, with a total of 18 items to be scored. Inter-rater reliability of total marker counts (number of items marked as atypical) and total scores, respectively, is good at 6 months (.68 and .74) and excellent at 12 months (.92 and .93)<sup>57</sup>. Test-retest reliability for total marker counts and total scores is fair to good at .68 and .61, respectively<sup>57</sup>. The AOSI differentiates between high-risk and low-risk infants at 12-14 months<sup>81-83</sup>.

1  
2  
3  
4 The *Gap-Overlap task (6 and 12 months)*<sup>59</sup> is used to assess visual attention by measuring differences  
5 in the efficiency of orienting towards peripheral stimuli. Two trial types will be contrasted: Gap and  
6 Overlap. In the Gap condition, an interval of 200-250ms separates the disappearance of the central  
7 stimulus and the appearance of the peripheral one (facilitation). In the Overlap condition, the central  
8 stimulus remains visible and overlaps with the peripheral stimulus. This measures the ability to  
9 disengage from a central stimulus and to orient to a peripheral one. This difference between the Gap  
10 and Overlap times is called the Gap effect. Gap-Overlap time, measured in milliseconds, decreases  
11 from 6 to 12 months for typically developing infants<sup>15 84 85</sup>. Infants who are later diagnosed with ASD  
12 consistently show an *increase* in Gap-Overlap time between 6 and 12 months of age<sup>15 86 87</sup>. This has  
13 been called ‘sticky attention’. Test–retest reliability of the Gap-Overlap gap effect is  $r=.50$  in infants  
14 at age 10 months<sup>59</sup>.  
15  
16  
17  
18  
19  
20  
21  
22  
23  
24

### 25 **Neurodevelopmental and motor assessments**

26 The *Mullen Scales of Early Learning (MSEL; 6 and 12 months)* has been used in the cognitive  
27 assessment of infants and children from birth until 68 months of age<sup>30 32 88-90</sup>. The MSEL has five  
28 scales: Gross Motor [GM], Visual Reception [VR], Fine Motor [FM], Expressive Language [EL], and  
29 Receptive Language [RL], as well as an Early Learning Composite (ELC) score that is composed of  
30 the VR, FM, EL, and RL subscales. The MSEL has demonstrated convergent and divergent construct  
31 validity in infants and children with ASD<sup>91-93</sup>. Interrater reliability has been reported as high ( $r$   
32 = .91-.99)<sup>94</sup>.  
33  
34  
35  
36  
37  
38  
39

40 The *General Movements Assessment (GMA; 3 months)* is a predictive and discriminative tool that  
41 assesses infants’ spontaneous motor activity from pre-term to 20 weeks CA<sup>95</sup>. Scoring is completed  
42 from a videorecording with 2 full movement sequences required for pattern recognition (approximately  
43 5 minutes)<sup>95</sup>. During the fidgety period from 9-20 weeks post-term, fidgety movements can be  
44 abnormal (exaggerated in amplitude and speed), sporadic (confined to a few body parts, never >3  
45 seconds between 9-16 weeks CA), or absent (fidgety movements not present between 9-16 weeks CA)  
46 (optimality scoring)<sup>95</sup>. Abnormal fidgety movements that are absent or abnormal at 12-14 weeks C.A  
47 are highly predictive of cerebral palsy as well as other neurodevelopmental disabilities including  
48 ASD<sup>75 76</sup>. The Baby Moves app will be used to film the videos and transfer the videos for assessment.  
49 GMA will be scored by accredited blinded assessors.  
50  
51  
52  
53  
54  
55  
56  
57  
58  
59  
60

1  
2  
3 The *Hammersmith Infant Neurological Examination (HINE; 6 and 12 months)* is a standardised  
4 clinical neurodevelopmental assessment for infants from 2-24 months of age<sup>96</sup>. The HINE contains  
5 26 items across 5 domains, summed to provide a global optimality score, and can differentiate between  
6 low- and high-risk late preterm and term newborns at 6 and 12 months of age<sup>97-99</sup>.  
7  
8  
9

10  
11 The *Vineland Adaptive Behaviour Scale (3rd ed.; VABS-III; 12 months)* is a standardised measure of  
12 adaptive behaviour, completed by caregivers and scored by a blinded assessor<sup>65</sup>. Standard scores are  
13 generated for the four domains (Communication, Daily Living Skills, Socialization, and Motor Skills)  
14 as well as a global score (Adaptive Behaviour Composite). It has good internal consistency, test-retest  
15 reliability, inter-interviewer reliability, and validity for young children including those with autism<sup>65</sup>.  
16  
17  
18  
19

### 20 21 **Infant regulation**

22  
23 The *Brief Infant Sleep Questionnaire (BISQ; 10-items; 3 and 6 months)* assesses parent-reported infant  
24 sleep patterns (nocturnal sleep duration, night waking and method of falling asleep), parent perception  
25 of infant sleep duration, and sleep-related (parent) behaviours for children from birth-36 months. It is  
26 well validated by comparisons with actigraphy, sleep diaries and caregiver-reported sleep<sup>73 74</sup>.  
27  
28  
29

30  
31 The *Crying Patterns Questionnaire (CPQ; 6-items; 3 and 6 months)* is a parent-report measure  
32 assessing: (1) the amount and time of day when infant crying occurs; (2) situations in which crying  
33 occurs; (3) whether the mother finds the crying distressing and seeks advice and help; and (4) the  
34 mother's responses to crying. In comparison to 24 hour cry-fuss diaries kept by mothers, the CPQ  
35 showed moderate-to-good validity (.51-.68) for total duration of crying scores<sup>74</sup>.  
36  
37  
38  
39

40  
41 The *Infant Toddler Social & Emotional Assessment (ITSEA; 165-items; 12 months)* is a parent-report  
42 questionnaire used to assess social-emotional problems/competencies in the domains of behavioural  
43 dysregulation and competence. The ITSEA has established concurrent validity, strong test-retest  
44 reliability ( $\alpha=.75-.91$ ) and good internal reliability for each subscale ( $\alpha=.86$  for dysregulation,  $\alpha=.87$   
45 for externalising,  $\alpha=.85$  for internalising, and  $\alpha=.89$  for competence)<sup>100 101</sup>. The ITSEA has been  
46 validated for 12 months CA and discriminates between low- and high-risk infants, particularly within  
47 the domain of dysregulation<sup>72</sup>.  
48  
49  
50  
51  
52

53  
54 The *Communication and Symbolic Behaviour Scales Developmental Profile (CSBS DP; 6 and 12*  
55 *months)* evaluates the symbolic abilities and communication skills of children aged 6-24 months<sup>69</sup>. It  
56 includes a 24-item Infant Toddler Checklist which is used as a developmental screening tool to detect  
57  
58  
59  
60

1  
2  
3 autism<sup>102</sup>. The CSBS DP has excellent internal consistency ( $\alpha=.86-.92$ ), good test-retest reliability and  
4 good construct and concurrent validity<sup>69 103</sup>.  
5  
6  
7

### 8 **Mother-infant relationship**

9  
10 *Emotional Availability Scales (EAS; 6 months)*. Coders blind to intervention condition will use the  
11 EAS to score 20-minute naturalistic observations of parent-child interactions<sup>63</sup>. The EAS is used to  
12 measure quality of parent-child relationships across six scales: parental sensitivity, parental structuring,  
13 parental non-intrusiveness, parental non-hostility, child responsiveness and child involvement<sup>63</sup>. The  
14 scales have high inter-rater reliability for the parent scales of sensitivity (.95), structuring (.87), non-  
15 intrusiveness (.81), non-hostility (.72) and the child scales of responsiveness (.87) and involvement  
16 (.87)<sup>104</sup>.  
17  
18  
19  
20  
21  
22  
23

24 The *Emotional Availability - Self Report (EA-SR; 36-items; 3, 6 and 12 months)* is a parent-report  
25 questionnaire used to measure emotional availability in a dyadic relationship across 5 subscales:  
26 Intrusiveness, Hostility, Mutual Attunement, Affect Quality and Capacity to Involve the Parent.  
27 Reliability ranges from .71-.84 for all subscales except affect quality ( $\alpha=.49$ )<sup>104</sup>. All subscales (except  
28 for Intrusiveness) have moderate correlations with the corresponding EAS observed subscales, thus  
29 supporting the validity of the self-report measure<sup>104 105</sup>.  
30  
31  
32  
33  
34  
35

### 36 **Maternal mental health**

37 The *Acceptance and Action Questionnaire (AAQ-II; 7-items; 3, 6 and 12 months)* is a self-report  
38 questionnaire measuring psychological flexibility, the key target of ACT<sup>62</sup>. The AAQ-II has good test-  
39 retest reliability and convergent validity and excellent internal consistency ( $\alpha=.94$ )<sup>62</sup>.  
40  
41  
42  
43

44 The *Depression Anxiety Stress Scales (DASS-21; 21-items; 3, 6 and 12 months)* assess symptoms of  
45 depression, anxiety, and stress in adults. The DASS-21 produces three subscales, each with good  
46 internal consistency: the Depression ( $\alpha=.91-.97$ ), Anxiety ( $\alpha=.81-.92$ ), and Stress ( $\alpha=.88-.95$ ) scales<sup>106</sup>,  
47 and a Total score. The DASS-21 has good convergent validity and acceptable discriminative validity<sup>106</sup>.  
48  
49  
50

### 51 **Comparison group**

52  
53 A comparison group of 30 healthy low risk infants will be recruited and assessed on the Gap-Overlap  
54 task and the HINE at 6 and 12 months, and the AOSI at 12 months. This comparison data will support  
55 the interpretation of results, particularly for the novel Gap-Overlap task.  
56  
57  
58  
59

### 60 **Data Collection and Management**

1  
2  
3 Data will be entered onto the REDCap database in a potentially individually identifiable format. Once  
4 de-identified, data will be stored in a re-identifiable format on a secure electronic database protected  
5 by the [blinded for review] secure server, and only accessible to members of the research team.  
6  
7  
8  
9

### 10 **Statistical Analysis**

11 Analysis (using STATA or SPSS) will follow standard methods for RCTs using comparisons between  
12 the two groups (e.g. general linear models, ANCOVA) and intention-to-treat analyses.  
13  
14  
15

### 16 **Monitoring**

#### 17 *Data monitoring*

18 As this is a trial of a very early intervention with low risk, a data monitoring committee is not required.  
19 Any adverse events will be recorded and reported in the published results.  
20  
21  
22  
23  
24

#### 25 *Harms*

26 This study should not pose risks beyond those of everyday living. Any participants experiencing undue  
27 psychological distress will be referred to their general practitioner. For infants scoring at high  
28 developmental risk on the GMA, HINE, MSEL or AOSI, infants' general practitioners/paediatricians  
29 and parents will be notified. All families will be sent a paediatrician's report detailing 12-month  
30 developmental assessment results.  
31  
32  
33  
34  
35  
36

### 37 **ETHICS AND DISSEMINATION**

38 ENACT should support mothers' mental health and may also support infant development. Ethical  
39 approval has been obtained ([blinded for review]) and the trial registered (Australian New Zealand  
40 Clinical Trials Registry, ACTRN12618002046280p). Study results will be disseminated through  
41 scientific journal publications and conference presentations. If shown to be effective, edX facilitates  
42 easy dissemination at minimal cost.  
43  
44  
45  
46  
47  
48

49 This study will test the efficacy of an innovative, very early intervention for infants at risk of ASD,  
50 integrating early social reciprocity intervention with parental mental health and parent-child  
51 relationship support.  
52  
53  
54

55 **Funding Statement** This work is supported by two University of Queensland Graduate School  
56 Scholarships (UQGSS) (AG and KK), a Children's Hospital Foundation Early Career Fellowship  
57  
58  
59  
60



(AEM; award ref. no. 50223), an NHMRC Research Fellowship (RNB; 1105038) and a private philanthropic donation.

**Competing Interests Statement:** ENACT was developed from PACT, an intervention developed by researchers at The University of Queensland including Koa Whittingham and Roslyn Boyd. Andrea McGlade and Koa Whittingham developed the of the very early intervention component of edX. ENACT has been developed using the online platform edX.

**Abbreviations:**

|          |                                                                                        |
|----------|----------------------------------------------------------------------------------------|
| AAQ-II   | Acceptance and Action Questionnaire                                                    |
| ACT      | Acceptance and Commitment Therapy                                                      |
| ADOS     | Autism Diagnostic Observation Schedule                                                 |
| ASD      | Autism Spectrum Disorder                                                               |
| BAP      | Broad Autism Phenotype                                                                 |
| BISQ     | Brief Infant Sleep Questionnaire                                                       |
| CA       | Corrected age                                                                          |
| CAU      | Care as Usual                                                                          |
| CSBS-DP  | Communication and Symbolic Behaviour Scales – Developmental Profile                    |
| CPQ      | Crying Pattern Questionnaire                                                           |
| DASS-21  | Depression Anxiety Stress Scale                                                        |
| EAS      | Emotional Availability Scales                                                          |
| EA-SR    | Emotional Availability Scales – Self Report                                            |
| EL       | Expressive Language                                                                    |
| ELC      | Early Learning Composite                                                               |
| ENACT    | ENvironmental enrichment for infants; parenting with Acceptance and Commitment Therapy |
| FM       | Fine Motor                                                                             |
| GMA      | General Movement Assessment                                                            |
| HINE     | Hammersmith Infant Neurological Examination                                            |
| ITSEA    | Infant-Toddler Social and Emotional Assessment                                         |
| MSEL     | Mullen Scales of Early Learning                                                        |
| RCT      | Randomised Controlled Trial                                                            |
| RL       | Receptive Language                                                                     |
| VABS-III | Vineland Adaptive Behaviour Scales Third Edition                                       |

VR Visual Reception

FIGURE 1: CONSORT flow chart of the ENACT study

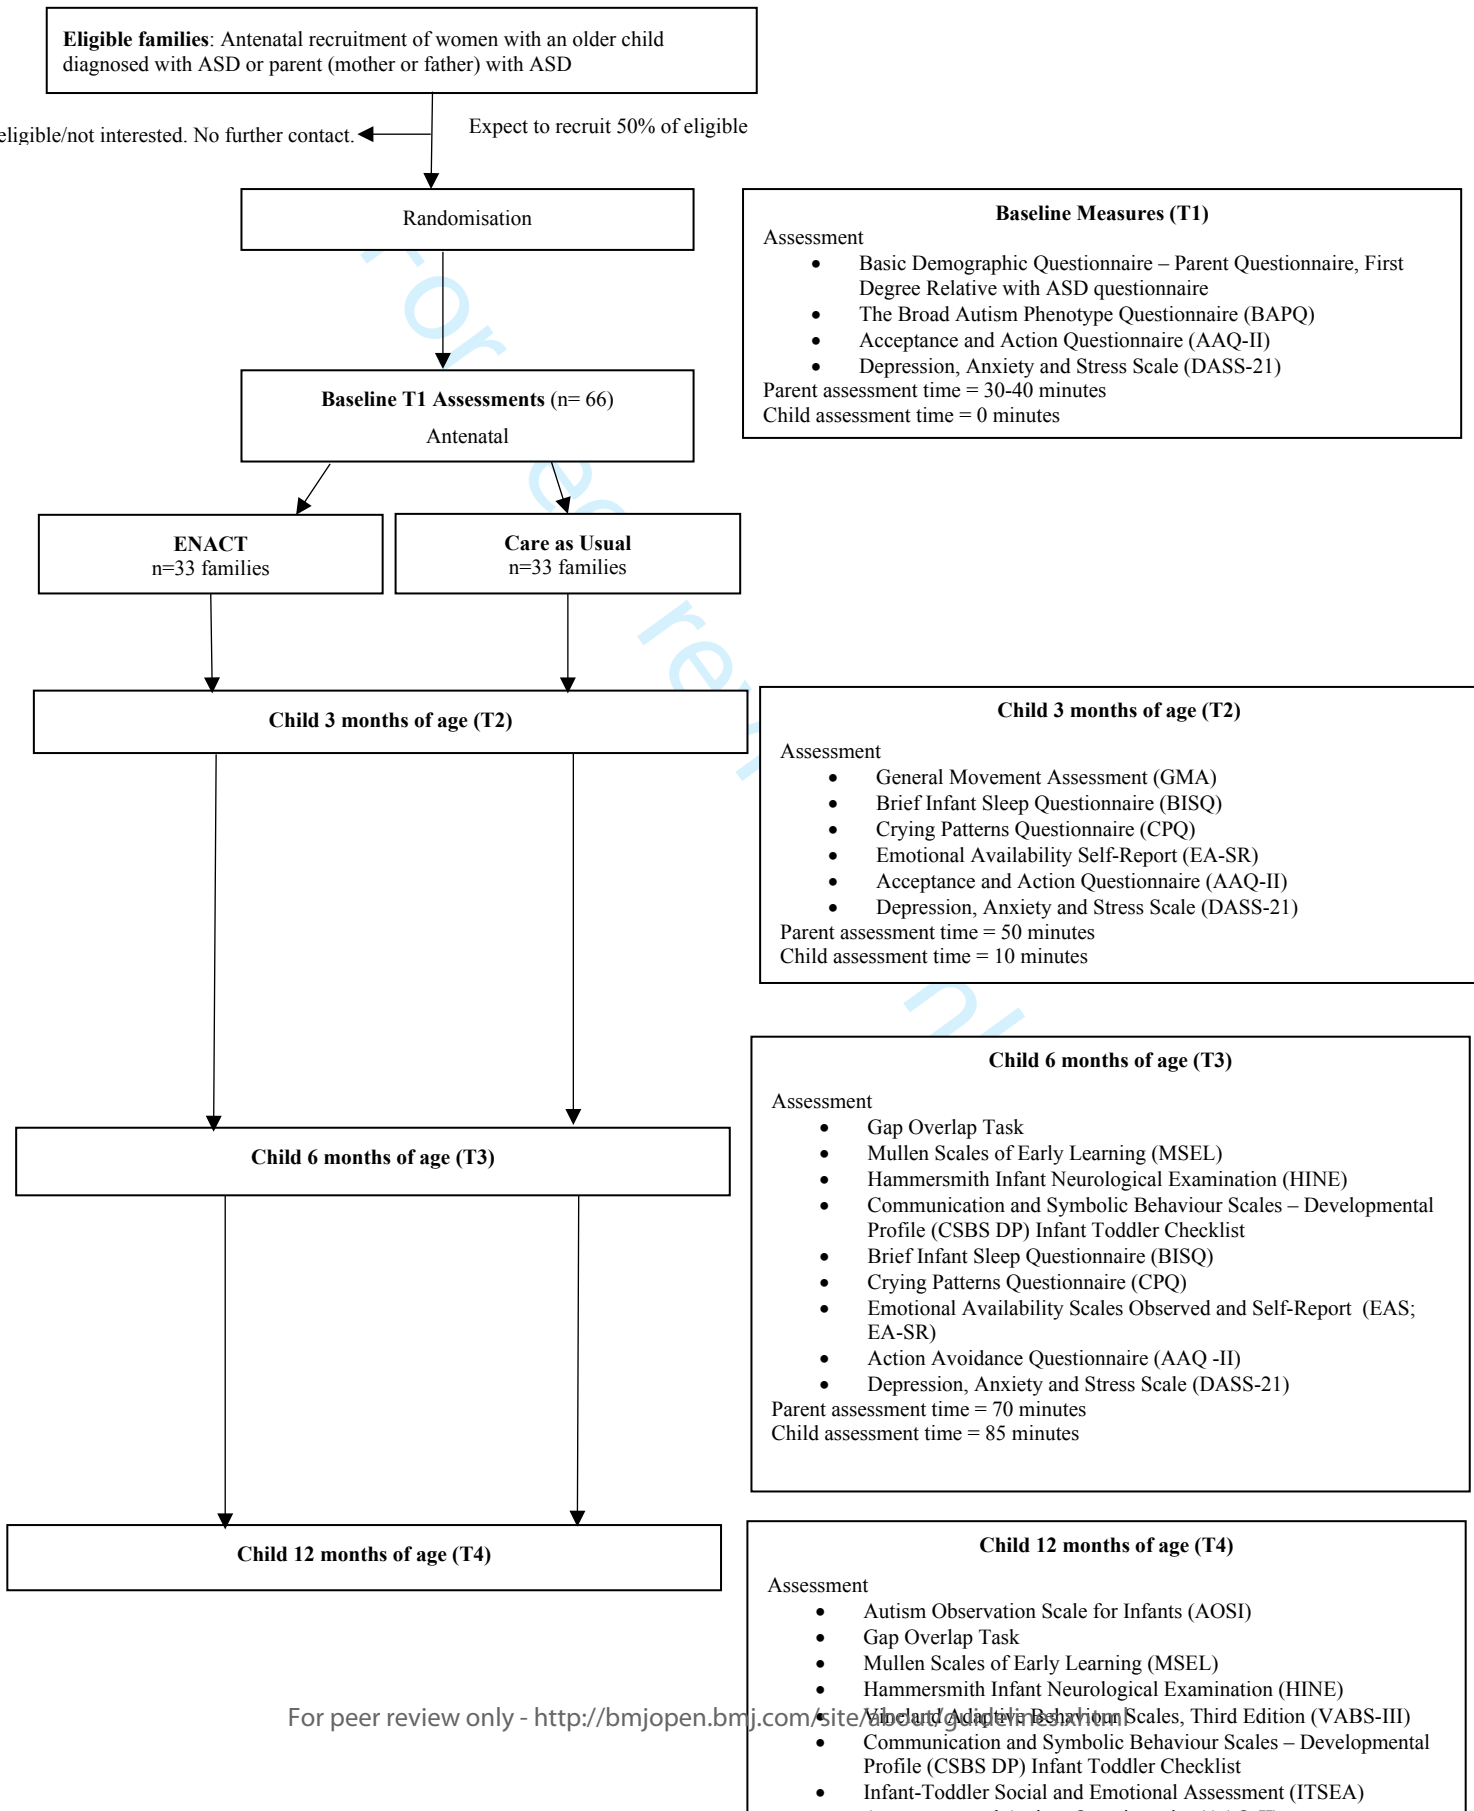

## References

1. American Psychiatric A. Diagnostic and statistical manual of mental disorders : DSM-5. Fifth edition.. ed: Arlington, VA : American Psychiatric Publishing 2013.
2. Mandy WP, Charman T, Skuse DH. Testing the construct validity of proposed criteria for DSM-5 autism spectrum disorder. *Journal of the American Academy of Child and Adolescent Psychiatry* 2012;51(1):41-50. doi: 10.1016/j.jaac.2011.10.013 [published Online First: 2011/12/20]
3. Chaste P, Leboyer M. Autism risk factors: genes, environment, and gene-environment interactions. *Dialogues in clinical neuroscience* 2012;14(3):281-92.
4. Wender C.L.A. V-VJ. Challenge and Potential for Research on Gene-Environment Interactions in Autism Spectrum Disorder. In: P. T, B L, eds. Gene-Environment Transactions in Developmental Psychopathology: Springer, Cham 2017.
5. AIHW. Autism in Australia, 2017.
6. Kogan MD, Vladutiu CJ, Schieve LA, et al. The Prevalence of Parent-Reported Autism Spectrum Disorder Among US Children. *Pediatrics* 2018;142(6) doi: 10.1542/peds.2017-4161
7. Baio J, Wiggins L, Christensen DL, et al. Prevalence of Autism Spectrum Disorder Among Children Aged 8 Years — Autism and Developmental Disabilities Monitoring Network, 11 Sites, United States, 2014. *MMWR Surveillance Summaries* 2018;67(6):1-23. doi: 10.15585/mmwr.ss6706a1
8. Bent CA, Dissanayake C, Barbaro J. Mapping the diagnosis of autism spectrum disorders in children aged under 7 years in Australia, 2010–2012. *Medical Journal of Australia* 2015;202(6):317-20. doi: 10.5694/mja14.00328
9. Ozonoff S, Young GS, Carter A, et al. Recurrence risk for autism spectrum disorders: a Baby Siblings Research Consortium study. *Pediatrics* 2011;128(3):e488-95. doi: 10.1542/peds.2010-2825 [published Online First: 2011/08/17]
10. Messinger DS, Young GS, Webb SJ, et al. Early sex differences are not autism-specific: A Baby Siblings Research Consortium (BSRC) study. *Molecular autism* 2015;6:32. doi: 10.1186/s13229-015-0027-y [published Online First: 2015/06/06]
11. Charman T, Young GS, Brian J, et al. Non-ASD outcomes at 36 months in siblings at familial risk for autism spectrum disorder (ASD): A baby siblings research consortium (BSRC) study. *Autism research : official journal of the International Society for Autism Research* 2017;10(1):169-78. doi: 10.1002/aur.1669 [published Online First: 2016/07/16]
12. Shephard E, Milosavljevic B, Pasco G, et al. Mid-childhood outcomes of infant siblings at familial high-risk of autism spectrum disorder. *Autism research : official journal of the International Society for Autism Research* 2017;10(3):546-57. doi: 10.1002/aur.1733 [published Online First: 2016/11/30]
13. Miller M, Iosif AM, Young GS, et al. School-age outcomes of infants at risk for autism spectrum disorder. *Autism research : official journal of the International Society for Autism Research* 2016;9(6):632-42. doi: 10.1002/aur.1572 [published Online First: 2015/10/10]
14. Bedford R, Gliga T, Shephard E, et al. Neurocognitive and observational markers: prediction of autism spectrum disorder from infancy to mid-childhood. *Molecular autism* 2017;8:49. doi: 10.1186/s13229-017-0167-3 [published Online First: 2017/10/12]
15. Clifford SM, Hudry K, Elsabbagh M, et al. Temperament in the first 2 years of life in infants at high-risk for autism spectrum disorders. *Journal of autism and developmental disorders* 2013;43(3):673-86. doi: 10.1007/s10803-012-1612-y [published Online First: 2012/08/25]
16. Leonard HC, Bedford R, Charman T, et al. Motor development in children at risk of autism: a follow-up study of infant siblings. *Autism : the international journal of research and practice* 2014;18(3):281-91. doi: 10.1177/1362361312470037 [published Online First: 2013/10/09]

17. Sacrey LA, Armstrong VL, Bryson SE, et al. Impairments to visual disengagement in autism spectrum disorder: a review of experimental studies from infancy to adulthood. *Neuroscience and biobehavioral reviews* 2014;47:559-77. doi: 10.1016/j.neubiorev.2014.10.011 [published Online First: 2014/12/03]
18. Franchini M, Duku E, Armstrong V, et al. Variability in Verbal and Nonverbal Communication in Infants at Risk for Autism Spectrum Disorder: Predictors and Outcomes. *Journal of autism and developmental disorders* 2018;48(10):3417-31. doi: 10.1007/s10803-018-3607-9
19. Jones EJH, Gliga T, Bedford R, et al. Developmental pathways to autism: A review of prospective studies of infants at risk. *Neuroscience and biobehavioral reviews* 2014;39(100):1-33. doi: 10.1016/j.neubiorev.2013.12.001
20. Johnson MH, Gliga T, Jones E, et al. Annual research review: Infant development, autism, and ADHD--early pathways to emerging disorders. *Journal of child psychology and psychiatry, and allied disciplines* 2015;56(3):228-47. doi: 10.1111/jcpp.12328
21. Charman T. Mapping Early Symptom Trajectories in Autism Spectrum Disorder: Lessons and Challenges for Clinical Practice and Science. *Journal of the American Academy of Child and Adolescent Psychiatry* 2018;57(11):820-21. doi: 10.1016/j.jaac.2018.06.021 [published Online First: 2018/11/06]
22. Elsabbagh M, Johnson MH. Autism and the Social Brain: The First-Year Puzzle. *Biological psychiatry* 2016;80(2):94-99. doi: 10.1016/j.biopsych.2016.02.019 [published Online First: 2016/04/27]
23. Holmboe K, Elsabbagh M, Volein A, et al. Frontal cortex functioning in the infant broader autism phenotype. *Infant behavior & development* 2010;33(4):482-91. doi: 10.1016/j.infbeh.2010.05.004 [published Online First: 2010/07/09]
24. Estes A, Zwaigenbaum L, Gu H, et al. Behavioral, cognitive, and adaptive development in infants with autism spectrum disorder in the first 2 years of life. *Journal of neurodevelopmental disorders* 2015;7(1):24. doi: 10.1186/s11689-015-9117-6 [published Online First: 2015/07/24]
25. Trevarthen C, Delafield-Butt JT. Autism as a developmental disorder in intentional movement and affective engagement. *Frontiers in integrative neuroscience* 2013;7:49-49. doi: 10.3389/fnint.2013.00049
26. Tsang T. Mechanisms Conferring Risk versus Resilience for Autism Spectrum Disorder in Early Infancy. In: Dapretto M, Johnson SP, Bookheimer S, et al., eds.: ProQuest Dissertations Publishing, 2018.
27. Conti E, Sara E, Viviana E, et al. The first thousand days of the autistic brain: a systematic review of diffusion imaging studies. *Frontiers in Human Neuroscience* 2015;9 doi: 10.3389/fnhum.2015.00159
28. Wolff JJ, Jacob S, Elison JT. The journey to autism: Insights from neuroimaging studies of infants and toddlers. 2018;30(2):479-95. doi: 10.1017/S0954579417000980
29. Emerson RW, Adams C, Nishino T, et al. Functional neuroimaging of high-risk 6-month-old infants predicts a diagnosis of autism at 24 months of age. *Science translational medicine* 2017;9(393) doi: 10.1126/scitranslmed.aag2882 [published Online First: 2017/06/09]
30. Green J, Charman T, Pickles A, et al. Parent-mediated intervention versus no intervention for infants at high risk of autism: a parallel, single-blind, randomised trial. *The Lancet Psychiatry* 2015;2(2):133-40. doi: 10.1016/S2215-0366(14)00091-1
31. Baranek GT, Watson LR, Turner-Brown L, et al. Preliminary efficacy of adapted responsive teaching for infants at risk of autism spectrum disorder in a community sample. *Autism research and treatment* 2015;2015:386951. doi: 10.1155/2015/386951 [published Online First: 2015/02/05]
32. Watson LR, Crais ER, Baranek GT, et al. Parent-Mediated Intervention for One-Year-Olds Screened as At-Risk for Autism Spectrum Disorder: A Randomized Controlled Trial. *Journal*

- 1  
2  
3 *of autism and developmental disorders* 2017;47(11):3520-40. doi: 10.1007/s10803-017-3268-  
4 0 [published Online First: 2017/09/02]
- 5  
6 33. Whitehouse AJO, Varcin JK, Alvares GA, et al. Pre-emptive intervention versus treatment as usual  
7 for infant showing early behavioural risk signs of autism spectrum disorder: a single-blind,  
8 randomised controlled trial. *Lancet Child and Adolescent Health* 2019:30184-1.
- 9  
10 34. Green J, Pickles A, Pasco G, et al. Randomised trial of a parent-mediated intervention for infants  
11 at high risk for autism: longitudinal outcomes to age 3 years. *Journal of Child Psychology and*  
12 *Psychiatry* 2017;58(12):1330-40. doi: 10.1111/jcpp.12728
- 13  
14 35. Kasari C, Siller M, Huynh LN, et al. Randomized controlled trial of parental responsiveness  
15 intervention for toddlers at high risk for autism. *Infant Behavior and Development*  
16 2014;37(4):711-21. doi: 10.1016/j.infbeh.2014.08.007
- 17  
18 36. Jones EJH, Dawson G, Kelly J, et al. Parent-delivered early intervention in infants at risk for ASD:  
19 Effects on electrophysiological and habituation measures of social attention. *Autism research :  
20 official journal of the International Society for Autism Research* 2017;10(5):961-72. doi:  
21 10.1002/aur.1754 [published Online First: 2017/03/01]
- 22  
23 37. Zaidman-Zait A, Mirenda P, Duku E, et al. Examination of bidirectional relationships between  
24 parent stress and two types of problem behavior in children with autism spectrum disorder.  
25 *Journal of autism and developmental disorders* 2014;44(8):1908-17. doi: 10.1007/s10803-  
26 014-2064-3 [published Online First: 2014/02/20]
- 27  
28 38. Yorke I, White P, Weston A, et al. The Association Between Emotional and Behavioral Problems  
29 in Children with Autism Spectrum Disorder and Psychological Distress in Their Parents: A  
30 Systematic Review and Meta-analysis. *Journal of autism and developmental disorders*  
31 2018;48(10):3393-415. doi: 10.1007/s10803-018-3605-y [published Online First: 2018/05/20]
- 32  
33 39. Nicholas DB, Zwaigenbaum L, Ing S, et al. "Live It to Understand It": The Experiences of Mothers  
34 of Children With Autism Spectrum Disorder. *Qualitative health research* 2016;26(7):921-34.  
35 doi: 10.1177/1049732315616622 [published Online First: 2015/11/28]
- 36  
37 40. Wiggins LD, Rubenstein E, Daniels J, et al. A Phenotype of Childhood Autism Is Associated with  
38 Preexisting Maternal Anxiety and Depression. *Journal of abnormal child psychology* 2018 doi:  
39 10.1007/s10802-018-0469-8 [published Online First: 2018/08/22]
- 40  
41 41. Yirmiya N, Shaked M. Psychiatric Disorders in Parents of Children with Autism: A Meta-Analysis.  
42 *Journal of Child Psychology and Psychiatry* 2005;46(1):69-83. doi: 10.1111/j.1469-  
43 7610.2004.00334.x
- 44  
45 42. Goodman SH, Rouse MH, Connell AM, et al. Maternal Depression and Child Psychopathology:  
46 A Meta-Analytic Review. *Clinical Child and Family Psychology Review* 2011;14(1):1-27. doi:  
47 10.1007/s10567-010-0080-1
- 48  
49 43. Seidman I, Yirmiya N, Milshtein S, et al. The Broad Autism Phenotype Questionnaire: mothers  
50 versus fathers of children with an autism spectrum disorder. *Journal of autism and  
51 developmental disorders* 2012;42(5):837-46. doi: 10.1007/s10803-011-1315-9 [published  
52 Online First: 2011/06/28]
- 53  
54 44. Rubenstein E, Chawla D. Broader autism phenotype in parents of children with autism: a  
55 systematic review of percentage estimates. *Journal of child and family studies*  
56 2018;27(6):1705-20. doi: 10.1007/s10826-018-1026-3 [published Online First: 2018/05/08]
- 57  
58 45. Rubenstein E, Wiggins LD, Schieve LA, et al. Associations between parental broader autism  
59 phenotype and child autism spectrum disorder phenotype in the Study to Explore Early  
60 Development. *Autism : the international journal of research and practice*  
2018:1362361317753563. doi: 10.1177/1362361317753563 [published Online First:  
2018/01/30]
46. Ingersoll B, Hambrick DZ. The relationship between the broader autism phenotype, child severity,  
and stress and depression in parents of children with autism spectrum disorders. *Research in  
autism spectrum disorders* 2011;5(1):337-44. doi: <https://doi.org/10.1016/j.rasd.2010.04.017>

- 1
- 2
- 3
- 4 47. Whittingham K, Sheffield J, Boyd RN. Parenting acceptance and commitment therapy: a
- 5 randomised controlled trial of an innovative online course for families of children with cerebral
- 6 palsy. *BMJ Open* 2016;6(10):e012807. doi: 10.1136/bmjopen-2016-012807
- 7 48. Lowe JR, MacLean PC, Duncan AF, et al. Association of maternal interaction with emotional
- 8 regulation in 4- and 9-month infants during the Still Face Paradigm. *Infant behavior &*
- 9 *development* 2012;35(2):295-302. doi: 10.1016/j.infbeh.2011.12.002 [published Online First:
- 10 2012/01/06]
- 11 49. Harker CM, Ibanez LV, Nguyen TP, et al. The Effect of Parenting Style on Social Smiling in
- 12 Infants at High and Low Risk for ASD. *Journal of autism and developmental disorders*
- 13 2016;46(7):2399-407. doi: 10.1007/s10803-016-2772-y [published Online First: 2016/03/24]
- 14 50. Sullivan K, Stone WL, Dawson G. Potential neural mechanisms underlying the effectiveness of
- 15 early intervention for children with autism spectrum disorder. *Research in developmental*
- 16 *disabilities* 2014;35(11):2921-32. doi: 10.1016/j.ridd.2014.07.027
- 17 51. LeBlanc JJ, Fagiolini M. Autism: A “Critical Period” Disorder? *Neural Plasticity* 2011;2011(2011)
- 18 doi: 10.1155/2011/921680
- 19 52. Killmeyer S, Kaczmarek L. Parent training and joint engagement in young children with autism
- 20 spectrum disorder. *Autism & Developmental Language Impairments* 2017;2 doi:
- 21 10.1177/2396941517699214
- 22 53. Elsabbagh M, Gliga T, Pickles A, et al. The development of face orienting mechanisms in infants
- 23 at-risk for autism. *Behavioural brain research* 2013;251:147-54. doi:
- 24 10.1016/j.bbr.2012.07.030 [published Online First: 2012/08/01]
- 25 54. Elsabbagh M, Holmboe K, Gliga T, et al. Social and attention factors during infancy and the later
- 26 emergence of autism characteristics. *Progress in brain research* 2011;189:195-207. doi:
- 27 10.1016/b978-0-444-53884-0.00025-7 [published Online First: 2011/04/15]
- 28 55. Wan MW, Green J, Elsabbagh M, et al. Parent-infant interaction in infant siblings at risk of autism.
- 29 *Research in developmental disabilities* 2012;33(3):924-32. doi: 10.1016/j.ridd.2011.12.011
- 30 [published Online First: 2012/01/20]
- 31 56. Wan MW, Green J, Elsabbagh M, et al. Quality of interaction between at-risk infants and caregiver
- 32 at 12-15 months is associated with 3-year autism outcome. *Journal of child psychology and*
- 33 *psychiatry, and allied disciplines* 2013;54(7):763-71. doi: 10.1111/jcpp.12032 [published
- 34 Online First: 2012/12/12]
- 35 57. Bryson SE, Zwaigenbaum L, McDermott C, et al. The Autism Observation Scale for Infants: scale
- 36 development and reliability data. *Journal of autism and developmental disorders*
- 37 2008;38(4):731-8. doi: 10.1007/s10803-007-0440-y [published Online First: 2007/09/18]
- 38 58. Bryson S, Zwaigenbaum L. Autism Observation Scale for Infants 2014.
- 39 59. Cousijn J, Hessels RS, Van Der Stigchel S, et al. Evaluation of the Psychometric Properties of the
- 40 Gap-Overlap Task in 10-Month-Old Infants. *Infancy : the official journal of the*
- 41 *International Society on Infant Studies* 2017;22(4):571-79. doi: 10.1111/infa.12185
- 42 60. Elsabbagh M, Volein A, Holmboe K, et al. Visual orienting in the early broader autism phenotype:
- 43 disengagement and facilitation. *Journal of child psychology and psychiatry, and allied*
- 44 *disciplines* 2009;50(5):637-42. doi: 10.1111/j.1469-7610.2008.02051.x [published Online
- 45 First: 2009/03/21]
- 46 61. Brown TA, Chorpita BF, Korotitsch W, et al. Psychometric properties of the Depression Anxiety
- 47 Stress Scales (DASS) in clinical samples. *Behaviour Research and Therapy* 1997;35(1):79-89.
- 48 doi: [https://doi.org/10.1016/S0005-7967\(96\)00068-X](https://doi.org/10.1016/S0005-7967(96)00068-X)
- 49 62. Mitchell AE, Whittingham K, Steindl S, et al. Feasibility and acceptability of a brief online self-
- 50 compassion intervention for mothers of infants. *Archives of Women's Mental Health*
- 51 2018;21(5):553-61. doi: 10.1007/s00737-018-0829-y
- 52
- 53
- 54
- 55
- 56
- 57
- 58
- 59
- 60

- 1
- 2
- 3
- 4 63. Biringen Z, Derscheid D, Vliegen N, et al. Emotional availability (EA): Theoretical background,
- 5 empirical research using the EA Scales, and clinical applications. *Developmental Review*
- 6 2014;34(2):114-67. doi: <https://doi.org/10.1016/j.dr.2014.01.002>
- 7 64. Burns TG, King TZ, Spencer KS. Mullen Scales of Early Learning: The Utility in Assessing
- 8 Children Diagnosed with Autism Spectrum Disorders, Cerebral Palsy, and Epilepsy. *Applied*
- 9 *Neuropsychology: Child* 2012;2(1):1-10. doi: 10.1080/21622965.2012.682852
- 10 65. Sparrow SS, Cicchetti DV, Saulnier C. Vineland Adaptive Behavior Scales, third edition
- 11 (Vineland—3). Bloomington, MN: Pearson 2016.
- 12 66. Haataja L, Cowan F, Mercuri E, et al. Application of a scorable neurologic examination in healthy
- 13 term infants aged 3 to 8 months. *The Journal of pediatrics* 2003;143(4):546-46. doi:
- 14 10.1067/S0022-3476(03)00393-7
- 15 67. Haataja L, Mercuri E, Regev R, et al. Optimality score for the neurologic examination of the infant
- 16 at 12 and 18 months of age. *The Journal of pediatrics* 1999;135(2):153-61. doi:
- 17 10.1016/S0022-3476(99)70016-8
- 18 68. Morgan C, Honan I, Allsop A, et al. Psychometric Properties of Assessments of Cognition in
- 19 Infants With Cerebral Palsy or Motor Impairment: A Systematic Review. *Journal of pediatric*
- 20 *psychology* 2018 doi: 10.1093/jpepsy/jsy068
- 21 69. Wetherby A, Allen L, Cleary J, et al. Validity and reliability of the communication and symbolic
- 22 behavior scales developmental profile with very young children. *Journal of Speech, Language,*
- 23 *and Hearing Research* 2002;45(6):1202-18. doi: 10.1044/1092-4388(2002/097)
- 24 70. Luyster RJ, Kadlec MB, Carter A, et al. Language Assessment and Development in Toddlers with
- 25 Autism Spectrum Disorders. *Journal of autism and developmental disorders* 2008;38(8):1426-
- 26 38. doi: 10.1007/s10803-007-0510-1
- 27 71. Watt N, Wetherby A, Shumway S. Prelinguistic Predictors of Language Outcome at 3 Years of
- 28 Age. *Journal of Speech, Language, and Hearing Research* 2006;49(6):1224-37. doi:
- 29 10.1044/1092-4388(2006/088)
- 30 72. Sanner N, Smith L, Wentzel-Larsen T, et al. Early identification of social-emotional problems:
- 31 Applicability of the Infant-Toddler Social Emotional Assessment (ITSEA) at its lower age limit.
- 32 *Infant Behavior and Development* 2016;42:69-85. doi: 10.1016/j.infbeh.2015.11.001
- 33 73. Teng A, Bartle A, Sadeh A, et al. Infant and toddler sleep in Australia and New Zealand. *Journal*
- 34 *of paediatrics and child health* 2012;48(3):268-73. doi: 10.1111/j.1440-1754.2011.02251.x
- 35 [published Online First: 2011/11/24]
- 36 74. Wolke D, Meyer R, Gray P. Validity of the crying pattern questionnaire in a sample of excessively
- 37 crying babies. *Journal of Reproductive and Infant Psychology*, 1994;12(2):105-14.
- 38 75. Einspieler C, Sigafos J, Bolte S, et al. Highlighting the first 5 months of life: General movements
- 39 in infants later diagnosed with autism spectrum disorder or Rett Syndrome. *Research in autism*
- 40 *spectrum disorders* 2014;8(3):286-91. doi: 10.1016/j.rasd.2013.12.013 [published Online First:
- 41 2014/03/01]
- 42 76. Zappella M, Einspieler C, Bartl-Pokorny KD, et al. What do home videos tell us about early motor
- 43 and socio-communicative behaviours in children with autistic features during the second year
- 44 of life--An exploratory study. *Early human development* 2015;91(10):569-75. doi:
- 45 10.1016/j.earlhumdev.2015.07.006 [published Online First: 2015/08/08]
- 46 77. Jones EJ, Venema K, Earl R, et al. Reduced engagement with social stimuli in 6-month-old infants
- 47 with later autism spectrum disorder: a longitudinal prospective study of infants at high familial
- 48 risk. *Journal of neurodevelopmental disorders* 2016;8:7. doi: 10.1186/s11689-016-9139-8
- 49 [published Online First: 2016/03/17]
- 50 78. Whittingham K, Coyne LW. Acceptance and commitment therapy : the clinician's guide for
- 51 supporting parents. London: Academic Press 2019.
- 52
- 53
- 54
- 55
- 56
- 57
- 58
- 59
- 60

- 1  
2  
3  
4 79. Hurley RS, Losh M, Parlier M, et al. The broad autism phenotype questionnaire. *J Autism Dev*  
5 *Disord* 2007;37(9):1679-90. doi: 10.1007/s10803-006-0299-3 [published Online First:  
6 2006/12/06]
- 7 80. Sasson NJ, Lam KS, Childress D, et al. The broad autism phenotype questionnaire: prevalence and  
8 diagnostic classification. *Autism research : official journal of the International Society for*  
9 *Autism Research* 2013;6(2):134-43. doi: 10.1002/aur.1272 [published Online First: 2013/02/22]
- 10 81. Brian J, Bryson SE, Garon N, et al. Clinical assessment of autism in high-risk 18-month-olds.  
11 *Autism : the international journal of research and practice* 2008;12(5):433-56. doi:  
12 10.1177/1362361308094500 [published Online First: 2008/09/23]
- 13 82. Gammer I, Bedford R, Elsabbagh M, et al. Behavioural markers for autism in infancy: scores on  
14 the Autism Observational Scale for Infants in a prospective study of at-risk siblings. *Infant*  
15 *behavior & development* 2015;38:107-15. doi: 10.1016/j.infbeh.2014.12.017 [published  
16 Online First: 2015/02/07]
- 17 83. Georgiades S, Szatmari P, Zwaigenbaum L, et al. A prospective study of autistic-like traits in  
18 unaffected siblings of probands with autism spectrum disorder. *JAMA psychiatry*  
19 2013;70(1):42-8. doi: 10.1001/2013.jamapsychiatry.1 [published Online First: 2012/09/05]
- 20 84. Matsuzawa M, Shimojo S. Infants' fast saccades in the gap paradigm and development of visual  
21 attention. *Infant Behavior and Development* 1997;20(4):449-55.
- 22 85. McConnell BA, Bryson S. Visual attention and temperament: Developmental data from the first 6  
23 months of life. *Infant Behavior and Development* 2005;28(4):537-44.
- 24 86. Zwaigenbaum L, Bryson S, Rogers T, et al. Behavioral manifestations of autism in the first year  
25 of life. *International journal of developmental neuroscience : the official journal of the*  
26 *International Society for Developmental Neuroscience* 2005;23(2-3):143-52. doi:  
27 10.1016/j.ijdevneu.2004.05.001 [published Online First: 2005/03/08]
- 28 87. Bryson S, Garon N, McMullen T, et al. Impaired disengagement of attention and its relationship  
29 to emotional distress in infants at high-risk for autism spectrum disorder. *Journal of Clinical*  
30 *and Experimental Neuropsychology* 2018;40(5):487-501. doi:  
31 10.1080/13803395.2017.1372368
- 32 88. Brian AJ, Roncadin C, Duku E, et al. Emerging cognitive profiles in high-risk infants with and  
33 without autism spectrum disorder. *Research in autism spectrum disorders* 2014;8(11):1557-  
34 66. doi: 10.1016/j.rasd.2014.07.021
- 35 89. Garon N, Zwaigenbaum L, Bryson S, et al. Temperament and its Association with Autism  
36 Symptoms in a High-risk Population. *Journal of abnormal child psychology* 2016;44(4):757-  
37 69. doi: 10.1007/s10802-015-0064-1 [published Online First: 2015/09/01]
- 38 90. Ozonoff S, Young GS, Brian J, et al. Diagnosis of Autism Spectrum Disorder After Age 5 in  
39 Children Evaluated Longitudinally Since Infancy. *Journal of the American Academy of Child*  
40 *and Adolescent Psychiatry* 2018;57(11):849-57.e2. doi: 10.1016/j.jaac.2018.06.022 [published  
41 Online First: 2018/11/06]
- 42 91. Bishop SL, Guthrie W, Coffing M, et al. Convergent Validity of the Mullen Scales of Early  
43 Learning and the Differential Ability Scales in Children with Autism Spectrum Disorders.  
44 *American Journal on Intellectual and Developmental Disabilities* 2011;116(5):331-43. doi:  
45 10.1352/1944-7558-116.5.331
- 46 92. Swineford LB, Guthrie W, Thurm A. Convergent and Divergent Validity of the Mullen Scales of  
47 Early Learning in Young Children With and Without Autism Spectrum Disorder.  
48 *Psychological Assessment* 2015;27(4):1364-78. doi: 10.1037/pas0000116
- 49 93. Akshoomoff N. Use of the Mullen Scales of Early Learning for the Assessment of Young Children  
50 with Autism Spectrum Disorders. *Child Neuropsychology* 2006;12(4-5):269-77. doi:  
51 10.1080/09297040500473714
- 52 94. Mullen EM. Mullen Scales of Early Learning. Circle Pines, MN: American Guidance Service.  
53 1995.
- 54  
55  
56  
57  
58  
59  
60



- 1  
2  
3 95. Einspieler C, Prechtl HFR. Prechtl's method on the qualitative assessment of general movements  
4 in preterm, term and young infants: London : Mac Keith Press  
5 Cambridge, UK  
6 New York : Distributed by Cambridge University Press 2004.  
7  
8 96. Haataja L, Mercuri E, Regev R, et al. Optimality score for the neurologic examination of the infant  
9 at 12 and 18 months of age. *J Pediatr* 1999;135(2 Pt 1):153-61. [published Online First:  
10 1999/08/04]  
11  
12 97. Maitre NL, Chorna O, Romeo DM, et al. Implementation of the Hammersmith Infant Neurological  
13 Examination in a High-Risk Infant Follow-Up Program. *Pediatric Neurology* 2016;65:31-38.  
14 doi: 10.1016/j.pediatrneurol.2016.09.010  
15  
16 98. Romeo DM, Brogna C, Sini F, et al. Early psychomotor development of low-risk preterm infants:  
17 Influence of gestational age and gender. *European Journal of Paediatric Neurology*  
18 2016;20(4):518-23. doi: 10.1016/j.ejpn.2016.04.011  
19  
20 99. Chatziioannidis I, Kyriakidou M, Exadaktylou S, et al. Neurological outcome at 6 and 12 months  
21 corrected age in hospitalised late preterm infants -a prospective study. *European Journal of*  
22 *Paediatric Neurology* 2018;22(4):602-09. doi: 10.1016/j.ejpn.2018.02.013  
23  
24 100. Briggs-Gowan M, Carter A. Infant Toddler Social & Emotional Assessment (ITSEA)  
25 Manual.2001.  
26  
27 101. Carter A, Briggs-Gowan M. ITSEA: Infant-Toddler Social and Emotional Assessment.  
28 Massachusetts: PsychCorp 2006.  
29  
30 102. Wetherby AM, Woods J, Allen L, et al. Early Indicators of Autism Spectrum Disorders in the  
31 Second Year of Life. *Journal of autism and developmental disorders* 2004;34(5):473-93. doi:  
32 10.1007/s10803-004-2544-y  
33  
34 103. Eadie PA, Ukoumunne O, Skeat J, et al. Assessing early communication behaviours: structure  
35 and validity of the Communication and Symbolic Behaviour Scales Developmental Profile  
36 (CSBS-DP) in 12-month-old infants. *International Journal of Language & Communication*  
37 *Disorders, 2010, Vol45(5), p572-585* 2010;45(5):572-85. doi: 10.3109/13682820903277944  
38  
39 104. Vliegen N, Luyten P, Biringen Z. A Multimethod Perspective on Emotional Availability in the  
40 Postpartum Period. *Parenting* 2009;9(3-4):228-43. doi: 10.1080/15295190902844514  
41  
42 105. Luyten P, Mayes LC, Nijssens L, et al. The parental reflective functioning questionnaire:  
43 Development and preliminary validation. *PloS one* 2017;12(5):e0176218. doi:  
44 10.1371/journal.pone.0176218  
45  
46 106. Gloster AT, Rhoades HM, Novy D, et al. Psychometric properties of the Depression Anxiety and  
47 Stress Scale-21 in older primary care patients. *Journal of affective disorders* 2008;110(3):248-  
48 59. doi: 10.1016/j.jad.2008.01.023 [published Online First: 03/04]  
49  
50  
51  
52  
53  
54  
55  
56  
57  
58  
59  
60

# BMJ Open

## ENACT (ENvironmental enrichment for infants; parenting with Acceptance and Commitment Therapy): A randomised controlled trial of an innovative intervention for infants at risk of Autism Spectrum Disorder

|                                 |                                                                                                                                                                                                                                                                                                                                                                                                                                                                                                                                                                                                                                                                                                                                                                                                                                |
|---------------------------------|--------------------------------------------------------------------------------------------------------------------------------------------------------------------------------------------------------------------------------------------------------------------------------------------------------------------------------------------------------------------------------------------------------------------------------------------------------------------------------------------------------------------------------------------------------------------------------------------------------------------------------------------------------------------------------------------------------------------------------------------------------------------------------------------------------------------------------|
| Journal:                        | <i>BMJ Open</i>                                                                                                                                                                                                                                                                                                                                                                                                                                                                                                                                                                                                                                                                                                                                                                                                                |
| Manuscript ID                   | bmjopen-2019-034315.R1                                                                                                                                                                                                                                                                                                                                                                                                                                                                                                                                                                                                                                                                                                                                                                                                         |
| Article Type:                   | Protocol                                                                                                                                                                                                                                                                                                                                                                                                                                                                                                                                                                                                                                                                                                                                                                                                                       |
| Date Submitted by the Author:   | 20-Feb-2020                                                                                                                                                                                                                                                                                                                                                                                                                                                                                                                                                                                                                                                                                                                                                                                                                    |
| Complete List of Authors:       | Whittingham, Koa; The University of Queensland, Queensland Cerebral palsy Research centre; The University of Queensland<br>McGlade, Andrea; The University of Queensland, Queensland Cerebral Palsy and Rehabilitation Research Centre, UQ Child Health Research Centre, Faculty of Medicine<br>Kulasinghe, Kavindri; The University of Queensland, Queensland Cerebral Palsy and Rehabilitation Research Centre, UQ Child Health Research Centre, Faculty of Medicine<br>Mitchell , AE ; University of Queensland, Parenting and Family Support Centre, School of Psychology<br>Heussler, Honey; Mater Medical Research Institute<br>Boyd, Roslyn; The University of Queensland, Queensland Cerebral Palsy and Rehabilitation Research Centre; The University of Queensland, Queensland Children's Medical Research Institute |
| <b>Primary Subject Heading</b>: | Paediatrics                                                                                                                                                                                                                                                                                                                                                                                                                                                                                                                                                                                                                                                                                                                                                                                                                    |
| Secondary Subject Heading:      | Paediatrics, Public health                                                                                                                                                                                                                                                                                                                                                                                                                                                                                                                                                                                                                                                                                                                                                                                                     |
| Keywords:                       | Autism Spectrum Disorder, early intervention, maternal mental health, parent-infant interaction, infant development                                                                                                                                                                                                                                                                                                                                                                                                                                                                                                                                                                                                                                                                                                            |
|                                 |                                                                                                                                                                                                                                                                                                                                                                                                                                                                                                                                                                                                                                                                                                                                                                                                                                |

SCHOLARONE™  
Manuscripts



I, the Submitting Author has the right to grant and does grant on behalf of all authors of the Work (as defined in the below author licence), an exclusive licence and/or a non-exclusive licence for contributions from authors who are: i) UK Crown employees; ii) where BMJ has agreed a CC-BY licence shall apply, and/or iii) in accordance with the terms applicable for US Federal Government officers or employees acting as part of their official duties; on a worldwide, perpetual, irrevocable, royalty-free basis to BMJ Publishing Group Ltd ("BMJ") its licensees and where the relevant Journal is co-owned by BMJ to the co-owners of the Journal, to publish the Work in this journal and any other BMJ products and to exploit all rights, as set out in our [licence](#).

The Submitting Author accepts and understands that any supply made under these terms is made by BMJ to the Submitting Author unless you are acting as an employee on behalf of your employer or a postgraduate student of an affiliated institution which is paying any applicable article publishing charge ("APC") for Open Access articles. Where the Submitting Author wishes to make the Work available on an Open Access basis (and intends to pay the relevant APC), the terms of reuse of such Open Access shall be governed by a Creative Commons licence – details of these licences and which [Creative Commons](#) licence will apply to this Work are set out in our licence referred to above.

Other than as permitted in any relevant BMJ Author's Self Archiving Policies, I confirm this Work has not been accepted for publication elsewhere, is not being considered for publication elsewhere and does not duplicate material already published. I confirm all authors consent to publication of this Work and authorise the granting of this licence.

1  
2  
3 **ENACT (ENvironmental enrichment for infants; parenting with Acceptance and Commitment**  
4 **Therapy): A randomised controlled trial of an innovative intervention for infants at risk of**  
5 **Autism Spectrum Disorder**  
6  
7  
8  
9

10 Koa Whittingham<sup>1</sup>, Andrea McGlade<sup>1</sup>, Kavindri Kulasinghe<sup>1</sup>, Amy E. Mitchell<sup>2</sup>, Honey Heussler<sup>3,4</sup>,  
11 & Roslyn N. Boyd<sup>1</sup>

12 <sup>1</sup>Queensland Cerebral Palsy and Rehabilitation Research Centre, Faculty of Medicine, UQ Child  
13 Health Research Centre  
14

15 The University of Queensland, Brisbane, Australia;  
16

17 <sup>2</sup>Parenting and Family Support Centre, School of Psychology, The University of Queensland, Brisbane,  
18 Australia.  
19

20 <sup>3</sup> UQ Child Health Research Centre, Faculty of Medicine, The University of Queensland, Brisbane,  
21 Australia  
22

23 <sup>4</sup>Centre for Clinical Trials in Rare Neurodevelopmental Disorders, Child Development Program, Child  
24 Youth and Community Health Services, Children's Health Queensland, Brisbane, Australia.  
25  
26  
27  
28  
29

30 **Running head:** ENACT (ENvironmental enrichment for infants; parenting with Acceptance and  
31 Commitment Therapy)  
32  
33  
34  
35

36 **Registered with:** Australian New Zealand Clinical Trials Registry (ACTRN12618002046280p)  
37 registered 21/12/2018; Universal Trial Number (U1111-1224-6536)  
38  
39  
40

41 **Acknowledgements:**

42 This work was supported by two University of Queensland Graduate School Scholarships (AM and  
43 KK), a Children's Hospital Foundation Early Career Fellowship (AEM; award ref. no. 50223), an  
44 NHMRC Research Fellowship (RNB; 1105038) and a philanthropic donation.  
45  
46  
47  
48  
49

50 **Declaration of Interest:**

51 None  
52  
53  
54

55 **Address for Correspondence:**

56 Dr Koa Whittingham

57 Queensland Cerebral Palsy and Rehabilitation Research Centre, The University of Queensland  
58 Level 6, Centre for Children's Health Research  
59  
60

1  
2  
3 62 Graham Street

4  
5 South Brisbane 4101

6  
7 Email: [koawhittingham@uq.edu.au](mailto:koawhittingham@uq.edu.au)  
8  
9

10 **Author contributions** All authors contributed to the conception and design of this study. KW and  
11 AM designed the ENACT intervention. KK, KW and AEM contributed to the design in terms of  
12 parental mental health and parent-child relationship assessment. AM, KW, HH and RNB contributed  
13 to the design in terms of motor, cognitive and autistic symptomatology assessment. All authors  
14 contributed to drafting and critical revision of the manuscript. All authors approved the final version  
15 of the manuscript to be submitted for publication.  
16  
17  
18  
19  
20  
21  
22  
23  
24  
25  
26  
27  
28  
29  
30  
31  
32  
33  
34  
35  
36  
37  
38  
39  
40  
41  
42  
43  
44  
45  
46  
47  
48  
49  
50  
51  
52  
53  
54  
55  
56  
57  
58  
59  
60

## Abstract

**Introduction:** Autism spectrum disorder (ASD) is a heterogeneous neurodevelopmental condition with impacts on behaviour, cognition, communication, social interaction and family mental health. This paper reports the protocol of a randomised controlled trial (RCT) of a very early intervention ENACT (ENvironmental enrichment for infants; parenting with Acceptance and Commitment Therapy) for families of infants at risk of ASD.

**Methods and analysis:** We aim to recruit 66 mothers of infants at risk of ASD (i.e., infants with a sibling or parent diagnosed with ASD) to this randomised controlled trial (RCT). Families will be randomly assigned to care-as-usual or ENACT. ENACT is a very early intervention, leveraging parent-child interactions to improve early social reciprocity, while supporting parental mental health and the parent-child relationship through Acceptance and Commitment Therapy (ACT). Intervention content is delivered online (approximately 8 hours) and supported by consultations (7+) with a clinician. Parents will perform the social reciprocity intervention with their child (30 minutes per day). Assessments at four time points (baseline; 3 months, 6 months and 12 months corrected age) will assess parent-infant interaction, parental mental health, infant development and early ASD markers. Analysis will be by intention to treat using general linear models for RCTs.

**Ethics and dissemination:** This protocol has been approved by the Children's Health Queensland Hospital and Health Service Human Research Ethics Committee (HREC/19/QCHQ/50131) and The University of Queensland Human Research Ethics Committee (2019000558). If efficacy is demonstrated, the intervention has the potential for wide and accessible dissemination.

**Registration details:** This trial has been registered with the Australian New Zealand Clinical Trials Registry (ACTRN12618002046280p).

## Article Summary

### Strengths and Limitations of this study

- First RCT to test a very early intervention for infants at risk of ASD implemented within the first 6 months of life.
- ENACT combines parent-mediated very early intervention with parental mental health support.
- Assessment includes neurodevelopmental and neurophysiological assessments, as well as observations of parent-child interaction.
- ENACT could, if effective, be widely disseminated at little cost.

1  
2  
3  
4  
5  
6  
7  
8  
9  
10  
11  
12  
13  
14  
15  
16  
17  
18  
19  
20  
21  
22  
23  
24  
25  
26  
27  
28  
29  
30  
31  
32  
33  
34  
35  
36  
37  
38  
39  
40  
41  
42  
43  
44  
45  
46  
47  
48  
49  
50  
51  
52  
53  
54  
55  
56  
57  
58  
59  
60

**Keywords:** Autism Spectrum Disorder, early intervention, maternal mental health, parent-infant interaction, infant development

**Word** **count:** 3871

For peer review only

## INTRODUCTION

### Autism Spectrum Disorder and the Broader Autism Phenotype

Autism spectrum disorder (ASD) is a heterogeneous neurodevelopmental condition defined by difficulties in social communication and interaction, and repetitive, restricted interests and activities<sup>1 2</sup>. It evolves from a complex interaction between genes and environment<sup>3 4</sup>, and has substantial impact on affected individuals, with 65% having a profound or severe activity limitation, needing help or supervision with communication, self-care and/or mobility<sup>5</sup>. Prevalence rates are 0.7% and 1.7-2.5% in Australia and the United States, respectively<sup>5-7</sup>. Diagnosis rests on developmental assessment and behavioural observations with most children 2 years or older at diagnosis<sup>8</sup>.

Infant siblings of children with ASD are at an increased risk of ASD themselves, with prevalence estimates of 18-20% from baby sibling studies<sup>9 10</sup>. A further 25% show elevated scores on the Autism Diagnostic Observation Schedule (ADOS), developmental delays and lower adaptive functioning<sup>11-13</sup>. Prospective sibling studies have identified a range of non-specific markers in infants at high-risk of ASD, including motor delays, poor visual reception, language delays, regulatory difficulties and changes in eye gaze at 6-12 months that precede the appearance of autism-specific features in the second year of life<sup>14-18</sup>. The diversity of early markers precludes a single developmental pathway to ASD and has been called 'the first year puzzle'<sup>19-23</sup>. Non-specific developmental markers may interact leading to increasingly abnormal trajectories of infant development. Visual, motor and regulatory difficulties may impact on emerging attention and emotional regulation<sup>19 24-26</sup>. Differences in visual, motor and regulatory abilities at six months of age correspond in timing with changes in whole-brain functional connectivity on MRI studies<sup>27 28</sup>. At 6 months of age, functional connectivity on diffusion tensor imaging MRI correctly predicted 9 of 11 infants that went on to be diagnosed with ASD at 24 months of age<sup>29</sup>. These findings support the conjecture that the developmental cascade leading to ASD begins early, *within the first six months of life*<sup>28</sup>.

To date, nine randomised controlled trials (RCTs) have tested parent-mediated early interventions with infants at risk of ASD implemented in the first 24 months, prior to confirmed ASD diagnosis<sup>30-36</sup>. Only one of these, an RCT of iBASIS-VIPP conducted with 54 infants at high familial risk of ASD recruited at 7-10 months of age has demonstrated sustained reduction of ASD related symptoms, but no change in the diagnostic outcome at 3 years<sup>30 34</sup>. To date, no RCT has commenced with at-risk infants *younger than six months of age*, before earliest ASD markers and commencement of the cascade.

### ASD in the Family Context



Poor maternal mental health contributes to poorer long-term outcomes for infants, including those at risk of ASD<sup>37</sup>. Parents of children with ASD are at increased risk for depression and anxiety<sup>38 39</sup>, both due to parenting challenges and pre-existing histories<sup>40-42</sup>. Parents of infants with ASD are more likely to have an ASD or the Broader Autism Phenotype (BAP)<sup>43-46</sup>. The BAP may include rigidity, aloofness, social and communication difficulties<sup>46</sup>, with increased risk of depressive symptomatology, maladaptive coping and decreased social support<sup>46</sup>.

Mental health difficulties can contribute to reductions in responsive parenting<sup>47</sup>. Responsive parenting— child-directed, contingent, prompt, and appropriate to the child’s needs— is associated with better child outcomes<sup>48 49</sup>. Responsiveness is a dose-control system for environmental enrichment, enabling the child to obtain the necessary ‘experience expectant development’<sup>50 51</sup>. If a child is difficult to read, sends atypical or unclear signals, as in ASD, it is more challenging for parents to cultivate responsive patterns of interaction<sup>52</sup>.

By six months infants at risk of ASD may be showing an atypical style of interaction, with difficulty engaging in eye contact and joint attention<sup>15 26 49 53 54</sup>. Parent behaviour may shift towards intrusive parenting and high intensity approach behaviours in an attempt foster engagement and overcome the emerging social limitations of ASD<sup>49 55</sup>. The shift to directive parenting may impact further on the infant’s social development<sup>49 56</sup>. Importantly, commencing parent focused intervention *prior to six months*, before the shift towards directive parenting, has not been tested.

## **Aim**

To test the efficacy of ENACT (ENvironmental enrichment for infants; parenting with Acceptance and Commitment Therapy) for families of infants at risk of ASD via an RCT comparing ENACT to care-as-usual (CAU). ENACT is a newly-developed, very early intervention that targets infants’ social reciprocity through supported parent-infant interactions, while simultaneously supporting parental mental health and the parent-child relationship. ENACT commences prenatally.

## **Hypotheses**

We predict that families allocated to ENACT will show better outcomes compared to families allocated to CAU in terms of having:

### **Primary outcomes**

- H1: Lower scores for ASD symptomatology at as assessed on (a) the AOSI<sup>57 58</sup> at 12 months and (b) the greater ease of disengagement and greater reduction in the gap effect (reaction time

at overlap minus reaction time at gap) on the Gap-Overlap task at 12 months in comparison to 6 months<sup>59 60</sup>.

### ***Secondary outcomes***

- H2: Better scores on measures of parents' mental health at 3, 6 and 12 months as assessed on the Depression Anxiety and Stress Scales (DASS-21) and the Acceptance and Action Questionnaire (AAQ-II)<sup>61 62</sup>.
- H3: Improved parent-infant interaction, with greater emotional availability and parental sensitivity, less parental intrusiveness, and greater child responsiveness, as assessed on the Emotional Availability Scales (EAS) Self-Report at 3, 6 and 12 months and Observed<sup>63</sup> at 6 months.
- H4: Higher scores on measures of (a) infants' cognitive development, assessed using the Mullen Scales of Early Learning- Early Learning Composite at 6 and 12 months (MSEL-ELC; composite of the sub-domains of Visual Reception [VR], Fine Motor [FM], Receptive Language [RL] and Expressive Language [EL]),<sup>64</sup> and (b) infants' adaptive skills, assessed using the Vineland Adaptive Behaviour Scales Third Edition (VABS-3)<sup>65</sup> at 12 months.
- H5: Higher scores on measures of infants' (a) motor development at 6 and 12 months assessed using the Hammersmith Infant Neurological Examination; (HINE<sup>66 67</sup>) and (b) fine and gross motor abilities (assessed using the MSEL)<sup>68</sup>.
- H6: Higher scores on measures of infants' visual perceptual skills at 6 and 12 months, assessed on the Visual Reception scores on the MSEL<sup>24</sup>, and on symbolic cluster on the Communication and Symbolic Behaviour Scales – Developmental Profile (CSBS-DP)<sup>69</sup> and with reduced times on the Gap-Overlap task.
- H7: Higher scores on measures of infant language development at 6 and 12 months, assessed by the Receptive Language and Expressive Language domains on the MSEL<sup>70</sup> and CSBS-DP<sup>71</sup>.
- H8: Better scores on parent-report measures of infant regulation – specifically, (a) lower scores for Internalising and Externalising Behaviour, assessed on the Infant-Toddler Social and Emotional Assessment (ITSEA) at 12 months;<sup>72</sup> (b) lower scores on the Dysregulation scales of the ITSEA at 12 months; (c) better sleep on the Brief Infant Sleep Questionnaire (BISQ) at 3 and 6 months;<sup>73</sup> and (d) less cry behaviours on the Crying Pattern Questionnaire (CPQ) at 3 and 6 months of age<sup>74</sup>.

## **METHODS AND ANALYSIS**

### **Design**

1  
2  
3 The study is an RCT following CONSORT guidelines. After enrolment, and baseline assessments,  
4 mothers of infants at risk of ASD will be randomly allocated to intervention (ENACT) or CAU.  
5 Comparison to CAU is appropriate as ENACT is a newly developed intervention and this is the first  
6 trial. The CONSORT flow chart is depicted in Figure One.  
7  
8  
9

10 [insert Figure One about here]  
11  
12

### 13 **Recruitment**

14 Families will be recruited via advertisements distributed through Queensland ASD family support  
15 groups, schools and clinics (e.g. Autism Queensland, AEIOU Foundation for Children with Autism,  
16 Asperger Services Australia, Minds and Hearts) and Queensland Health Antenatal and Child  
17 Development Clinics. Mothers will be recruited during the third trimester of pregnancy.  
18  
19  
20  
21  
22

### 23 **Inclusion criteria**

24 Participants must meet the following inclusion criteria: (1) the infant must have one or more biological  
25 siblings or a biological parent (mother or father) diagnosed with ASD; (2) the mother must agree to  
26 the assessment requirements; (3) the mother must have reliable internet access (e.g. ADSL); and (4)  
27 the mother must have sufficient English to complete assessments.  
28  
29  
30  
31  
32

### 33 **Exclusion criteria**

34 Any infant with known neurological or chromosomal disorder at the point of recruitment.  
35  
36  
37

### 38 **Sample size**

39 The target number of participants is 66 (ENACT n=33, CAU n=33), which will provide power of 80%  
40 (two-tailed,  $\alpha=0.05$ ) to detect a difference between groups of 0.75 SD on the AOSI. In a previous study  
41 with a similar sample the observed SD=4;<sup>30</sup> consequently we should be able to observe a difference of  
42  $\geq 3$  units in this study.  
43  
44  
45  
46  
47

### 48 **Blinding**

49 Participants and intervention delivery facilitators cannot be blinded to group allocation. Assessors  
50 conducting the AOSI, Gap-Overlap task, MSEL and HINE assessments at 12 months CA will be  
51 blinded to group allocation, as will coders scoring the video/audio-recorded EAS observations, GMA,  
52 and Gap-Overlap task.  
53  
54  
55  
56

### 57 **Care-as-Usual interventions for infants at risk of ASD**

58  
59  
60

1  
2  
3 Participants allocated to CAU will receive usual postnatal care. As developmental and autism-related  
4 concerns generally present after 12 months of age, it is expected that any targeted interventions  
5 provided in the community by usual care providers will fall outside the timeframe of the study.  
6  
7  
8

### 9 **The ENACT Intervention**

10 ENACT is a very early intervention targeting infant social reciprocity through supported parent-child  
11 interactions while simultaneously supporting parental mental health and the parent-child relationship  
12 using ACT. Core to ENACT is the social reciprocity intervention which teaches mothers to initiate  
13 and build sensitivity chains with their babies, with the goal that sensitivity chains become longer,  
14 increasingly complex and increasingly symbolic over time, and that the early social development of  
15 the infant is optimally supported. They should be mutually enjoyable, responsive and non-intrusive.  
16  
17  
18  
19  
20  
21  
22

23 The three simple steps to building a sensitivity chain are for the mother to 1) stimulate an initial  
24 enjoyable interaction, 2) *wait* for the infant to signal their intent to continue, and 3) respond to the  
25 infant's signal, hence 'closing the loop' and building a link in the sensitivity chain. This will include  
26 a focus on: initially cultivating sensitivity chains through sensorimotor activities, using positive affect  
27 and predictable surprise to support the infant's involvement, maintaining reciprocal interactions with  
28 infants with atypical responsiveness, and avoiding parental intrusiveness with atypically responsive  
29 infants. This intervention is specifically targeting the earliest documented abnormalities in social  
30 behaviour in infants at risk of ASD<sup>75</sup>. This aspect of the ENACT intervention was developed  
31 specifically for this trial by Andrea McGlade, with input from Koa Whittingham.  
32  
33  
34  
35  
36  
37  
38  
39

40 ENACT also incorporates parental mental health support grounded in ACT, including values,  
41 mindfulness, experiential acceptance and cognitive defusion (distancing from thoughts). The ACT  
42 component within ENACT draws from a previously trialled intervention<sup>47</sup>. ENACT also contains a  
43 small psychoeducation component on common early parenting challenges of sleep, crying and feeding,  
44 developed by Koa Whittingham<sup>76</sup>. This focusses on understanding the biological regulation of sleep  
45 via the circadian clock and the sleep-wake homeostat, understanding the developmental pattern of  
46 infant crying including the crying peak, and planning ahead on where to seek help for feeding  
47 challenges.  
48  
49  
50  
51  
52  
53  
54

55 ENACT is delivered to mothers (i) via an online course (approximately 8 hours' duration) using the  
56 edX platform ([www.edx.org/](http://www.edx.org/)) and (ii) through telehealth (videoconferencing via Zoom) consultations  
57 with a trained clinician. The edX course includes: videos and text explaining core concepts, interactive  
58  
59  
60

1  
2  
3 exercises, multiple choice questions, and videos of real parent-and-baby interactions. The social  
4 reciprocity very early intervention is delivered to the infant through the mother and other caregivers.  
5 Intervention delivery to mothers will commence prenatally, and mothers will receive fortnightly  
6 sessions with the clinician to support consolidation of learning. Mothers will be encouraged to work  
7 through the edX course at their own pace, with completion before their babies reach 8 weeks of age.  
8  
9

10  
11  
12  
13 Mothers will be encouraged to engage in regular practice of sensitivity chains, with a goal dose of 30  
14 minutes per day/5 days per week from 2 weeks of age and throughout the first year (total dose  
15 approximately 125 hours). The social reciprocity intervention will be integrated into ordinary everyday  
16 interactions including feeding, nappy changes and playful interactions. Consultation sessions will be  
17 conducted when the infant is 4 weeks, 8 weeks, 12 weeks, 4 months, 6 months, 8 months and 10  
18 months of age, with capacity for additional sessions as needed. Consultations will support mothers in  
19 finding opportunities to practice within everyday life, in tailoring interactions to their babies, and in  
20 adapting to their babies' developmental stage and skills. Mothers will be encouraged to initiate a  
21 sensitivity chain during the consultation, for the clinician's direct observation and feedback. In  
22 addition, clinical consultations will refer to ACT components, supporting maternal mental health  
23 throughout the first year. Clinical consultations will follow a specific protocol, and be recorded for  
24 fidelity. See Table 1.  
25  
26  
27  
28  
29  
30  
31  
32  
33

34  
35  
36 [insert Table 1 about here]  
37  
38

39 The primary target for recruitment and the intervention will be the mother, who will act as conduit to  
40 each infant's caregiving system. Other caregivers (e.g. fathers, grandparents) will be given access to  
41 the ENACT edX course and will be welcome to participate in clinical consultations as applicable.  
42 Mothers will also be encouraged to teach all other significant caregivers the sensitivity chain  
43 intervention via direct demonstration.  
44  
45  
46  
47  
48

### 49 **Fidelity**

50  
51 The study clinician will receive clinical supervision from Dr Koa Whittingham to support fidelity.  
52 Course completion will be checked by the clinician. Clinical consultations will follow a specific  
53 protocol and will be recorded; 20% will be checked for fidelity (content and process) against the  
54 protocol.  
55  
56  
57  
58

### 59 **Patient and Public Involvement**

60

1  
2  
3 Consumer feedback was sought on the protocol, the study forms and the intervention.  
4  
5

## 6 **Study Procedure**

7  
8 Researchers will contact interested mothers to assess eligibility and provide detailed study information  
9 (see supplementary file: study information sheet and consent form). Mothers will provide written  
10 consent prior to completing baseline assessments, and computer-generated block randomisation will  
11 then be used to randomise families (1:1) to intervention or CAU via REDcap. Families allocated to  
12 intervention will receive immediate access to ENACT. Families allocated to CAU will receive routine  
13 antenatal and postnatal care.  
14  
15  
16  
17

18  
19 Assessments will be conducted at baseline (prenatal), 3, 6, and 12 months CA. Parents will complete  
20 questionnaire measures online; mother-child relationship observations will be conducted via 20-  
21 minute video-recorded interactions; and child development assessments will be undertaken at [blinded  
22 for review] at 6 and 12 months of age. While completing ENACT, parents will be invited to provide  
23 feedback and suggestions for course improvement.  
24  
25  
26  
27  
28

## 29 **Measures**

### 30 **BASELINE ASSESSMENTS**

31  
32 The *Parent Questionnaire* collects (1) general demographic information (parent age, education,  
33 income, family composition) and (2) information relevant to the ASD context, such as parent health  
34 history, and details of the diagnosis of the first-degree relative (parent or sibling) with ASD. Further  
35 information regarding infant delivery, perinatal history, and feeding history will be collected  
36 postnatally by brief phone interview  
37  
38  
39  
40  
41  
42

43 The *Broad Autism Phenotype Questionnaire (BAPQ; 36-items)* assesses ASD-like features in adults  
44 through self-report or informant measure<sup>77</sup>. Participants rate how much each item applies to them on  
45 a 6-point Likert scale<sup>78</sup>. Internal consistency for the total scale is excellent ( $\alpha=.95$ ) and there is good  
46 inter-item reliability<sup>78</sup>.  
47  
48  
49

### 50 **CHILD ASSESSMENTS**

#### 51 **Autism symptomatology**

52  
53 The *Autism Observation Schedule in Infants (AOSI; 12 months)* will be the primary clinical outcome  
54 measure assessing intervention effect on infant development and severity of autism symptomatology  
55 at 12 months<sup>58</sup>. It is an experimenter-led, semi-structured observational assessment tool, developed for  
56 research purposes to study the emergence of ASD-related behavioural markers in infancy (6–18  
57  
58  
59  
60

months)<sup>57 58</sup>. Five standardised activities are delivered between two periods of free play, with a total of 18 items to be scored. Inter-rater reliability of total marker counts (number of items marked as atypical) and total scores, respectively, is good at 6 months (.68 and .74) and excellent at 12 months (.92 and .93)<sup>57</sup>. Test-retest reliability for total marker counts and total scores is fair to good at .68 and .61, respectively<sup>57</sup>. The AOSI differentiates between high-risk and low-risk infants at 12-14 months<sup>79-81</sup>.

The *Gap-Overlap task (6 and 12 months)*<sup>59</sup> is used to assess visual attention by measuring differences in the efficiency of orienting towards peripheral stimuli. A mix of social and non-social stimuli will be used. Two trial types will be contrasted: Gap and Overlap. In the Gap condition, an interval of 200-250ms separates the disappearance of the central stimulus and the appearance of the peripheral one (facilitation). In the Overlap condition, the central stimulus remains visible and overlaps with the peripheral stimulus. This measures the ability to disengage from a central stimulus and to orient to a peripheral one. This difference between the Gap and Overlap times is called the Gap effect. Gap-Overlap time, measured in milliseconds, decreases from 6 to 12 months for typically developing infants<sup>15 82 83</sup>. Infants who are later diagnosed with ASD consistently show an *increase* in Gap-Overlap time between 6 and 12 months of age<sup>15 84 85</sup>. This has been called 'sticky attention'. Test-retest reliability of the Gap-Overlap gap effect is  $r=.50$  in infants at age 10 months<sup>59</sup>.

### Neurodevelopmental and motor assessments

The *Mullen Scales of Early Learning (MSEL; 6 and 12 months)* has been used in the cognitive assessment of infants and children from birth until 68 months of age<sup>30 32 86-88</sup>. The MSEL has five scales: Gross Motor [GM], Visual Reception [VR], Fine Motor [FM], Expressive Language [EL], and Receptive Language [RL], as well as an Early Learning Composite (ELC) score that is composed of the VR, FM, EL, and RL subscales. The MSEL has demonstrated convergent and divergent construct validity in infants and children with ASD<sup>89-91</sup>. Interrater reliability has been reported as high ( $r = .91-.99$ )<sup>92</sup>.

The *General Movements Assessment (GMA; 3 months)* is a predictive and discriminative tool that assesses infants' spontaneous motor activity from pre-term to 20 weeks CA<sup>93</sup>. Scoring is completed from a videorecording with 2 full movement sequences required for pattern recognition (approximately 5 minutes)<sup>93</sup>. During the fidgety period from 9-20 weeks post-term, fidgety movements can be abnormal (exaggerated in amplitude and speed), sporadic (confined to a few body parts, never >3 seconds between 9-16 weeks CA), or absent (fidgety movements not present between 9-16 weeks CA)

1  
2  
3 (optimality scoring)<sup>93</sup>. Abnormal fidgety movements that are absent or abnormal at 12-14 weeks C.A  
4 are highly predictive of cerebral palsy as well as other neurodevelopmental disabilities including  
5 ASD<sup>94 95</sup>. The Baby Moves app will be used to film the videos and transfer the videos for assessment.  
6  
7  
8 GMA will be scored by accredited blinded assessors. It will be used as a predictive tool, to better  
9 understand the sample.  
10  
11  
12

13  
14 The *Hammersmith Infant Neurological Examination (HINE; 6 and 12 months)* is a standardised  
15 clinical neurodevelopmental assessment for infants from 2-24 months of age<sup>96</sup>. The HINE contains  
16 26 items across 5 domains, summed to provide a global optimality score, and can differentiate between  
17 low- and high-risk late preterm and term newborns at 6 and 12 months of age<sup>97-99</sup>.  
18  
19  
20  
21

22 The *Vineland Adaptive Behaviour Scale (3rd ed.; VABS-III; 12 months)* is a standardised measure of  
23 adaptive behaviour, completed by caregivers and scored by a blinded assessor<sup>65</sup>. Standard scores are  
24 generated for the four domains (Communication, Daily Living Skills, Socialization, and Motor Skills)  
25 as well as a global score (Adaptive Behaviour Composite). It has good internal consistency, test-retest  
26 reliability, inter-interviewer reliability, and validity for young children including those with autism<sup>65</sup>.  
27  
28  
29  
30  
31

### 32 **Infant regulation**

33 The *Brief Infant Sleep Questionnaire (BISQ; 10-items; 3 and 6 months)* assesses parent-reported infant  
34 sleep patterns (nocturnal sleep duration, night waking and method of falling asleep), parent perception  
35 of infant sleep duration, and sleep-related (parent) behaviours for children from birth-36 months. It is  
36 well validated by comparisons with actigraphy, sleep diaries and caregiver-reported sleep<sup>73 74</sup>.  
37  
38  
39  
40  
41

42 The *Crying Patterns Questionnaire (CPQ; 6-items; 3 and 6 months)* is a parent-report measure  
43 assessing: (1) the amount and time of day when infant crying occurs; (2) situations in which crying  
44 occurs; (3) whether the mother finds the crying distressing and seeks advice and help; and (4) the  
45 mother's responses to crying. In comparison to 24 hour cry-fuss diaries kept by mothers, the CPQ  
46 showed moderate-to-good validity (.51-.68) for total duration of crying scores<sup>74</sup>.  
47  
48  
49  
50

51 The *Infant Toddler Social & Emotional Assessment (ITSEA; 165-items; 12 months)* is a parent-report  
52 questionnaire used to assess social-emotional problems/competencies in the domains of behavioural  
53 dysregulation and competence. The ITSEA has established concurrent validity, strong test-retest  
54 reliability ( $\alpha=.75-.91$ ) and good internal reliability for each subscale ( $\alpha=.86$  for dysregulation,  $\alpha=.87$   
55 for externalising,  $\alpha=.85$  for internalising, and  $\alpha=.89$  for competence)<sup>100 101</sup>. The ITSEA has been  
56  
57  
58  
59  
60



1  
2  
3 validated for 12 months CA and discriminates between low- and high-risk infants, particularly within  
4 the domain of dysregulation<sup>72</sup>.  
5  
6

7  
8 *The Communication and Symbolic Behaviour Scales Developmental Profile (CSBS DP; 6 and 12*  
9 *months)* evaluates the symbolic abilities and communication skills of children aged 6-24 months<sup>69</sup>. It  
10 includes a 24-item Infant Toddler Checklist which is used as a developmental screening tool to detect  
11 autism<sup>102</sup>. The CSBS DP has excellent internal consistency ( $\alpha=.86-.92$ ), good test-retest reliability and  
12 good construct and concurrent validity<sup>69 103</sup>.  
13  
14  
15

### 16 17 18 **Mother-infant relationship**

19  
20 *Emotional Availability Scales (EAS; 6 months)*. Coders blind to intervention condition will use the  
21 EAS to score 20-minute naturalistic observations of parent-child interactions<sup>63</sup>. The parent-child  
22 interaction will occur in the family's own home, with the parent instructed to interact with their child  
23 as they normally would. The observations will be recorded via the videoconferencing software Zoom.  
24 The EAS is used to measure quality of parent-child relationships across six scales: parental sensitivity,  
25 parental structuring, parental non-intrusiveness, parental non-hostility, child responsiveness and child  
26 involvement<sup>63</sup>. The scales have high inter-rater reliability for the parent scales of sensitivity (.95),  
27 structuring (.87), non-intrusiveness (.81), non-hostility (.72) and the child scales of responsiveness (.87)  
28 and involvement (.87)<sup>104</sup>.  
29  
30  
31  
32  
33  
34  
35

36  
37 The *Emotional Availability - Self Report (EA-SR; 36-items; 3, 6 and 12 months)* is a parent-report  
38 questionnaire used to measure emotional availability in a dyadic relationship across 5 subscales:  
39 Intrusiveness, Hostility, Mutual Attunement, Affect Quality and Capacity to Involve the Parent.  
40 Reliability ranges from .71-.84 for all subscales except affect quality ( $\alpha=.49$ )<sup>104</sup>. All subscales (except  
41 for Intrusiveness) have moderate correlations with the corresponding EAS observed subscales, thus  
42 supporting the validity of the self-report measure<sup>104 105</sup>.  
43  
44  
45  
46  
47  
48

### 49 **Maternal mental health**

50  
51 The *Acceptance and Action Questionnaire (AAQ-II; 7-items; baseline, 3, 6 and 12 months)* is a self-  
52 report questionnaire measuring psychological flexibility, the key target of ACT<sup>62</sup>. The AAQ-II has  
53 good test-retest reliability and convergent validity and excellent internal consistency ( $\alpha=.94$ )<sup>62</sup>.  
54  
55  
56

57  
58 The *Depression Anxiety Stress Scales (DASS-21; 21-items; baseline, 3, 6 and 12 months)* assess  
59 symptoms of depression, anxiety, and stress in adults. The DASS-21 produces three subscales, each  
60

1  
2  
3 with good internal consistency: the Depression ( $\alpha=.91-.97$ ), Anxiety ( $\alpha =.81-.92$ ), and Stress  
4 ( $\alpha=.88-.95$ ) scales<sup>106</sup>, and a Total score. The DASS-21 has good convergent validity and acceptable  
5 discriminative validity<sup>106</sup>.  
6  
7  
8  
9

### 10 **Comparison group**

11 A comparison group of 30 healthy low risk infants will be recruited and assessed on the Gap-Overlap  
12 task and the HINE at 6 and 12 months, and the AOSI at 12 months. This comparison data will support  
13 the interpretation of results, particularly for the novel Gap-Overlap task. To participate, the low risk  
14 infant would need to have no first-degree relatives diagnosed with ASD, be born at term and have no  
15 other known developmental risk. The comparison group will be recruited through social media and  
16 word of mouth.  
17  
18  
19  
20  
21  
22  
23

### 24 **Data Collection and Management**

25 Data will be entered onto the REDCap database in a potentially individually identifiable format. Once  
26 de-identified, data will be stored in a re-identifiable format on a secure electronic database protected  
27 by the [blinded for review] secure server, and only accessible to members of the research team.  
28  
29  
30  
31

### 32 **Statistical Analysis**

33 Analysis (using STATA or SPSS) will follow standard methods for RCTs using comparisons between  
34 the two groups (e.g. general linear models, ANCOVA) and intention-to-treat analyses. Assumptions  
35 for parametric analyses will be assessed. Baseline scores will be included as covariates. Missing data  
36 will be handled using pro-rating and/or estimation maximisation depending upon the assessment and  
37 pattern of missingness.  
38  
39  
40  
41  
42  
43

### 44 **Monitoring**

#### 45 *Data monitoring*

46 As this is a trial of a very early intervention with low risk, a data monitoring committee is not required.  
47 Any adverse events, particularly negative developmental outcomes, will be recorded and reported to  
48 the ethics committees and in the published results.  
49  
50  
51  
52  
53

#### 54 *Harms*

55 This study should not pose risks beyond those of everyday living. Any participants experiencing undue  
56 psychological distress will be referred to their general practitioner. For infants scoring at high  
57 developmental risk on the GMA, HINE, MSEL or AOSI, infants' general practitioners/paediatricians  
58  
59  
60

1  
2  
3 and parents will be notified. All families will be sent a paediatrician's report detailing 12-month  
4 developmental assessment results.  
5  
6  
7

### 8 **Data Sharing Statement**

9  
10 Data will be made available in a public, open access repository. Deidentified data will be made  
11 conditionally available to other researchers with approval from the research team.  
12  
13  
14

## 15 **ETHICS AND DISSEMINATION**

16  
17 ENACT should support mothers' mental health and may also support infant development. Ethical  
18 approval has been obtained from the Children's Health Queensland Hospital and Health Service  
19 Human Research Ethics Committee (HREC/19/QCHQ/50131) and The University of Queensland  
20 Human Research Ethics Committee (2019000558) and the trial registered (Australian New Zealand  
21 Clinical Trials Registry, ACTRN12618002046280p). Study results will be disseminated through  
22 scientific journal publications and conference presentations. If shown to be effective, edX facilitates  
23 easy dissemination at minimal cost.  
24  
25  
26  
27  
28  
29

## 30 **DISCUSSION**

31  
32 This study will test the efficacy of an innovative, very early intervention for infants at risk of ASD,  
33 integrating early social reciprocity intervention with parental mental health and parent-child  
34 relationship support. Potential limitations include recruitment and retention of parents with significant  
35 caregiving responsibilities; possible over-estimation of anticipated effect size; substantial burden of  
36 assessment for mothers; use of parent-report measures of infant regulation; and limited ability to assess  
37 day-to-day intervention implementation by mothers in the home environment.  
38  
39  
40  
41  
42  
43  
44

45 **Funding Statement** This work is supported by two University of Queensland Graduate School  
46 Scholarships (UQGSS) (AG and KK), a Children's Hospital Foundation Early Career Fellowship  
47 (AEM; award ref. no. 50223), an NHMRC Research Fellowship (RNB; 1105038) and a private  
48 philanthropic donation.  
49  
50  
51

52 **Competing Interests Statement:** ENACT was developed from PACT, an intervention developed by  
53 researchers at The University of Queensland including Koa Whittingham and Roslyn Boyd. Andrea  
54 McGlade and Koa Whittingham developed the of the very early intervention component of edX.  
55 ENACT has been developed using the online platform edX.  
56  
57  
58  
59  
60

**Abbreviations:**

|    |          |                                                                                |
|----|----------|--------------------------------------------------------------------------------|
| 1  |          |                                                                                |
| 2  |          |                                                                                |
| 3  |          |                                                                                |
| 4  | AAQ-II   | Acceptance and Action Questionnaire                                            |
| 5  |          |                                                                                |
| 6  | ACT      | Acceptance and Commitment Therapy                                              |
| 7  |          |                                                                                |
| 8  | ADOS     | Autism Diagnostic Observation Schedule                                         |
| 9  |          |                                                                                |
| 10 | ASD      | Autism Spectrum Disorder                                                       |
| 11 | BAP      | Broad Autism Phenotype                                                         |
| 12 |          |                                                                                |
| 13 | BISQ     | Brief Infant Sleep Questionnaire                                               |
| 14 |          |                                                                                |
| 15 | CA       | Corrected age                                                                  |
| 16 | CAU      | Care as Usual                                                                  |
| 17 |          |                                                                                |
| 18 | CSBS-DP  | Communication and Symbolic Behaviour Scales – Developmental Profile            |
| 19 |          |                                                                                |
| 20 | CPQ      | Crying Pattern Questionnaire                                                   |
| 21 |          |                                                                                |
| 22 | DASS-21  | Depression Anxiety Stress Scale                                                |
| 23 | EAS      | Emotional Availability Scales                                                  |
| 24 |          |                                                                                |
| 25 | EA-SR    | Emotional Availability Scales – Self Report                                    |
| 26 |          |                                                                                |
| 27 | EL       | Expressive Language                                                            |
| 28 |          |                                                                                |
| 29 | ELC      | Early Learning Composite                                                       |
| 30 |          |                                                                                |
| 31 | ENACT    | ENvironmental enrichment for infants; parenting with Acceptance and Commitment |
| 32 |          | Therapy                                                                        |
| 33 |          |                                                                                |
| 34 | FM       | Fine Motor                                                                     |
| 35 |          |                                                                                |
| 36 | GMA      | General Movement Assessment                                                    |
| 37 |          |                                                                                |
| 38 | HINE     | Hammersmith Infant Neurological Examination                                    |
| 39 |          |                                                                                |
| 40 | ITSEA    | Infant-Toddler Social and Emotional Assessment                                 |
| 41 |          |                                                                                |
| 42 | MSEL     | Mullen Scales of Early Learning                                                |
| 43 |          |                                                                                |
| 44 | RCT      | Randomised Controlled Trial                                                    |
| 45 |          |                                                                                |
| 46 | RL       | Receptive Language                                                             |
| 47 |          |                                                                                |
| 48 | VABS-III | Vineland Adaptive Behaviour Scales Third Edition                               |
| 49 |          |                                                                                |
| 50 | VR       | Visual Reception                                                               |
| 51 |          |                                                                                |
| 52 |          |                                                                                |
| 53 |          |                                                                                |
| 54 |          |                                                                                |
| 55 |          |                                                                                |
| 56 |          |                                                                                |
| 57 |          |                                                                                |
| 58 |          |                                                                                |
| 59 |          |                                                                                |
| 60 |          |                                                                                |

TABLE 1: ENACT Intervention Components

| Component                                  | Timing                                                                           | Content                                                                                                                                                                                                                                                                                                                           |
|--------------------------------------------|----------------------------------------------------------------------------------|-----------------------------------------------------------------------------------------------------------------------------------------------------------------------------------------------------------------------------------------------------------------------------------------------------------------------------------|
| ENACT EdX Course                           |                                                                                  |                                                                                                                                                                                                                                                                                                                                   |
| Module 1: Very early intervention approach | Begins antenatally with completion before child is 8 weeks                       | Outlines the very early intervention approach or sensitivity chains and includes multiple videos of parents and babies. Includes advice on early parenting challenges.                                                                                                                                                            |
| Module 2: Living a meaningful life         | Begins antenatally with completion before child is 8 weeks                       | Grounded in ACT, focuses on values and living a rewarding life.                                                                                                                                                                                                                                                                   |
| Module 3: Willingness                      | Begins antenatally with completion before child is 8 weeks                       | Grounded in ACT, focuses on mindfulness, acceptance and defusion (undermining the literality of language) processes.                                                                                                                                                                                                              |
| Module 4: Relating to others               | Begins antenatally with completion before child is 8 weeks                       | Grounded in ACT, focuses on acceptance, compassion and flexible parenting.                                                                                                                                                                                                                                                        |
| Module 5: Extending early intervention     | Begins antenatally with completion before child is 8 weeks                       | Extends sensitivity chain practice for older babies and provides advice for parents of babies experiencing challenges.                                                                                                                                                                                                            |
| Teleconferencing clinical consultations    |                                                                                  |                                                                                                                                                                                                                                                                                                                                   |
| ENACT EdX course completion support        | As needed throughout course completion                                           | Focuses on parental understanding of the EdX course, implementation of anything that is immediately relevant, and developing plans for the application of ENACT post-birth.                                                                                                                                                       |
| Developmental Consultations                | At 4 weeks, 8 weeks, 12 weeks, 4 months, 6 months, 8 months and 10 months of age | Focuses on expanding and extending sensitivity chain practice, working through any challenges and flexibly supporting parents and parental implementation of sensitivity chain practice using ACT principles. Includes the demonstration of a sensitivity chain whenever possible with opportunities for reflection and feedback. |

## References

1. American Psychiatric A. Diagnostic and statistical manual of mental disorders : DSM-5. Fifth edition.. ed: Arlington, VA : American Psychiatric Publishing 2013.
2. Mandy WP, Charman T, Skuse DH. Testing the construct validity of proposed criteria for DSM-5 autism spectrum disorder. *Journal of the American Academy of Child and Adolescent Psychiatry* 2012;51(1):41-50. doi: 10.1016/j.jaac.2011.10.013 [published Online First: 2011/12/20]
3. Chaste P, Leboyer M. Autism risk factors: genes, environment, and gene-environment interactions. *Dialogues in clinical neuroscience* 2012;14(3):281-92.
4. Wender C.L.A. V-VJ. Challenge and Potential for Research on Gene-Environment Interactions in Autism Spectrum Disorder. In: P. T, B L, eds. Gene-Environment Transactions in Developmental Psychopathology: Springer, Cham 2017.
5. AIHW. Autism in Australia, 2017.
6. Kogan MD, Vladutiu CJ, Schieve LA, et al. The Prevalence of Parent-Reported Autism Spectrum Disorder Among US Children. *Pediatrics* 2018;142(6) doi: 10.1542/peds.2017-4161
7. Baio J, Wiggins L, Christensen DL, et al. Prevalence of Autism Spectrum Disorder Among Children Aged 8 Years — Autism and Developmental Disabilities Monitoring Network, 11 Sites, United States, 2014. *MMWR Surveillance Summaries* 2018;67(6):1-23. doi: 10.15585/mmwr.ss6706a1
8. Bent CA, Dissanayake C, Barbaro J. Mapping the diagnosis of autism spectrum disorders in children aged under 7 years in Australia, 2010–2012. *Medical Journal of Australia* 2015;202(6):317-20. doi: 10.5694/mja14.00328
9. Ozonoff S, Young GS, Carter A, et al. Recurrence risk for autism spectrum disorders: a Baby Siblings Research Consortium study. *Pediatrics* 2011;128(3):e488-95. doi: 10.1542/peds.2010-2825 [published Online First: 2011/08/17]
10. Messinger DS, Young GS, Webb SJ, et al. Early sex differences are not autism-specific: A Baby Siblings Research Consortium (BSRC) study. *Molecular autism* 2015;6:32. doi: 10.1186/s13229-015-0027-y [published Online First: 2015/06/06]
11. Charman T, Young GS, Brian J, et al. Non-ASD outcomes at 36 months in siblings at familial risk for autism spectrum disorder (ASD): A baby siblings research consortium (BSRC) study. *Autism research : official journal of the International Society for Autism Research* 2017;10(1):169-78. doi: 10.1002/aur.1669 [published Online First: 2016/07/16]
12. Shephard E, Milosavljevic B, Pasco G, et al. Mid-childhood outcomes of infant siblings at familial high-risk of autism spectrum disorder. *Autism research : official journal of the International Society for Autism Research* 2017;10(3):546-57. doi: 10.1002/aur.1733 [published Online First: 2016/11/30]
13. Miller M, Iosif AM, Young GS, et al. School-age outcomes of infants at risk for autism spectrum disorder. *Autism research : official journal of the International Society for Autism Research* 2016;9(6):632-42. doi: 10.1002/aur.1572 [published Online First: 2015/10/10]
14. Bedford R, Gliga T, Shephard E, et al. Neurocognitive and observational markers: prediction of autism spectrum disorder from infancy to mid-childhood. *Molecular autism* 2017;8:49. doi: 10.1186/s13229-017-0167-3 [published Online First: 2017/10/12]
15. Clifford SM, Hudry K, Elsabbagh M, et al. Temperament in the first 2 years of life in infants at high-risk for autism spectrum disorders. *Journal of autism and developmental disorders* 2013;43(3):673-86. doi: 10.1007/s10803-012-1612-y [published Online First: 2012/08/25]
16. Leonard HC, Bedford R, Charman T, et al. Motor development in children at risk of autism: a follow-up study of infant siblings. *Autism : the international journal of research and practice* 2014;18(3):281-91. doi: 10.1177/1362361312470037 [published Online First: 2013/10/09]

17. Sacrey LA, Armstrong VL, Bryson SE, et al. Impairments to visual disengagement in autism spectrum disorder: a review of experimental studies from infancy to adulthood. *Neuroscience and biobehavioral reviews* 2014;47:559-77. doi: 10.1016/j.neubiorev.2014.10.011 [published Online First: 2014/12/03]
18. Franchini M, Duku E, Armstrong V, et al. Variability in Verbal and Nonverbal Communication in Infants at Risk for Autism Spectrum Disorder: Predictors and Outcomes. *Journal of autism and developmental disorders* 2018;48(10):3417-31. doi: 10.1007/s10803-018-3607-9
19. Jones EJH, Gliga T, Bedford R, et al. Developmental pathways to autism: A review of prospective studies of infants at risk. *Neuroscience and biobehavioral reviews* 2014;39(100):1-33. doi: 10.1016/j.neubiorev.2013.12.001
20. Johnson MH, Gliga T, Jones E, et al. Annual research review: Infant development, autism, and ADHD--early pathways to emerging disorders. *Journal of child psychology and psychiatry, and allied disciplines* 2015;56(3):228-47. doi: 10.1111/jcpp.12328
21. Charman T. Mapping Early Symptom Trajectories in Autism Spectrum Disorder: Lessons and Challenges for Clinical Practice and Science. *Journal of the American Academy of Child and Adolescent Psychiatry* 2018;57(11):820-21. doi: 10.1016/j.jaac.2018.06.021 [published Online First: 2018/11/06]
22. Elsabbagh M, Johnson MH. Autism and the Social Brain: The First-Year Puzzle. *Biological psychiatry* 2016;80(2):94-99. doi: 10.1016/j.biopsych.2016.02.019 [published Online First: 2016/04/27]
23. Holmboe K, Elsabbagh M, Volein A, et al. Frontal cortex functioning in the infant broader autism phenotype. *Infant behavior & development* 2010;33(4):482-91. doi: 10.1016/j.infbeh.2010.05.004 [published Online First: 2010/07/09]
24. Estes A, Zwaigenbaum L, Gu H, et al. Behavioral, cognitive, and adaptive development in infants with autism spectrum disorder in the first 2 years of life. *Journal of neurodevelopmental disorders* 2015;7(1):24. doi: 10.1186/s11689-015-9117-6 [published Online First: 2015/07/24]
25. Trevarthen C, Delafield-Butt JT. Autism as a developmental disorder in intentional movement and affective engagement. *Frontiers in integrative neuroscience* 2013;7:49-49. doi: 10.3389/fnint.2013.00049
26. Tsang T. Mechanisms Conferring Risk versus Resilience for Autism Spectrum Disorder in Early Infancy. In: Dapretto M, Johnson SP, Bookheimer S, et al., eds.: ProQuest Dissertations Publishing, 2018.
27. Conti E, Sara E, Viviana E, et al. The first thousand days of the autistic brain: a systematic review of diffusion imaging studies. *Frontiers in Human Neuroscience* 2015;9 doi: 10.3389/fnhum.2015.00159
28. Wolff JJ, Jacob S, Elison JT. The journey to autism: Insights from neuroimaging studies of infants and toddlers. 2018;30(2):479-95. doi: 10.1017/S0954579417000980
29. Emerson RW, Adams C, Nishino T, et al. Functional neuroimaging of high-risk 6-month-old infants predicts a diagnosis of autism at 24 months of age. *Science translational medicine* 2017;9(393) doi: 10.1126/scitranslmed.aag2882 [published Online First: 2017/06/09]
30. Green J, Charman T, Pickles A, et al. Parent-mediated intervention versus no intervention for infants at high risk of autism: a parallel, single-blind, randomised trial. *The Lancet Psychiatry* 2015;2(2):133-40. doi: 10.1016/S2215-0366(14)00091-1
31. Baranek GT, Watson LR, Turner-Brown L, et al. Preliminary efficacy of adapted responsive teaching for infants at risk of autism spectrum disorder in a community sample. *Autism research and treatment* 2015;2015:386951. doi: 10.1155/2015/386951 [published Online First: 2015/02/05]
32. Watson LR, Crais ER, Baranek GT, et al. Parent-Mediated Intervention for One-Year-Olds Screened as At-Risk for Autism Spectrum Disorder: A Randomized Controlled Trial. *Journal*

- 1  
2  
3 *of autism and developmental disorders* 2017;47(11):3520-40. doi: 10.1007/s10803-017-3268-  
4 0 [published Online First: 2017/09/02]
- 5  
6 33. Whitehouse AJO, Varcin JK, Alvares GA, et al. Pre-emptive intervention versus treatment as usual  
7 for infant showing early behavioural risk signs of autism spectrum disorder: a single-blind,  
8 randomised controlled trial. *Lancet Child and Adolescent Health* 2019:30184-1.
- 9  
10 34. Green J, Pickles A, Pasco G, et al. Randomised trial of a parent-mediated intervention for infants  
11 at high risk for autism: longitudinal outcomes to age 3 years. *Journal of Child Psychology and*  
12 *Psychiatry* 2017;58(12):1330-40. doi: 10.1111/jcpp.12728
- 13  
14 35. Kasari C, Siller M, Huynh LN, et al. Randomized controlled trial of parental responsiveness  
15 intervention for toddlers at high risk for autism. *Infant Behavior and Development*  
16 2014;37(4):711-21. doi: 10.1016/j.infbeh.2014.08.007
- 17  
18 36. Jones EJH, Dawson G, Kelly J, et al. Parent-delivered early intervention in infants at risk for ASD:  
19 Effects on electrophysiological and habituation measures of social attention. *Autism research :  
20 official journal of the International Society for Autism Research* 2017;10(5):961-72. doi:  
21 10.1002/aur.1754 [published Online First: 2017/03/01]
- 22  
23 37. Zaidman-Zait A, Mirenda P, Duku E, et al. Examination of bidirectional relationships between  
24 parent stress and two types of problem behavior in children with autism spectrum disorder.  
25 *Journal of autism and developmental disorders* 2014;44(8):1908-17. doi: 10.1007/s10803-  
26 014-2064-3 [published Online First: 2014/02/20]
- 27  
28 38. Yorke I, White P, Weston A, et al. The Association Between Emotional and Behavioral Problems  
29 in Children with Autism Spectrum Disorder and Psychological Distress in Their Parents: A  
30 Systematic Review and Meta-analysis. *Journal of autism and developmental disorders*  
31 2018;48(10):3393-415. doi: 10.1007/s10803-018-3605-y [published Online First: 2018/05/20]
- 32  
33 39. Nicholas DB, Zwaigenbaum L, Ing S, et al. "Live It to Understand It": The Experiences of Mothers  
34 of Children With Autism Spectrum Disorder. *Qualitative health research* 2016;26(7):921-34.  
35 doi: 10.1177/1049732315616622 [published Online First: 2015/11/28]
- 36  
37 40. Wiggins LD, Rubenstein E, Daniels J, et al. A Phenotype of Childhood Autism Is Associated with  
38 Preexisting Maternal Anxiety and Depression. *Journal of abnormal child psychology* 2018 doi:  
39 10.1007/s10802-018-0469-8 [published Online First: 2018/08/22]
- 40  
41 41. Yirmiya N, Shaked M. Psychiatric Disorders in Parents of Children with Autism: A Meta-Analysis.  
42 *Journal of Child Psychology and Psychiatry* 2005;46(1):69-83. doi: 10.1111/j.1469-  
43 7610.2004.00334.x
- 44  
45 42. Goodman SH, Rouse MH, Connell AM, et al. Maternal Depression and Child Psychopathology:  
46 A Meta-Analytic Review. *Clinical Child and Family Psychology Review* 2011;14(1):1-27. doi:  
47 10.1007/s10567-010-0080-1
- 48  
49 43. Seidman I, Yirmiya N, Milshtein S, et al. The Broad Autism Phenotype Questionnaire: mothers  
50 versus fathers of children with an autism spectrum disorder. *Journal of autism and*  
51 *developmental disorders* 2012;42(5):837-46. doi: 10.1007/s10803-011-1315-9 [published  
52 Online First: 2011/06/28]
- 53  
54 44. Rubenstein E, Chawla D. Broader autism phenotype in parents of children with autism: a  
55 systematic review of percentage estimates. *Journal of child and family studies*  
56 2018;27(6):1705-20. doi: 10.1007/s10826-018-1026-3 [published Online First: 2018/05/08]
- 57  
58 45. Rubenstein E, Wiggins LD, Schieve LA, et al. Associations between parental broader autism  
59 phenotype and child autism spectrum disorder phenotype in the Study to Explore Early  
60 Development. *Autism : the international journal of research and practice*  
2018:1362361317753563. doi: 10.1177/1362361317753563 [published Online First:  
2018/01/30]
46. Ingersoll B, Hambrick DZ. The relationship between the broader autism phenotype, child severity,  
and stress and depression in parents of children with autism spectrum disorders. *Research in  
autism spectrum disorders* 2011;5(1):337-44. doi: <https://doi.org/10.1016/j.rasd.2010.04.017>



- 1
- 2
- 3
- 4 47. Whittingham K, Sheffield J, Boyd RN. Parenting acceptance and commitment therapy: a
- 5 randomised controlled trial of an innovative online course for families of children with cerebral
- 6 palsy. *BMJ Open* 2016;6(10):e012807. doi: 10.1136/bmjopen-2016-012807
- 7 48. Lowe JR, MacLean PC, Duncan AF, et al. Association of maternal interaction with emotional
- 8 regulation in 4- and 9-month infants during the Still Face Paradigm. *Infant behavior &*
- 9 *development* 2012;35(2):295-302. doi: 10.1016/j.infbeh.2011.12.002 [published Online First:
- 10 2012/01/06]
- 11 49. Harker CM, Ibanez LV, Nguyen TP, et al. The Effect of Parenting Style on Social Smiling in
- 12 Infants at High and Low Risk for ASD. *Journal of autism and developmental disorders*
- 13 2016;46(7):2399-407. doi: 10.1007/s10803-016-2772-y [published Online First: 2016/03/24]
- 14 50. Sullivan K, Stone WL, Dawson G. Potential neural mechanisms underlying the effectiveness of
- 15 early intervention for children with autism spectrum disorder. *Research in developmental*
- 16 *disabilities* 2014;35(11):2921-32. doi: 10.1016/j.ridd.2014.07.027
- 17 51. LeBlanc JJ, Fagiolini M. Autism: A “Critical Period” Disorder? *Neural Plasticity* 2011;2011(2011)
- 18 doi: 10.1155/2011/921680
- 19 52. Killmeyer S, Kaczmarek L. Parent training and joint engagement in young children with autism
- 20 spectrum disorder. *Autism & Developmental Language Impairments* 2017;2 doi:
- 21 10.1177/2396941517699214
- 22 53. Elsabbagh M, Gliga T, Pickles A, et al. The development of face orienting mechanisms in infants
- 23 at-risk for autism. *Behavioural brain research* 2013;251:147-54. doi:
- 24 10.1016/j.bbr.2012.07.030 [published Online First: 2012/08/01]
- 25 54. Elsabbagh M, Holmboe K, Gliga T, et al. Social and attention factors during infancy and the later
- 26 emergence of autism characteristics. *Progress in brain research* 2011;189:195-207. doi:
- 27 10.1016/b978-0-444-53884-0.00025-7 [published Online First: 2011/04/15]
- 28 55. Wan MW, Green J, Elsabbagh M, et al. Parent-infant interaction in infant siblings at risk of autism.
- 29 *Research in developmental disabilities* 2012;33(3):924-32. doi: 10.1016/j.ridd.2011.12.011
- 30 [published Online First: 2012/01/20]
- 31 56. Wan MW, Green J, Elsabbagh M, et al. Quality of interaction between at-risk infants and caregiver
- 32 at 12-15 months is associated with 3-year autism outcome. *Journal of child psychology and*
- 33 *psychiatry, and allied disciplines* 2013;54(7):763-71. doi: 10.1111/jcpp.12032 [published
- 34 Online First: 2012/12/12]
- 35 57. Bryson SE, Zwaigenbaum L, McDermott C, et al. The Autism Observation Scale for Infants: scale
- 36 development and reliability data. *Journal of autism and developmental disorders*
- 37 2008;38(4):731-8. doi: 10.1007/s10803-007-0440-y [published Online First: 2007/09/18]
- 38 58. Bryson S, Zwaigenbaum L. Autism Observation Scale for Infants 2014.
- 39 59. Cousijn J, Hessels RS, Van Der Stigchel S, et al. Evaluation of the Psychometric Properties of the
- 40 Gap-Overlap Task in 10-Month-Old Infants. *Infancy : the official journal of the*
- 41 *International Society on Infant Studies* 2017;22(4):571-79. doi: 10.1111/infa.12185
- 42 60. Elsabbagh M, Volein A, Holmboe K, et al. Visual orienting in the early broader autism phenotype:
- 43 disengagement and facilitation. *Journal of child psychology and psychiatry, and allied*
- 44 *disciplines* 2009;50(5):637-42. doi: 10.1111/j.1469-7610.2008.02051.x [published Online
- 45 First: 2009/03/21]
- 46 61. Brown TA, Chorpita BF, Korotitsch W, et al. Psychometric properties of the Depression Anxiety
- 47 Stress Scales (DASS) in clinical samples. *Behaviour Research and Therapy* 1997;35(1):79-89.
- 48 doi: [https://doi.org/10.1016/S0005-7967\(96\)00068-X](https://doi.org/10.1016/S0005-7967(96)00068-X)
- 49 62. Mitchell AE, Whittingham K, Steindl S, et al. Feasibility and acceptability of a brief online self-
- 50 compassion intervention for mothers of infants. *Archives of Women's Mental Health*
- 51 2018;21(5):553-61. doi: 10.1007/s00737-018-0829-y
- 52
- 53
- 54
- 55
- 56
- 57
- 58
- 59
- 60

- 1  
2  
3  
4  
5  
6  
7  
8  
9  
10  
11  
12  
13  
14  
15  
16  
17  
18  
19  
20  
21  
22  
23  
24  
25  
26  
27  
28  
29  
30  
31  
32  
33  
34  
35  
36  
37  
38  
39  
40  
41  
42  
43  
44  
45  
46  
47  
48  
49  
50  
51  
52  
53  
54  
55  
56  
57  
58  
59  
60
63. Biringen Z, Derscheid D, Vliegen N, et al. Emotional availability (EA): Theoretical background, empirical research using the EA Scales, and clinical applications. *Developmental Review* 2014;34(2):114-67. doi: <https://doi.org/10.1016/j.dr.2014.01.002>
  64. Burns TG, King TZ, Spencer KS. Mullen Scales of Early Learning: The Utility in Assessing Children Diagnosed with Autism Spectrum Disorders, Cerebral Palsy, and Epilepsy. *Applied Neuropsychology: Child* 2012;2(1):1-10. doi: 10.1080/21622965.2012.682852
  65. Sparrow SS, Cicchetti DV, Saulnier C. Vineland Adaptive Behavior Scales, third edition (Vineland—3). Bloomington, MN: Pearson 2016.
  66. Haataja L, Cowan F, Mercuri E, et al. Application of a scorable neurologic examination in healthy term infants aged 3 to 8 months. *The Journal of pediatrics* 2003;143(4):546-46. doi: 10.1067/S0022-3476(03)00393-7
  67. Haataja L, Mercuri E, Regev R, et al. Optimality score for the neurologic examination of the infant at 12 and 18 months of age. *The Journal of pediatrics* 1999;135(2):153-61. doi: 10.1016/S0022-3476(99)70016-8
  68. Morgan C, Honan I, Allsop A, et al. Psychometric Properties of Assessments of Cognition in Infants With Cerebral Palsy or Motor Impairment: A Systematic Review. *Journal of pediatric psychology* 2018 doi: 10.1093/jpepsy/jsy068
  69. Wetherby A, Allen L, Cleary J, et al. Validity and reliability of the communication and symbolic behavior scales developmental profile with very young children. *Journal of Speech, Language, and Hearing Research* 2002;45(6):1202-18. doi: 10.1044/1092-4388(2002/097)
  70. Luyster RJ, Kadlec MB, Carter A, et al. Language Assessment and Development in Toddlers with Autism Spectrum Disorders. *Journal of autism and developmental disorders* 2008;38(8):1426-38. doi: 10.1007/s10803-007-0510-1
  71. Watt N, Wetherby A, Shumway S. Prelinguistic Predictors of Language Outcome at 3 Years of Age. *Journal of Speech, Language, and Hearing Research* 2006;49(6):1224-37. doi: 10.1044/1092-4388(2006/088)
  72. Sanner N, Smith L, Wentzel-Larsen T, et al. Early identification of social-emotional problems: Applicability of the Infant-Toddler Social Emotional Assessment (ITSEA) at its lower age limit. *Infant Behavior and Development* 2016;42:69-85. doi: 10.1016/j.infbeh.2015.11.001
  73. Teng A, Bartle A, Sadeh A, et al. Infant and toddler sleep in Australia and New Zealand. *Journal of paediatrics and child health* 2012;48(3):268-73. doi: 10.1111/j.1440-1754.2011.02251.x [published Online First: 2011/11/24]
  74. Wolke D, Meyer R, Gray P. Validity of the crying pattern questionnaire in a sample of excessively crying babies. *Journal of Reproductive and Infant Psychology*, 1994;12(2):105-14.
  75. Jones EJ, Venema K, Earl R, et al. Reduced engagement with social stimuli in 6-month-old infants with later autism spectrum disorder: a longitudinal prospective study of infants at high familial risk. *Journal of neurodevelopmental disorders* 2016;8:7. doi: 10.1186/s11689-016-9139-8 [published Online First: 2016/03/17]
  76. Whittingham K, Coyne LW. Acceptance and commitment therapy : the clinician's guide for supporting parents. London: Academic Press 2019.
  77. Hurley RS, Losh M, Parlier M, et al. The broad autism phenotype questionnaire. *J Autism Dev Disord* 2007;37(9):1679-90. doi: 10.1007/s10803-006-0299-3 [published Online First: 2006/12/06]
  78. Sasson NJ, Lam KS, Childress D, et al. The broad autism phenotype questionnaire: prevalence and diagnostic classification. *Autism research : official journal of the International Society for Autism Research* 2013;6(2):134-43. doi: 10.1002/aur.1272 [published Online First: 2013/02/22]
  79. Brian J, Bryson SE, Garon N, et al. Clinical assessment of autism in high-risk 18-month-olds. *Autism : the international journal of research and practice* 2008;12(5):433-56. doi: 10.1177/1362361308094500 [published Online First: 2008/09/23]

- 1  
2  
3  
4  
5  
6  
7  
8  
9  
10  
11  
12  
13  
14  
15  
16  
17  
18  
19  
20  
21  
22  
23  
24  
25  
26  
27  
28  
29  
30  
31  
32  
33  
34  
35  
36  
37  
38  
39  
40  
41  
42  
43  
44  
45  
46  
47  
48  
49  
50  
51  
52  
53  
54  
55  
56  
57  
58  
59  
60
80. Gammer I, Bedford R, Elsabbagh M, et al. Behavioural markers for autism in infancy: scores on the Autism Observational Scale for Infants in a prospective study of at-risk siblings. *Infant behavior & development* 2015;38:107-15. doi: 10.1016/j.infbeh.2014.12.017 [published Online First: 2015/02/07]
81. Georgiades S, Szatmari P, Zwaigenbaum L, et al. A prospective study of autistic-like traits in unaffected siblings of probands with autism spectrum disorder. *JAMA psychiatry* 2013;70(1):42-8. doi: 10.1001/2013.jamapsychiatry.1 [published Online First: 2012/09/05]
82. Matsuzawa M, Shimojo S. Infants' fast saccades in the gap paradigm and development of visual attention. *Infant Behavior and Development* 1997;20(4):449-55.
83. McConnell BA, Bryson S. Visual attention and temperament: Developmental data from the first 6 months of life. *Infant Behavior and Development* 2005;28(4):537-44.
84. Zwaigenbaum L, Bryson S, Rogers T, et al. Behavioral manifestations of autism in the first year of life. *International journal of developmental neuroscience : the official journal of the International Society for Developmental Neuroscience* 2005;23(2-3):143-52. doi: 10.1016/j.ijdevneu.2004.05.001 [published Online First: 2005/03/08]
85. Bryson S, Garon N, McMullen T, et al. Impaired disengagement of attention and its relationship to emotional distress in infants at high-risk for autism spectrum disorder. *Journal of Clinical and Experimental Neuropsychology* 2018;40(5):487-501. doi: 10.1080/13803395.2017.1372368
86. Brian AJ, Roncadin C, Duku E, et al. Emerging cognitive profiles in high-risk infants with and without autism spectrum disorder. *Research in autism spectrum disorders* 2014;8(11):1557-66. doi: 10.1016/j.rasd.2014.07.021
87. Garon N, Zwaigenbaum L, Bryson S, et al. Temperament and its Association with Autism Symptoms in a High-risk Population. *Journal of abnormal child psychology* 2016;44(4):757-69. doi: 10.1007/s10802-015-0064-1 [published Online First: 2015/09/01]
88. Ozonoff S, Young GS, Brian J, et al. Diagnosis of Autism Spectrum Disorder After Age 5 in Children Evaluated Longitudinally Since Infancy. *Journal of the American Academy of Child and Adolescent Psychiatry* 2018;57(11):849-57.e2. doi: 10.1016/j.jaac.2018.06.022 [published Online First: 2018/11/06]
89. Bishop SL, Guthrie W, Coffing M, et al. Convergent Validity of the Mullen Scales of Early Learning and the Differential Ability Scales in Children with Autism Spectrum Disorders. *American Journal on Intellectual and Developmental Disabilities* 2011;116(5):331-43. doi: 10.1352/1944-7558-116.5.331
90. Swineford LB, Guthrie W, Thurm A. Convergent and Divergent Validity of the Mullen Scales of Early Learning in Young Children With and Without Autism Spectrum Disorder. *Psychological Assessment* 2015;27(4):1364-78. doi: 10.1037/pas0000116
91. Akshoomoff N. Use of the Mullen Scales of Early Learning for the Assessment of Young Children with Autism Spectrum Disorders. *Child Neuropsychology* 2006;12(4-5):269-77. doi: 10.1080/09297040500473714
92. Mullen EM. Mullen Scales of Early Learning. Circle Pines, MN: American Guidance Service. 1995.
93. Einspieler C, Prechtl HFR. Prechtl's method on the qualitative assessment of general movements in preterm, term and young infants: London : Mac Keith Press  
Cambridge, UK  
New York : Distributed by Cambridge University Press 2004.
94. Einspieler C, Sigafos J, Bolte S, et al. Highlighting the first 5 months of life: General movements in infants later diagnosed with autism spectrum disorder or Rett Syndrome. *Research in autism spectrum disorders* 2014;8(3):286-91. doi: 10.1016/j.rasd.2013.12.013 [published Online First: 2014/03/01]

- 1  
2  
3 95. Zappella M, Einspieler C, Bartl-Pokorny KD, et al. What do home videos tell us about early motor  
4 and socio-communicative behaviours in children with autistic features during the second year  
5 of life--An exploratory study. *Early human development* 2015;91(10):569-75. doi:  
6 10.1016/j.earlhumdev.2015.07.006 [published Online First: 2015/08/08]
- 7  
8 96. Haataja L, Mercuri E, Regev R, et al. Optimality score for the neurologic examination of the infant  
9 at 12 and 18 months of age. *J Pediatr* 1999;135(2 Pt 1):153-61. [published Online First:  
10 1999/08/04]
- 11  
12 97. Maitre NL, Chorna O, Romeo DM, et al. Implementation of the Hammersmith Infant Neurological  
13 Examination in a High-Risk Infant Follow-Up Program. *Pediatric Neurology* 2016;65:31-38.  
14 doi: 10.1016/j.pediatrneurol.2016.09.010
- 15  
16 98. Romeo DM, Brogna C, Sini F, et al. Early psychomotor development of low-risk preterm infants:  
17 Influence of gestational age and gender. *European Journal of Paediatric Neurology*  
18 2016;20(4):518-23. doi: 10.1016/j.ejpn.2016.04.011
- 19  
20 99. Chatziioannidis I, Kyriakidou M, Exadaktylou S, et al. Neurological outcome at 6 and 12 months  
21 corrected age in hospitalised late preterm infants -a prospective study. *European Journal of  
22 Paediatric Neurology* 2018;22(4):602-09. doi: 10.1016/j.ejpn.2018.02.013
- 23  
24 100. Briggs-Gowan M, Carter A. Infant Toddler Social & Emotional Assessment (ITSEA)  
25 Manual.2001.
- 26  
27 101. Carter A, Briggs-Gowan M. ITSEA: Infant-Toddler Social and Emotional Assessment.  
28 Massachusetts: PsychCorp 2006.
- 29  
30 102. Wetherby AM, Woods J, Allen L, et al. Early Indicators of Autism Spectrum Disorders in the  
31 Second Year of Life. *Journal of autism and developmental disorders* 2004;34(5):473-93. doi:  
32 10.1007/s10803-004-2544-y
- 33  
34 103. Eadie PA, Ukoumunne O, Skeat J, et al. Assessing early communication behaviours: structure  
35 and validity of the Communication and Symbolic Behaviour Scales Developmental Profile  
36 (CSBS-DP) in 12-month-old infants. *International Journal of Language & Communication  
37 Disorders, 2010, Vol45(5), p572-585* 2010;45(5):572-85. doi: 10.3109/13682820903277944
- 38  
39 104. Vliegen N, Luyten P, Biringen Z. A Multimethod Perspective on Emotional Availability in the  
40 Postpartum Period. *Parenting* 2009;9(3-4):228-43. doi: 10.1080/15295190902844514
- 41  
42 105. Luyten P, Mayes LC, Nijssens L, et al. The parental reflective functioning questionnaire:  
43 Development and preliminary validation. *PloS one* 2017;12(5):e0176218. doi:  
44 10.1371/journal.pone.0176218
- 45  
46 106. Gloster AT, Rhoades HM, Novy D, et al. Psychometric properties of the Depression Anxiety and  
47 Stress Scale-21 in older primary care patients. *Journal of affective disorders* 2008;110(3):248-  
48 59. doi: 10.1016/j.jad.2008.01.023 [published Online First: 03/04]
- 49  
50  
51  
52  
53  
54  
55  
56  
57  
58  
59  
60

1  
2  
3  
4  
5  
6  
7  
8  
9  
10  
11  
12  
13  
14  
15  
16  
17  
18  
19  
20  
21  
22  
23  
24  
25  
26  
27  
28  
29  
30  
31  
32  
33  
34  
35  
36  
37  
38  
39  
40  
41  
42  
43  
44  
45  
46  
47  
48  
49  
50  
51  
52  
53  
54  
55  
56  
57  
58  
59  
60

Figure 1: CONSORT flow chart of the ENACT study

For peer review only

**FIGURE 1: CONSORT flow chart of the ENACT study**

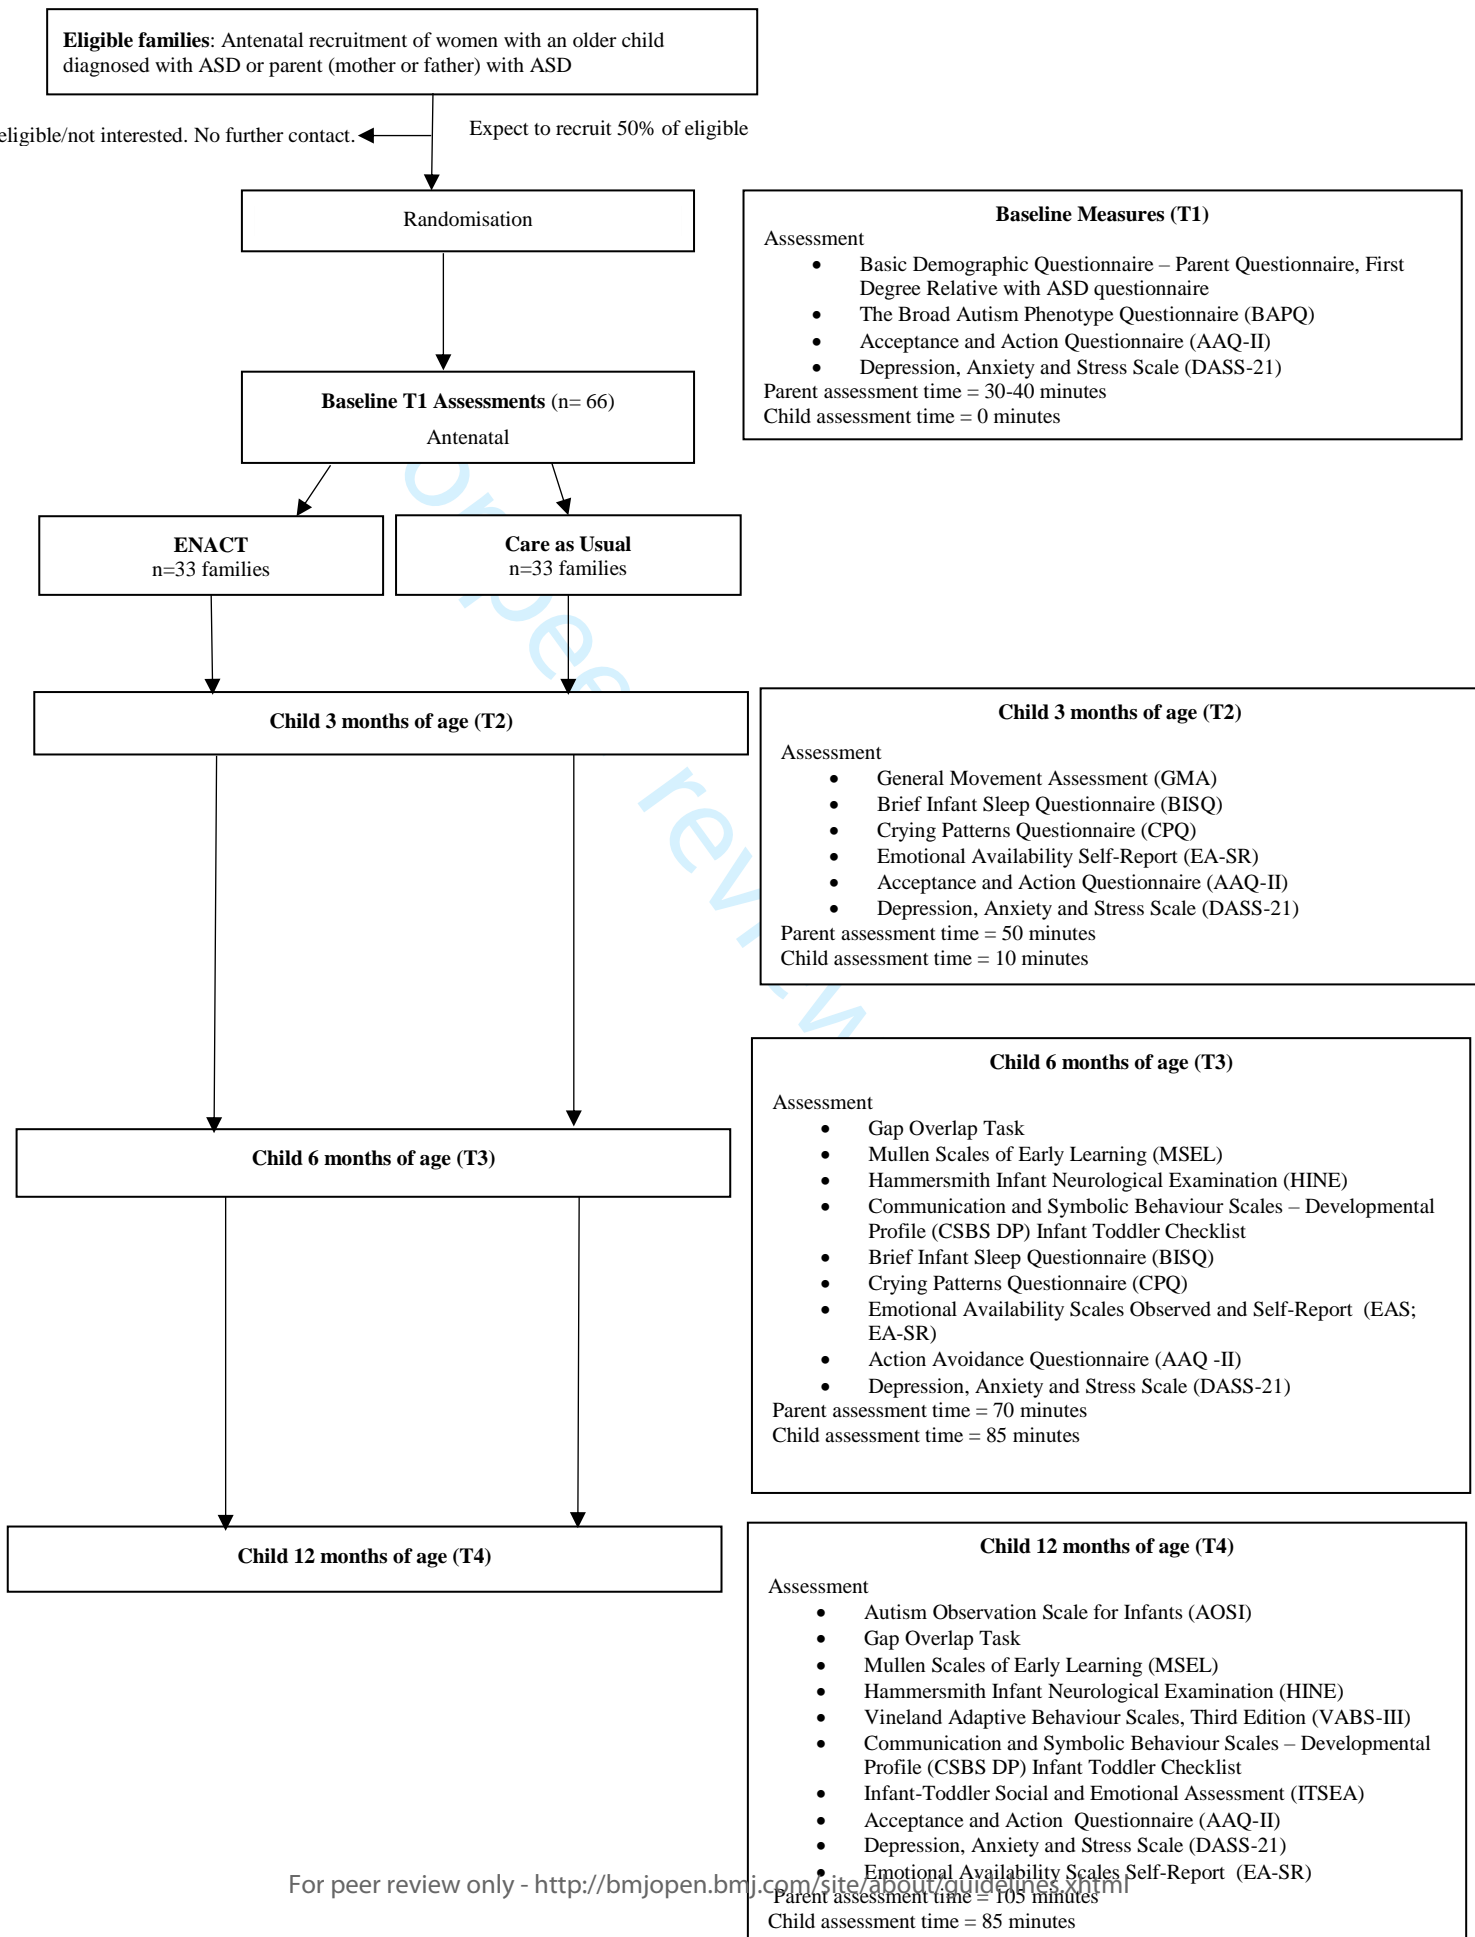

Centre for Children's Health Research (CCHR)  
Level 6, 62 Graham Street  
South Brisbane QLD 4101

Queensland Cerebral Palsy &  
Rehabilitation Research Centre  
(QCPRRC)  
Faculty of Medicine

## **PARENT/GUARDIAN INFORMATION SHEET**

**Ethics Approval:** HREC/19/QCHQ/50131, 2019000558

**Title of Project:** Environmental enrichment for infants; parenting with Acceptance and Commitment Therapy (**ENACT**)

**Chief Investigators:** Dr Koa Whittingham, Dr Andrea McGlade, Miss Kavindri Kulasinghe, Dr Amy Mitchell, Prof. Roslyn N. Boyd, Associate Professor Honey Heussler, Dr Kristelle Hudry

**Associate Investigator:** Dr Jacqui Barfoot

### **Thank you for taking the time to read this Information Sheet.**

This information statement and consent form is 7 pages long. Please make sure you have all the pages. These pages contain information about a research project that we are inviting you to take part in. **It is okay to say no if you would not like to participate in this study.** Please read this information carefully as it explains clearly and openly what participation involves. Before you decide, you can ask us any questions you have about the project. If you decide you would like to participate in this study then you need to sign and return the consent form attached.

### **What is the Research Project about?**

We have developed a new early intervention approach for infants who have an increased chance of having Autism Spectrum Disorders (ASD), targeting social interaction from the earliest months through parent-child interactions. We have integrated support for parental mental health and parenting challenges into this early intervention, and developed a means of delivering the intervention online through an e-course combined with online consultations. We are calling our early intervention approach 'Environmental Enrichment for Infants: Parenting with ACT', or '**ENACT**'. The e-course we are trialing in this research project is called '**ENACT101**'. This research project is about trialing ENACT with families of infants who have an increased chance of having of developing an Autism Spectrum Disorder (ASD). We are aiming to discover whether ENACT is effective and whether or not families find it useful.

### **Can I participate?**

You can participate in this study if you are **currently pregnant** with a **baby who has a first-degree relative (sibling or parent) with a diagnosis of an Autism Spectrum Disorder (ASD)**. This might mean that you, your baby's biological father, or your baby's sister or brother may have a diagnosis of an Autism Spectrum Disorder (ASD). As ENACT is delivered online, participation is restricted to families with **reliable internet access**. The intervention, ENACT, and the majority of assessments will be conducted via online questionnaires for your convenience. All participating families will **need to be able to travel to the Child Health Research Centre in Brisbane when their infant is 6 and 12 months of age** for their babies to have assessments in person.

## What does participating involve?

If you choose to participate in this study, you will be randomly allocated to one of two groups: ENACT or care-as-usual.

- ❖ **The ENACT group** will get immediate access to the ENACT101 e-course and online consultations with a clinician, who will answer any questions you might have and help to tailor the intervention to best meet your own individual needs and those of your baby. The ENACT intervention will include targeting your baby's social interaction from the earliest months during ordinary parent-child interactions. It also includes strategies to support your mental health and support you in coping with parenting challenges such as infant sleep. Our support for parental mental health is grounded in the psychological therapy Acceptance and Commitment Therapy (ACT). ENACT101 includes videos, text, questions and a discussion board.
- ❖ **The care-as-usual group** will receive their usual care without access to ENACT. This will allow us to determine if there are benefits to participating in ENACT.

Whether you are allocated to ENACT or to care-as-usual, you will still need to complete assessments **four times during the study: when you sign up and when your child is 3 months, 6 months, and 12 months old**. All of the assessments will include online questionnaires asking about family, feelings, wellbeing, and your relationship with your child, as well as your child's development.

At 3 months of age, you will be asked to record your baby's movements via the Baby Moves app, which we will ask you to download onto your phone. The Baby Moves app helps to record your baby's movements for the General Movements Assessment (GMA), which is a neurodevelopmental assessment tool. When your child is 6 months and 12 months old, we will ask you to bring your child for a visit to the **Centre for Children's Health Research in Brisbane** for a **comprehensive assessment of your baby's development with a developmental paediatrician. We will provide you with free parking.**

## Can I get a copy of the assessment results and find out about my baby's development?

Absolutely! We hope that this is one of the benefits of participating, whether you are in the intervention group or not. We know that finding out about your baby's development is important to you. All participating families will receive a developmental report after their baby's 12 month assessments. If earlier assessments indicate neurodevelopmental risk, particularly the general movements assessment at 3-4 months of age and the HINE at 6 months then you will be informed and assisted in finding appropriate support. All babies participating in the study will have a report provided to their parent/s after their last assessment and a copy will also go to your baby's general practitioner. If there are any findings of concern you will also be informed via the report and your general practitioner. As these assessments have been performed as part of a study, we cannot provide individual recommendations for management. The report will be able to make some general recommendations though for you to be able to discuss further with your general practitioner (or your child's paediatrician if they have one), so that you know what management options are available.

## Your involvement is genuinely appreciated.

Your active participation in refining ENACT is highly valued. We will ask you to share your thoughts and experiences with us as you work through the program.



The steps of the study participation are summarised below:

Queensland Cerebral Palsy &  
Rehabilitation Research Centre  
(QCPRRC)

- ✓ Agree to participate in the study and sign the consent form
- ✓ Complete baseline questionnaires online (30-40 minutes)
- ✓ Be randomly assigned to **ENACT** or **Care as Usual** group

### **ENACT101**

- ✓ e- course  
(6-8 hours total over 8-10 weeks)

- ✓ Early intervention for social reciprocity
- ✓ Supported by regular video conference sessions with clinician

### **Care as Usual**

- ✓ Your usual postnatal medical care

### **When your child is 3 months old**

- ✓ Complete questionnaires online  
*Parent assessment time = 50 minutes*  
*Child assessment time = 10 minutes*
- ✓ **Baby Moves app recording at 12 and 14 weeks**  
*Child assessment time = 5 minutes each recording*

### **When your child is 6 months old**

- ✓ Complete questionnaires online
- ✓ Record a **20 minute** interaction with your child
- ✓ **Complete assessments in Brisbane**  
*Parent assessment time = 70 minutes*  
*Child assessment time = 85 minutes*

### **When your child is 12 months old**

- ✓ Complete questionnaires online
  - ✓ Record a **20 minute** interaction with your child
  - ✓ **Complete assessments in Brisbane**
  - ✓ Get a comprehensive report of your child's developmental assessment
- Parent assessment time = 105 minutes*  
*Child assessment time = 85 minutes*

## **What does ENACT involve?**

ENACT101 is flexible online course, and participants will be able to move through the content at a pace that suits them. We estimate that it will take approximately 6-8 hours in total to complete the content, with most participants beginning antenatally. We aim to ensure that

participants have worked through all of the ENACT101 content by the time their infant is 8 weeks of age. ENACT101 can be accessed from any device that can connect to the internet.

The social interaction component of ENACT should be practiced regularly from when your infant is 2 weeks old, with a target of 30 minutes per day/5 days per week. However, the social interaction practice is designed to be done during ordinary, everyday activities and interactions with your baby, and shouldn't take up extra time in your day. The clinical consultations will support you in finding ways to practice ENACT in the midst of everyday life.

### **How will this research help people in the future?**

This is the first time an early intervention approach for ASD has been trialed from birth. With your help, we hope to refine ENACT. We have chosen to use an online delivery method, including the development of the e-course ENACT101, so that if ENACT is found to be effective, ENACT101 can be made accessible to families with children who have an increased chance of having Autism Spectrum Disorder across the world.

### **Are there any risks to participation?**

ENACT101 will be exploring your relationship with your newborn child as well as your thoughts, feelings and general well-being. This study contains no risks beyond everyday living.

### **Will my information be confidential?**

Yes! All information that we collect from you and your child, including your questionnaires, videoed parent-child interaction, child assessments and your feedback will be stored in a confidential manner. The information in this study will only be used in ways that will not reveal who you are. You will not be identified in any publication from this study or in any data files shared with other researchers. All information will be held in strict confidence, and will be used for statistical purposes only. Confidentiality will only be breached if a child is deemed at risk of harm or neglect. Data collected from you or your child will be de-identified, by replacing any identifying information (e.g. your name) with a participant number. Identified or de-identified research data may be made available for review by ethics review committees or other regulatory authorities for the purposes of monitoring ethical and scientific conduct of the study.

### **What if I change my mind?**

You do not have to take part in this research project. Your participation will not affect any treatment that you or your child receives. If you do agree to participate, and change your mind at a later date, you are free to withdraw from the study at any time without any negative consequence.

### **Who is involved?**

#### **Chief Investigators**

1. **Dr Koa Whittingham** is a clinical and developmental psychologist and a senior research fellow at the University of Queensland. She is experienced in working with parents of children with Autism Spectrum Disorder as well as in Acceptance and Commitment Therapy.
2. **Dr Andrea McGlade** is a developmental paediatrician and is undertaking this project as part of her PhD within the Faculty of Medicine at the University of Queensland.
3. **Miss Kavindri Kulasinghe** is a medical student within the Faculty of Medicine at the University of Queensland. She is undertaking this project as a part of her PhD.
4. **Dr Amy Mitchell** is a paediatric nurse and a research fellow at the University of Queensland with expertise in working with parents.

- 1  
2  
3  
4  
5  
6  
7  
8  
9  
10  
11  
12  
13  
14
5. **Professor Roslyn Boyd** is the Scientific Director of Queensland Cerebral Palsy and Rehabilitation Research Centre. She has clinical and scientific expertise in working with children with cerebral palsy and developmental delay and their families.
  6. **Associate Professor Honey Heussler** is a developmental and behavioural paediatrician and a researcher with the Centre for Children's Health Research. She has extensive experience working with children with developmental and behavioural problems.
  7. **Dr Kristelle Hudry** is a Senior Lecturer within the Department of Psychology and Counselling at the La Trobe University. She is experienced in working with parents of children with Autism Spectrum Disorder.

### Associate Investigators

- 15  
16  
17  
18  
19
1. **Dr Jacqui Barfoot** is an occupational therapist with clinical and research experience in parent-infant relationship focussed interventions to support infant development. She is the clinician delivering the ENACT intervention.

### Do you have any questions?

20  
21  
22

Please take the time to ask us any questions that you may have. You can contact:

23  
24  
25

Miss Kavindri Kulasinghe or Dr Andrea McGlade (Chief Investigators) on (07) 3069 7547 or email [uqenact@uq.edu.au](mailto:uqenact@uq.edu.au)

### University of Queensland Ethics Contact:

26  
27  
28  
29  
30  
31  
32  
33

This study adheres to the Guidelines of the ethical review process of The University of Queensland and the National Statement on Ethical Conduct in Human Research. Whilst you are free to discuss your participation in this study with project staff, if you would like to speak to an officer of the University not involved in the study, you may contact the Ethics Coordinators on (07) 33653924 / (07) 34431656, or email [humanethics@research.uq.edu.au](mailto:humanethics@research.uq.edu.au).

### HREC Information:

34  
35  
36  
37  
38  
39  
40  
41  
42  
43  
44  
45  
46  
47  
48  
49  
50  
51  
52  
53  
54  
55  
56  
57  
58  
59  
60

The Children's Health Queensland Hospital and Health Service Human Research Ethics Committee (HREC) has approved this study. If you have any concerns and/or complaints about the project, the way it is being conducted or your child's rights as a research participant, and would like to speak to someone independent of the project, please contact the HREC Coordinator on: 3069 7002 or email [CHQETHICS@health.qld.gov.au](mailto:CHQETHICS@health.qld.gov.au)

Centre for Children’s Health Research (CCHR)  
Level 6, 62 Graham Street  
South Brisbane QLD 4101  
Tel: (07) 3646 5542

Queensland Cerebral Palsy &  
Rehabilitation Research Centre  
(QCPRRC)  
Faculty of Medicine

**PARTICIPANT CONSENT FORM**

**Project Number:** HREC/19/QCHQ/50131, 2019000558

**Title of Project:** Environmental enrichment for infants; parenting with Acceptance and Commitment Therapy (ENACT)

**Chief Investigators:** Dr Koa Whittingham, Dr Andrea McGlade, Miss Kavindri Kulasinghe, Dr Amy Mitchell, Prof. Roslyn N. Boyd, Associate Professor Honey Heussler, Dr Kristelle Hudry

I/We,

\_\_\_\_\_ voluntarily consent to participate in the above titled Research Project explained to me by:

Mrs/Ms/Dr/Professor \_\_\_\_\_

- I/We have read the information statement for this study and I/we believe I/we understand the purpose, extent and possible effects of my involvement.
- I/We have had an opportunity to ask questions and I/we am satisfied with the answers I/we have received.
- I/We understand information collected will be stored confidentially and my/our identity will not be revealed.
- I/We understand that I/we can refuse to participate and can withdraw from this study at any time without any negative consequence. In particular, I/we understand that my/our participation will not affect my child’s access to usual medical care.
- I/We understand that the purpose of this study is to pilot an innovative, online approach to early intervention and that my/our active involvement, including critical feedback, is valued.
- I/We understand that in order to evaluate the new early intervention I/we will be asked to complete online questionnaires as well as record an ordinary parent-child interaction during the study.
- I/We consent to having videos of my/our child recorded via the Baby Moves app when my/our child is 12 and 14 weeks of age and scored by an independent assessor.
- I/We understand that I/we will receive a developmental report covering my baby’s 12 month assessments and that if neurodevelopmental risk is found at the earlier assessments particularly on the general movements assessment or the HINE I/we will be informed as soon as possible.
- I/We understand that in order to evaluate the new early intervention I/we will be asked to complete a developmental assessment at the Children’s Health Research Centre in Brisbane when my child is 6 and 12 months of age.
- I/We understand that a report of my child’s developmental assessments will be provided at the completion of the assessments and that in the event of any adverse findings I may be contacted by a member of the assessment team to notify me of these findings.

- 1  
2  
3  
4  
5  
6  
7  
8  
9  
10  
11  
12  
13  
14  
15  
16  
17  
18  
19  
20  
21  
22
- I/We consent to provide the name and contact details of my child's General Practitioner and Paediatrician (if your child has a paediatrician).
  - I/We consent for my nominated General Practitioner (and paediatrician) to be contacted and a report provided to them for further follow up with your child, including any concerns identified in the assessments performed.
  - **I/We consent to participate in this research project.**

Queensland Cerebral Palsy &  
Rehabilitation Research Centre  
(QCPRRC)  
Faculty of Medicine

11  
12  
13  
14

**My child's GP or Paediatrician:**

15  
16

**Name:** \_\_\_\_\_

17  
18

**Address:** \_\_\_\_\_

19  
20

**Phone:** \_\_\_\_\_

21  
22  
23  
24

**Signature** \_\_\_\_\_ **Date** \_\_\_\_\_

25  
26  
27  
28

I have explained this study and I believe that the participant/s understands the purpose, extent and possible effects of involvement.

29  
30  
31  
32

**Researcher's** \_\_\_\_\_ **Date** \_\_\_\_\_  
**Signature**

33  
34  
35  
36  
37  
38  
39  
40  
41  
42  
43  
44  
45  
46  
47  
48  
49  
50  
51  
52  
53  
54  
55  
56  
57  
58  
59  
60

Note: All parties signing the Consent Form must date their own signature.

# Reporting checklist for protocol of a clinical trial.

Based on the SPIRIT guidelines.

## Instructions to authors

Complete this checklist by entering the page numbers from your manuscript where readers will find each of the items listed below.

Your article may not currently address all the items on the checklist. Please modify your text to include the missing information. If you are certain that an item does not apply, please write "n/a" and provide a short explanation.

Upload your completed checklist as an extra file when you submit to a journal.

In your methods section, say that you used the SPIRIT reporting guidelines, and cite them as:

Chan A-W, Tetzlaff JM, Altman DG, Laupacis A, Gøtzsche PC, Krleža-Jerić K, Hróbjartsson A, Mann H, Dickersin K, Berlin J, Doré C, Parulekar W, Summerskill W, Groves T, Schulz K, Sox H, Rockhold FW, Rennie D, Moher D. SPIRIT 2013 Statement: Defining standard protocol items for clinical trials. *Ann Intern Med.* 2013;158(3):200-207

|                                             |                     |                                                                                                              | Page<br>Number |
|---------------------------------------------|---------------------|--------------------------------------------------------------------------------------------------------------|----------------|
| <b>Administrative information</b>           |                     |                                                                                                              |                |
| Title                                       | <a href="#">#1</a>  | Descriptive title identifying the study design, population, interventions, and, if applicable, trial acronym | Title<br>page  |
| Trial registration                          | <a href="#">#2a</a> | Trial identifier and registry name. If not yet registered, name of intended registry                         | Title<br>page  |
| Trial registration: data set                | <a href="#">#2b</a> | All items from the World Health Organization Trial Registration Data Set                                     | Title<br>page  |
| Protocol version                            | <a href="#">#3</a>  | Date and version identifier                                                                                  | N/A            |
| Funding                                     | <a href="#">#4</a>  | Sources and types of financial, material, and other support                                                  | 15             |
| Roles and responsibilities: contributorship | <a href="#">#5a</a> | Names, affiliations, and roles of protocol contributors                                                      | Title<br>page  |

|    |                               |                      |                                                                                                |      |
|----|-------------------------------|----------------------|------------------------------------------------------------------------------------------------|------|
| 1  | Roles and                     | <a href="#">#5b</a>  | Name and contact information for the trial sponsor                                             | N/A  |
| 2  | responsibilities: sponsor     |                      |                                                                                                |      |
| 3  | contact information           |                      |                                                                                                |      |
| 4  |                               |                      |                                                                                                |      |
| 5  |                               |                      |                                                                                                |      |
| 6  | Roles and                     | <a href="#">#5c</a>  | Role of study sponsor and funders, if any, in study design; collection, management,            | N/A  |
| 7  | responsibilities: sponsor     |                      | analysis, and interpretation of data; writing of the report; and the decision to submit the    |      |
| 8  | and funder                    |                      | report for publication, including whether they will have ultimate authority over any of        |      |
| 9  |                               |                      | these activities                                                                               |      |
| 10 |                               |                      |                                                                                                |      |
| 11 |                               |                      |                                                                                                |      |
| 12 |                               |                      |                                                                                                |      |
| 13 | Roles and                     | <a href="#">#5d</a>  | Composition, roles, and responsibilities of the coordinating centre, steering committee,       | 15   |
| 14 | responsibilities:             |                      | endpoint adjudication committee, data management team, and other individuals or                |      |
| 15 | committees                    |                      | groups overseeing the trial, if applicable (see Item 21a for data monitoring committee)        |      |
| 16 |                               |                      |                                                                                                |      |
| 17 |                               |                      |                                                                                                |      |
| 18 |                               |                      |                                                                                                |      |
| 19 | <b>Introduction</b>           |                      |                                                                                                |      |
| 20 |                               |                      |                                                                                                |      |
| 21 | Background and                | <a href="#">#6a</a>  | Description of research question and justification for undertaking the trial, including        | 5-6  |
| 22 | rationale                     |                      | summary of relevant studies (published and unpublished) examining benefits and harms           |      |
| 23 |                               |                      | for each intervention                                                                          |      |
| 24 |                               |                      |                                                                                                |      |
| 25 |                               |                      |                                                                                                |      |
| 26 | Background and                | <a href="#">#6b</a>  | Explanation for choice of comparators                                                          | 6    |
| 27 | rationale: choice of          |                      |                                                                                                |      |
| 28 | comparators                   |                      |                                                                                                |      |
| 29 |                               |                      |                                                                                                |      |
| 30 |                               |                      |                                                                                                |      |
| 31 |                               |                      |                                                                                                |      |
| 32 | Objectives                    | <a href="#">#7</a>   | Specific objectives or hypotheses                                                              | 6-7  |
| 33 |                               |                      |                                                                                                |      |
| 34 | Trial design                  | <a href="#">#8</a>   | Description of trial design including type of trial (eg, parallel group, crossover, factorial, | 6-7  |
| 35 |                               |                      | single group), allocation ratio, and framework (eg, superiority, equivalence, non-             |      |
| 36 |                               |                      | inferiority, exploratory)                                                                      |      |
| 37 |                               |                      |                                                                                                |      |
| 38 |                               |                      |                                                                                                |      |
| 39 |                               |                      |                                                                                                |      |
| 40 | <b>Methods: Participants,</b> |                      |                                                                                                |      |
| 41 | <b>interventions, and</b>     |                      |                                                                                                |      |
| 42 | <b>outcomes</b>               |                      |                                                                                                |      |
| 43 |                               |                      |                                                                                                |      |
| 44 |                               |                      |                                                                                                |      |
| 45 | Study setting                 | <a href="#">#9</a>   | Description of study settings (eg, community clinic, academic hospital) and list of            | 8-9  |
| 46 |                               |                      | countries where data will be collected. Reference to where list of study sites can be          |      |
| 47 |                               |                      | obtained                                                                                       |      |
| 48 |                               |                      |                                                                                                |      |
| 49 |                               |                      |                                                                                                |      |
| 50 |                               |                      |                                                                                                |      |
| 51 | Eligibility criteria          | <a href="#">#10</a>  | Inclusion and exclusion criteria for participants. If applicable, eligibility criteria for     | 8    |
| 52 |                               |                      | study centres and individuals who will perform the interventions (eg, surgeons,                |      |
| 53 |                               |                      | psychotherapists)                                                                              |      |
| 54 |                               |                      |                                                                                                |      |
| 55 |                               |                      |                                                                                                |      |
| 56 | Interventions:                | <a href="#">#11a</a> | Interventions for each group with sufficient detail to allow replication, including how        | 9-10 |
| 57 | description                   |                      | and when they will be administered                                                             |      |
| 58 |                               |                      |                                                                                                |      |
| 59 |                               |                      |                                                                                                |      |
| 60 |                               |                      |                                                                                                |      |

|    |                              |                      |                                                                                             |          |
|----|------------------------------|----------------------|---------------------------------------------------------------------------------------------|----------|
| 1  | Interventions:               | <a href="#">#11b</a> | Criteria for discontinuing or modifying allocated interventions for a given trial           | N/A      |
| 2  | modifications                |                      | participant (eg, drug dose change in response to harms, participant request, or improving   |          |
| 3  |                              |                      | / worsening disease)                                                                        |          |
| 4  |                              |                      |                                                                                             |          |
| 5  |                              |                      |                                                                                             |          |
| 6  | Interventions: adherence     | <a href="#">#11c</a> | Strategies to improve adherence to intervention protocols, and any procedures for           | 10       |
| 7  |                              |                      | monitoring adherence (eg, drug tablet return; laboratory tests)                             |          |
| 8  |                              |                      |                                                                                             |          |
| 9  |                              |                      |                                                                                             |          |
| 10 | Interventions:               | <a href="#">#11d</a> | Relevant concomitant care and interventions that are permitted or prohibited during the     | 9        |
| 11 | concomitant care             |                      | trial                                                                                       |          |
| 12 |                              |                      |                                                                                             |          |
| 13 |                              |                      |                                                                                             |          |
| 14 | Outcomes                     | <a href="#">#12</a>  | Primary, secondary, and other outcomes, including the specific measurement variable         | 11-14    |
| 15 |                              |                      | (eg, systolic blood pressure), analysis metric (eg, change from baseline, final value, time |          |
| 16 |                              |                      | to event), method of aggregation (eg, median, proportion), and time point for each          |          |
| 17 |                              |                      | outcome. Explanation of the clinical relevance of chosen efficacy and harm outcomes is      |          |
| 18 |                              |                      | strongly recommended                                                                        |          |
| 19 |                              |                      |                                                                                             |          |
| 20 |                              |                      |                                                                                             |          |
| 21 |                              |                      |                                                                                             |          |
| 22 | Participant timeline         | <a href="#">#13</a>  | Time schedule of enrolment, interventions (including any run-ins and washouts),             | 17,      |
| 23 |                              |                      | assessments, and visits for participants. A schematic diagram is highly recommended         | figure 1 |
| 24 |                              |                      | (see Figure)                                                                                |          |
| 25 |                              |                      |                                                                                             |          |
| 26 |                              |                      |                                                                                             |          |
| 27 |                              |                      |                                                                                             |          |
| 28 | Sample size                  | <a href="#">#14</a>  | Estimated number of participants needed to achieve study objectives and how it was          | 8        |
| 29 |                              |                      | determined, including clinical and statistical assumptions supporting any sample size       |          |
| 30 |                              |                      | calculations                                                                                |          |
| 31 |                              |                      |                                                                                             |          |
| 32 |                              |                      |                                                                                             |          |
| 33 | Recruitment                  | <a href="#">#15</a>  | Strategies for achieving adequate participant enrolment to reach target sample size         | 8        |
| 34 |                              |                      |                                                                                             |          |
| 35 |                              |                      |                                                                                             |          |
| 36 | <b>Methods: Assignment</b>   |                      |                                                                                             |          |
| 37 | <b>of interventions (for</b> |                      |                                                                                             |          |
| 38 | <b>controlled trials)</b>    |                      |                                                                                             |          |
| 39 |                              |                      |                                                                                             |          |
| 40 |                              |                      |                                                                                             |          |
| 41 | Allocation: sequence         | <a href="#">#16a</a> | Method of generating the allocation sequence (eg, computer-generated random                 | 10-11    |
| 42 | generation                   |                      | numbers), and list of any factors for stratification. To reduce predictability of a random  |          |
| 43 |                              |                      | sequence, details of any planned restriction (eg, blocking) should be provided in a         |          |
| 44 |                              |                      | separate document that is unavailable to those who enrol participants or assign             |          |
| 45 |                              |                      | interventions                                                                               |          |
| 46 |                              |                      |                                                                                             |          |
| 47 |                              |                      |                                                                                             |          |
| 48 |                              |                      |                                                                                             |          |
| 49 |                              |                      |                                                                                             |          |
| 50 |                              | <a href="#">#16b</a> | Mechanism of implementing the allocation sequence (eg, central telephone; sequentially      | 10-11    |
| 51 |                              |                      | numbered, opaque, sealed envelopes), describing any steps to conceal the sequence until     |          |
| 52 |                              |                      | interventions are assigned                                                                  |          |
| 53 |                              |                      |                                                                                             |          |
| 54 |                              |                      |                                                                                             |          |
| 55 | Allocation:                  | <a href="#">#16c</a> | Who will generate the allocation sequence, who will enrol participants, and who will        | 10-11    |
| 56 | implementation               |                      | assign participants to interventions                                                        |          |
| 57 |                              |                      |                                                                                             |          |
| 58 |                              |                      |                                                                                             |          |
| 59 |                              |                      |                                                                                             |          |
| 60 |                              |                      |                                                                                             |          |



|    |                            |                      |                                                                                                                                                                                                                                                                                                                                                                                                              |       |
|----|----------------------------|----------------------|--------------------------------------------------------------------------------------------------------------------------------------------------------------------------------------------------------------------------------------------------------------------------------------------------------------------------------------------------------------------------------------------------------------|-------|
| 1  | Blinding (masking)         | <a href="#">#17a</a> | Who will be blinded after assignment to interventions (eg, trial participants, care providers, outcome assessors, data analysts), and how                                                                                                                                                                                                                                                                    | N/A   |
| 2  |                            |                      |                                                                                                                                                                                                                                                                                                                                                                                                              |       |
| 3  |                            |                      |                                                                                                                                                                                                                                                                                                                                                                                                              |       |
| 4  | Blinding (masking):        | <a href="#">#17b</a> | If blinded, circumstances under which unblinding is permissible, and procedure for                                                                                                                                                                                                                                                                                                                           | N/A   |
| 5  | emergency unblinding       |                      | revealing a participant's allocated intervention during the trial                                                                                                                                                                                                                                                                                                                                            |       |
| 6  |                            |                      |                                                                                                                                                                                                                                                                                                                                                                                                              |       |
| 7  |                            |                      |                                                                                                                                                                                                                                                                                                                                                                                                              |       |
| 8  | <b>Methods: Data</b>       |                      |                                                                                                                                                                                                                                                                                                                                                                                                              |       |
| 9  | <b>collection,</b>         |                      |                                                                                                                                                                                                                                                                                                                                                                                                              |       |
| 10 | <b>management, and</b>     |                      |                                                                                                                                                                                                                                                                                                                                                                                                              |       |
| 11 | <b>analysis</b>            |                      |                                                                                                                                                                                                                                                                                                                                                                                                              |       |
| 12 |                            |                      |                                                                                                                                                                                                                                                                                                                                                                                                              |       |
| 13 |                            |                      |                                                                                                                                                                                                                                                                                                                                                                                                              |       |
| 14 |                            |                      |                                                                                                                                                                                                                                                                                                                                                                                                              |       |
| 15 | Data collection plan       | <a href="#">#18a</a> | Plans for assessment and collection of outcome, baseline, and other trial data, including any related processes to promote data quality (eg, duplicate measurements, training of assessors) and a description of study instruments (eg, questionnaires, laboratory tests) along with their reliability and validity, if known. Reference to where data collection forms can be found, if not in the protocol | 11-14 |
| 16 |                            |                      |                                                                                                                                                                                                                                                                                                                                                                                                              |       |
| 17 |                            |                      |                                                                                                                                                                                                                                                                                                                                                                                                              |       |
| 18 |                            |                      |                                                                                                                                                                                                                                                                                                                                                                                                              |       |
| 19 |                            |                      |                                                                                                                                                                                                                                                                                                                                                                                                              |       |
| 20 |                            |                      |                                                                                                                                                                                                                                                                                                                                                                                                              |       |
| 21 |                            |                      |                                                                                                                                                                                                                                                                                                                                                                                                              |       |
| 22 |                            |                      |                                                                                                                                                                                                                                                                                                                                                                                                              |       |
| 23 |                            |                      |                                                                                                                                                                                                                                                                                                                                                                                                              |       |
| 24 | Data collection plan:      | <a href="#">#18b</a> | Plans to promote participant retention and complete follow-up, including list of any                                                                                                                                                                                                                                                                                                                         | 14    |
| 25 | retention                  |                      | outcome data to be collected for participants who discontinue or deviate from intervention protocols                                                                                                                                                                                                                                                                                                         |       |
| 26 |                            |                      |                                                                                                                                                                                                                                                                                                                                                                                                              |       |
| 27 |                            |                      |                                                                                                                                                                                                                                                                                                                                                                                                              |       |
| 28 |                            |                      |                                                                                                                                                                                                                                                                                                                                                                                                              |       |
| 29 | Data management            | <a href="#">#19</a>  | Plans for data entry, coding, security, and storage, including any related processes to promote data quality (eg, double data entry; range checks for data values). Reference to where details of data management procedures can be found, if not in the protocol                                                                                                                                            | 14    |
| 30 |                            |                      |                                                                                                                                                                                                                                                                                                                                                                                                              |       |
| 31 |                            |                      |                                                                                                                                                                                                                                                                                                                                                                                                              |       |
| 32 |                            |                      |                                                                                                                                                                                                                                                                                                                                                                                                              |       |
| 33 |                            |                      |                                                                                                                                                                                                                                                                                                                                                                                                              |       |
| 34 |                            |                      |                                                                                                                                                                                                                                                                                                                                                                                                              |       |
| 35 | Statistics: outcomes       | <a href="#">#20a</a> | Statistical methods for analysing primary and secondary outcomes. Reference to where other details of the statistical analysis plan can be found, if not in the protocol                                                                                                                                                                                                                                     | 15    |
| 36 |                            |                      |                                                                                                                                                                                                                                                                                                                                                                                                              |       |
| 37 |                            |                      |                                                                                                                                                                                                                                                                                                                                                                                                              |       |
| 38 |                            |                      |                                                                                                                                                                                                                                                                                                                                                                                                              |       |
| 39 | Statistics: additional     | <a href="#">#20b</a> | Methods for any additional analyses (eg, subgroup and adjusted analyses)                                                                                                                                                                                                                                                                                                                                     | N/A   |
| 40 | analyses                   |                      |                                                                                                                                                                                                                                                                                                                                                                                                              |       |
| 41 |                            |                      |                                                                                                                                                                                                                                                                                                                                                                                                              |       |
| 42 |                            |                      |                                                                                                                                                                                                                                                                                                                                                                                                              |       |
| 43 | Statistics: analysis       | <a href="#">#20c</a> | Definition of analysis population relating to protocol non-adherence (eg, as randomised analysis), and any statistical methods to handle missing data (eg, multiple imputation)                                                                                                                                                                                                                              | N/A   |
| 44 | population and missing     |                      |                                                                                                                                                                                                                                                                                                                                                                                                              |       |
| 45 | data                       |                      |                                                                                                                                                                                                                                                                                                                                                                                                              |       |
| 46 |                            |                      |                                                                                                                                                                                                                                                                                                                                                                                                              |       |
| 47 |                            |                      |                                                                                                                                                                                                                                                                                                                                                                                                              |       |
| 48 | <b>Methods: Monitoring</b> |                      |                                                                                                                                                                                                                                                                                                                                                                                                              |       |
| 49 |                            |                      |                                                                                                                                                                                                                                                                                                                                                                                                              |       |
| 50 | Data monitoring: formal    | <a href="#">#21a</a> | Composition of data monitoring committee (DMC); summary of its role and reporting structure; statement of whether it is independent from the sponsor and competing interests; and reference to where further details about its charter can be found, if not in the protocol. Alternatively, an explanation of why a DMC is not needed                                                                        | 15    |
| 51 | committee                  |                      |                                                                                                                                                                                                                                                                                                                                                                                                              |       |
| 52 |                            |                      |                                                                                                                                                                                                                                                                                                                                                                                                              |       |
| 53 |                            |                      |                                                                                                                                                                                                                                                                                                                                                                                                              |       |
| 54 |                            |                      |                                                                                                                                                                                                                                                                                                                                                                                                              |       |
| 55 |                            |                      |                                                                                                                                                                                                                                                                                                                                                                                                              |       |
| 56 |                            |                      |                                                                                                                                                                                                                                                                                                                                                                                                              |       |
| 57 |                            |                      |                                                                                                                                                                                                                                                                                                                                                                                                              |       |
| 58 |                            |                      |                                                                                                                                                                                                                                                                                                                                                                                                              |       |
| 59 |                            |                      |                                                                                                                                                                                                                                                                                                                                                                                                              |       |
| 60 |                            |                      |                                                                                                                                                                                                                                                                                                                                                                                                              |       |

|    |                          |                      |                                                                                             |       |
|----|--------------------------|----------------------|---------------------------------------------------------------------------------------------|-------|
| 1  | Data monitoring: interim | <a href="#">#21b</a> | Description of any interim analyses and stopping guidelines, including who will have        | N/A   |
| 2  | analysis                 |                      | access to these interim results and make the final decision to terminate the trial          |       |
| 3  |                          |                      |                                                                                             |       |
| 4  |                          |                      |                                                                                             |       |
| 5  | Harms                    | <a href="#">#22</a>  | Plans for collecting, assessing, reporting, and managing solicited and spontaneously        | 15    |
| 6  |                          |                      | reported adverse events and other unintended effects of trial interventions or trial        |       |
| 7  |                          |                      | conduct                                                                                     |       |
| 8  |                          |                      |                                                                                             |       |
| 9  |                          |                      |                                                                                             |       |
| 10 | Auditing                 | <a href="#">#23</a>  | Frequency and procedures for auditing trial conduct, if any, and whether the process will   | N/A   |
| 11 |                          |                      | be independent from investigators and the sponsor                                           |       |
| 12 |                          |                      |                                                                                             |       |
| 13 |                          |                      |                                                                                             |       |
| 14 | <b>Ethics and</b>        |                      |                                                                                             |       |
| 15 | <b>dissemination</b>     |                      |                                                                                             |       |
| 16 |                          |                      |                                                                                             |       |
| 17 |                          |                      |                                                                                             |       |
| 18 | Research ethics approval | <a href="#">#24</a>  | Plans for seeking research ethics committee / institutional review board (REC / IRB)        | 15    |
| 19 |                          |                      | approval                                                                                    |       |
| 20 |                          |                      |                                                                                             |       |
| 21 |                          |                      |                                                                                             |       |
| 22 | Protocol amendments      | <a href="#">#25</a>  | Plans for communicating important protocol modifications (eg, changes to eligibility        | N/A   |
| 23 |                          |                      | criteria, outcomes, analyses) to relevant parties (eg, investigators, REC / IRBs, trial     |       |
| 24 |                          |                      | participants, trial registries, journals, regulators)                                       |       |
| 25 |                          |                      |                                                                                             |       |
| 26 |                          |                      |                                                                                             |       |
| 27 | Consent or assent        | <a href="#">#26a</a> | Who will obtain informed consent or assent from potential trial participants or             | 10-11 |
| 28 |                          |                      | authorised surrogates, and how (see Item 32)                                                |       |
| 29 |                          |                      |                                                                                             |       |
| 30 |                          |                      |                                                                                             |       |
| 31 | Consent or assent:       | <a href="#">#26b</a> | Additional consent provisions for collection and use of participant data and biological     | N/A   |
| 32 | ancillary studies        |                      | specimens in ancillary studies, if applicable                                               |       |
| 33 |                          |                      |                                                                                             |       |
| 34 |                          |                      |                                                                                             |       |
| 35 | Confidentiality          | <a href="#">#27</a>  | How personal information about potential and enrolled participants will be collected,       | 15    |
| 36 |                          |                      | shared, and maintained in order to protect confidentiality before, during, and after the    |       |
| 37 |                          |                      | trial                                                                                       |       |
| 38 |                          |                      |                                                                                             |       |
| 39 |                          |                      |                                                                                             |       |
| 40 |                          |                      |                                                                                             |       |
| 41 | Declaration of interests | <a href="#">#28</a>  | Financial and other competing interests for principal investigators for the overall trial   | N/A   |
| 42 |                          |                      | and each study site                                                                         |       |
| 43 |                          |                      |                                                                                             |       |
| 44 |                          |                      |                                                                                             |       |
| 45 | Data access              | <a href="#">#29</a>  | Statement of who will have access to the final trial dataset, and disclosure of contractual | 14    |
| 46 |                          |                      | agreements that limit such access for investigators                                         |       |
| 47 |                          |                      |                                                                                             |       |
| 48 |                          |                      |                                                                                             |       |
| 49 | Ancillary and post trial | <a href="#">#30</a>  | Provisions, if any, for ancillary and post-trial care, and for compensation to those who    | N/A   |
| 50 | care                     |                      | suffer harm from trial participation                                                        |       |
| 51 |                          |                      |                                                                                             |       |
| 52 | Dissemination policy:    | <a href="#">#31a</a> | Plans for investigators and sponsor to communicate trial results to participants,           | 15    |
| 53 | trial results            |                      | healthcare professionals, the public, and other relevant groups (eg, via publication,       |       |
| 54 |                          |                      | reporting in results databases, or other data sharing arrangements), including any          |       |
| 55 |                          |                      | publication restrictions                                                                    |       |
| 56 |                          |                      |                                                                                             |       |
| 57 |                          |                      |                                                                                             |       |
| 58 |                          |                      |                                                                                             |       |
| 59 |                          |                      |                                                                                             |       |
| 60 |                          |                      |                                                                                             |       |

|   |                       |                      |                                                                                                |     |
|---|-----------------------|----------------------|------------------------------------------------------------------------------------------------|-----|
| 1 | Dissemination policy: | <a href="#">#31b</a> | Authorship eligibility guidelines and any intended use of professional writers                 | N/A |
| 2 | authorship            |                      |                                                                                                |     |
| 3 |                       |                      |                                                                                                |     |
| 4 | Dissemination policy: | <a href="#">#31c</a> | Plans, if any, for granting public access to the full protocol, participant-level dataset, and | N/A |
| 5 | reproducible research |                      | statistical code                                                                               |     |
| 6 |                       |                      |                                                                                                |     |
| 7 |                       |                      |                                                                                                |     |

8  
9 **Appendices**

|    |                      |                     |                                                                                                |     |
|----|----------------------|---------------------|------------------------------------------------------------------------------------------------|-----|
| 10 | Informed consent     | <a href="#">#32</a> | Model consent form and other related documentation given to participants and                   | N/A |
| 11 | materials            |                     | authorised surrogates                                                                          |     |
| 12 |                      |                     |                                                                                                |     |
| 13 | Biological specimens | <a href="#">#33</a> | Plans for collection, laboratory evaluation, and storage of biological specimens for           | N/A |
| 14 |                      |                     | genetic or molecular analysis in the current trial and for future use in ancillary studies, if |     |
| 15 |                      |                     | applicable                                                                                     |     |
| 16 |                      |                     |                                                                                                |     |
| 17 |                      |                     |                                                                                                |     |
| 18 |                      |                     |                                                                                                |     |
| 19 |                      |                     |                                                                                                |     |

20 None The SPIRIT checklist is distributed under the terms of the Creative Commons Attribution License CC-BY-ND 3.0. This checklist  
21 can be completed online using <https://www.goodreports.org/>, a tool made by the [EQUATOR Network](#) in collaboration with [Penelope.ai](#)  
22  
23  
24  
25  
26  
27  
28  
29  
30  
31  
32  
33  
34  
35  
36  
37  
38  
39  
40  
41  
42  
43  
44  
45  
46  
47  
48  
49  
50  
51  
52  
53  
54  
55  
56  
57  
58  
59  
60

# BMJ Open

## ENACT (ENvironmental enrichment for infants; parenting with Acceptance and Commitment Therapy): A randomised controlled trial of an innovative intervention for infants at risk of Autism Spectrum Disorder

|                                 |                                                                                                                                                                                                                                                                                                                                                                                                                                                                                                                                                                                                                                                                                                                                                                                                                                |
|---------------------------------|--------------------------------------------------------------------------------------------------------------------------------------------------------------------------------------------------------------------------------------------------------------------------------------------------------------------------------------------------------------------------------------------------------------------------------------------------------------------------------------------------------------------------------------------------------------------------------------------------------------------------------------------------------------------------------------------------------------------------------------------------------------------------------------------------------------------------------|
| Journal:                        | <i>BMJ Open</i>                                                                                                                                                                                                                                                                                                                                                                                                                                                                                                                                                                                                                                                                                                                                                                                                                |
| Manuscript ID                   | bmjopen-2019-034315.R2                                                                                                                                                                                                                                                                                                                                                                                                                                                                                                                                                                                                                                                                                                                                                                                                         |
| Article Type:                   | Protocol                                                                                                                                                                                                                                                                                                                                                                                                                                                                                                                                                                                                                                                                                                                                                                                                                       |
| Date Submitted by the Author:   | 04-May-2020                                                                                                                                                                                                                                                                                                                                                                                                                                                                                                                                                                                                                                                                                                                                                                                                                    |
| Complete List of Authors:       | Whittingham, Koa; The University of Queensland, Queensland Cerebral palsy Research centre; The University of Queensland<br>McGlade, Andrea; The University of Queensland, Queensland Cerebral Palsy and Rehabilitation Research Centre, UQ Child Health Research Centre, Faculty of Medicine<br>Kulasinghe, Kavindri; The University of Queensland, Queensland Cerebral Palsy and Rehabilitation Research Centre, UQ Child Health Research Centre, Faculty of Medicine<br>Mitchell , AE ; University of Queensland, Parenting and Family Support Centre, School of Psychology<br>Heussler, Honey; Mater Medical Research Institute<br>Boyd, Roslyn; The University of Queensland, Queensland Cerebral Palsy and Rehabilitation Research Centre; The University of Queensland, Queensland Children's Medical Research Institute |
| <b>Primary Subject Heading</b>: | Paediatrics                                                                                                                                                                                                                                                                                                                                                                                                                                                                                                                                                                                                                                                                                                                                                                                                                    |
| Secondary Subject Heading:      | Paediatrics, Public health                                                                                                                                                                                                                                                                                                                                                                                                                                                                                                                                                                                                                                                                                                                                                                                                     |
| Keywords:                       | Autism Spectrum Disorder, early intervention, maternal mental health, parent-infant interaction, infant development                                                                                                                                                                                                                                                                                                                                                                                                                                                                                                                                                                                                                                                                                                            |
|                                 |                                                                                                                                                                                                                                                                                                                                                                                                                                                                                                                                                                                                                                                                                                                                                                                                                                |

SCHOLARONE™  
Manuscripts



I, the Submitting Author has the right to grant and does grant on behalf of all authors of the Work (as defined in the below author licence), an exclusive licence and/or a non-exclusive licence for contributions from authors who are: i) UK Crown employees; ii) where BMJ has agreed a CC-BY licence shall apply, and/or iii) in accordance with the terms applicable for US Federal Government officers or employees acting as part of their official duties; on a worldwide, perpetual, irrevocable, royalty-free basis to BMJ Publishing Group Ltd ("BMJ") its licensees and where the relevant Journal is co-owned by BMJ to the co-owners of the Journal, to publish the Work in this journal and any other BMJ products and to exploit all rights, as set out in our [licence](#).

The Submitting Author accepts and understands that any supply made under these terms is made by BMJ to the Submitting Author unless you are acting as an employee on behalf of your employer or a postgraduate student of an affiliated institution which is paying any applicable article publishing charge ("APC") for Open Access articles. Where the Submitting Author wishes to make the Work available on an Open Access basis (and intends to pay the relevant APC), the terms of reuse of such Open Access shall be governed by a Creative Commons licence – details of these licences and which [Creative Commons](#) licence will apply to this Work are set out in our licence referred to above.

Other than as permitted in any relevant BMJ Author's Self Archiving Policies, I confirm this Work has not been accepted for publication elsewhere, is not being considered for publication elsewhere and does not duplicate material already published. I confirm all authors consent to publication of this Work and authorise the granting of this licence.

1  
2  
3 **ENACT (ENvironmental enrichment for infants; parenting with Acceptance and Commitment**  
4 **Therapy): A randomised controlled trial of an innovative intervention for infants at risk of**  
5 **Autism Spectrum Disorder**  
6  
7  
8  
9

10 Koa Whittingham<sup>1</sup>, Andrea McGlade<sup>1</sup>, Kavindri Kulasinghe<sup>1</sup>, Amy E. Mitchell<sup>2</sup>, Honey Heussler<sup>3,4</sup>,  
11 & Roslyn N. Boyd<sup>1</sup>

12 <sup>1</sup>Queensland Cerebral Palsy and Rehabilitation Research Centre, Faculty of Medicine, UQ Child  
13 Health Research Centre  
14

15 The University of Queensland, Brisbane, Australia;  
16

17 <sup>2</sup>Parenting and Family Support Centre, School of Psychology, The University of Queensland, Brisbane,  
18 Australia.  
19

20 <sup>3</sup> UQ Child Health Research Centre, Faculty of Medicine, The University of Queensland, Brisbane,  
21 Australia  
22

23 <sup>4</sup>Centre for Clinical Trials in Rare Neurodevelopmental Disorders, Child Development Program, Child  
24 Youth and Community Health Services, Children's Health Queensland, Brisbane, Australia.  
25  
26  
27  
28  
29

30 **Running head:** ENACT (ENvironmental enrichment for infants; parenting with Acceptance and  
31 Commitment Therapy)  
32  
33  
34  
35

36 **Registered with:** Australian New Zealand Clinical Trials Registry (ACTRN12618002046280)  
37 registered 21/12/2018; Universal Trial Number (U1111-1224-6536)  
38  
39  
40

41 **Acknowledgements:**

42 This work was supported by two University of Queensland Graduate School Scholarships (AM and  
43 KK), a Children's Hospital Foundation Early Career Fellowship (AEM; award ref. no. 50223), an  
44 NHMRC Research Fellowship (RNB; 1105038) and a philanthropic donation.  
45  
46  
47  
48  
49

50 **Declaration of Interest:**

51 None  
52  
53  
54

55 **Address for Correspondence:**

56 Dr Koa Whittingham  
57

58 Queensland Cerebral Palsy and Rehabilitation Research Centre, The University of Queensland  
59 Level 6, Centre for Children's Health Research  
60

1  
2  
3 62 Graham Street

4  
5 South Brisbane 4101

6  
7 Email: [koawhittingham@uq.edu.au](mailto:koawhittingham@uq.edu.au)  
8  
9

10 **Author contributions** All authors contributed to the conception and design of this study. KW and  
11 AM designed the ENACT intervention. KK, KW and AEM contributed to the design in terms of  
12 parental mental health and parent-child relationship assessment. AM, KW, HH and RNB contributed  
13 to the design in terms of motor, cognitive and autistic symptomatology assessment. All authors  
14 contributed to drafting and critical revision of the manuscript. All authors approved the final version  
15 of the manuscript to be submitted for publication.  
16  
17  
18  
19  
20  
21  
22  
23  
24  
25  
26  
27  
28  
29  
30  
31  
32  
33  
34  
35  
36  
37  
38  
39  
40  
41  
42  
43  
44  
45  
46  
47  
48  
49  
50  
51  
52  
53  
54  
55  
56  
57  
58  
59  
60

## Abstract

**Introduction:** Autism spectrum disorder (ASD) is a heterogeneous neurodevelopmental condition with impacts on behaviour, cognition, communication, social interaction and family mental health. This paper reports the protocol of a randomised controlled trial (RCT) of a very early intervention ENACT (ENvironmental enrichment for infants; parenting with Acceptance and Commitment Therapy) for families of infants at risk of ASD.

**Methods and analysis:** We aim to recruit 66 mothers of infants at risk of ASD (i.e., infants with a sibling or parent diagnosed with ASD) to this randomised controlled trial (RCT). Families will be randomly assigned to care-as-usual or ENACT. ENACT is a very early intervention, leveraging parent-child interactions to improve early social reciprocity, while supporting parental mental health and the parent-child relationship through Acceptance and Commitment Therapy (ACT). Intervention content is delivered online (approximately 8 hours) and supported by consultations (7+) with a clinician. Parents will perform the social reciprocity intervention with their child (30 minutes per day). Assessments at four time points (baseline; 3 months, 6 months and 12 months corrected age) will assess parent-infant interaction, parental mental health, infant development and early ASD markers. Analysis will be by intention to treat using general linear models for RCTs.

**Ethics and dissemination:** This protocol has been approved by the Children's Health Queensland Hospital and Health Service Human Research Ethics Committee (HREC/19/QCHQ/50131) and The University of Queensland Human Research Ethics Committee (2019000558). If efficacy is demonstrated, the intervention has the potential for wide and accessible dissemination.

**Registration details:** This trial has been registered with the Australian New Zealand Clinical Trials Registry (ACTRN12618002046280).

## Article Summary

### Strengths and Limitations of this study

- First RCT to test a very early intervention for infants at risk of ASD implemented within the first 6 months of life.
- ENACT combines parent-mediated very early intervention with parental mental health support.
- Assessment includes neurodevelopmental assessments, as well as observations of parent-child interaction.



- ENACT is designed to be delivered by health professionals with relevant clinical experience in working with parents and in ACT, and could, if effective, be widely disseminated at little cost.

**Keywords:** Autism Spectrum Disorder, early intervention, maternal mental health, parent-infant interaction, infant development

**Word count:** 3871

For peer review only

## INTRODUCTION

### Autism Spectrum Disorder and the Broader Autism Phenotype

Autism spectrum disorder (ASD) is a heterogeneous neurodevelopmental condition defined by difficulties in social communication and interaction, and repetitive, restricted interests and activities<sup>1 2</sup>. It evolves from a complex interaction between genes and environment<sup>3 4</sup>, and has substantial impact on affected individuals, with 65% having a profound or severe activity limitation, needing help or supervision with communication, self-care and/or mobility<sup>5</sup>. Prevalence rates are 0.7% and 1.7-2.5% in Australia and the United States, respectively<sup>5-7</sup>. Diagnosis rests on developmental assessment and behavioural observations with most children 2 years or older at diagnosis<sup>8</sup>.

Infant siblings of children with ASD are at an increased risk of ASD themselves, with prevalence estimates of 18-20% from baby sibling studies<sup>9 10</sup>. A further 25% show elevated scores on the Autism Diagnostic Observation Schedule (ADOS), developmental delays and lower adaptive functioning<sup>11-13</sup>. Prospective sibling studies have identified a range of non-specific markers in infants at high-risk of ASD, including motor delays, poor visual reception, language delays, regulatory difficulties and changes in eye gaze at 6-12 months that precede the appearance of autism-specific features in the second year of life<sup>14-18</sup>. The diversity of early markers precludes a single developmental pathway to ASD and has been called 'the first year puzzle'<sup>19-23</sup>. Non-specific developmental markers may interact leading to increasingly abnormal trajectories of infant development. Visual, motor and regulatory difficulties may impact on emerging attention and emotional regulation<sup>19 24-26</sup>. Differences in visual, motor and regulatory abilities at six months of age correspond in timing with changes in whole-brain functional connectivity on MRI studies<sup>27 28</sup>. At 6 months of age, functional connectivity on diffusion tensor imaging MRI correctly predicted 9 of 11 infants that went on to be diagnosed with ASD at 24 months of age<sup>29</sup>. These findings support the conjecture that the developmental cascade leading to ASD begins early, *within the first six months of life*<sup>28</sup>.

To date, nine randomised controlled trials (RCTs) have tested parent-mediated early interventions with infants at risk of ASD implemented in the first 24 months, prior to confirmed ASD diagnosis<sup>30-36</sup>. Only one of these, an RCT of iBASIS-VIPP conducted with 54 infants at high familial risk of ASD recruited at 7-10 months of age has demonstrated sustained reduction of ASD related symptoms, but no change in the diagnostic outcome at 3 years<sup>30 34</sup>. iBASIS-VIPP begins after the infant is 6 months of age and focusses on changing parent behaviour. To date, no RCT has commenced with at-risk infants *younger than six months of age*, before earliest ASD markers and commencement of the cascade.

## ASD in the Family Context

Poor maternal mental health contributes to poorer long-term outcomes for infants, including those at risk of ASD<sup>37 38</sup>. Parents of children with ASD are at increased risk for depression and anxiety<sup>39 40</sup>, both due to parenting challenges and pre-existing histories<sup>41-43</sup>. Parents of infants with ASD are more likely to have an ASD or the Broader Autism Phenotype (BAP)<sup>44-47</sup>. The BAP may include rigidity, aloofness, social and communication difficulties<sup>47</sup>, with increased risk of depressive symptomatology, maladaptive coping and decreased social support<sup>47</sup>.

Mental health difficulties can contribute to reductions in responsive parenting<sup>48</sup>. Responsive parenting— child-directed, contingent, prompt, and appropriate to the child’s needs— is associated with better child outcomes<sup>49 50</sup>. Responsiveness is a dose-control system for environmental enrichment, enabling the child to obtain the necessary ‘experience expectant development’<sup>51 52</sup>. If a child is difficult to read, sends atypical or unclear signals, as in ASD, it is more challenging for parents to cultivate responsive patterns of interaction<sup>53</sup>.

By six months infants at risk of ASD may be showing an atypical style of interaction, with difficulty engaging in eye contact and joint attention<sup>15 26 50 54 55</sup>. Parent behaviour may shift towards intrusive parenting and high intensity approach behaviours in an attempt foster engagement and overcome the emerging social limitations of ASD<sup>50 56</sup>. The shift to directive parenting may impact further on the infant’s social development<sup>50 57</sup>. Importantly, commencing parent focused intervention *prior to six months*, before the shift towards directive parenting, has not been tested.

## Aim

To test the efficacy of ENACT (ENvironmental enrichment for infants; parenting with Acceptance and Commitment Therapy) for families of infants at risk of ASD via an RCT comparing ENACT to care-as-usual (CAU). ENACT is a newly-developed, very early intervention that targets infants’ social reciprocity through supported parent-infant interactions, while simultaneously supporting parental mental health and the parent-child relationship. ENACT commences prenatally.

## Hypotheses

We predict that families allocated to ENACT will show better outcomes compared to families allocated to CAU in terms of having:

### *Primary outcomes*

- 1  
2  
3  
4  
5  
6  
7  
8  
9
- H1: Lower scores for ASD symptomatology at as assessed on (a) the AOSI<sup>58 59</sup> at 12 months and (b) the greater ease of disengagement and greater reduction in the gap effect (reaction time at overlap minus reaction time at gap) on the Gap-Overlap task at 12 months in comparison to 6 months<sup>60 61</sup>.

### 10 *Secondary outcomes*

- 11  
12  
13  
14  
15  
16  
17  
18  
19  
20  
21  
22  
23  
24  
25  
26  
27  
28  
29  
30  
31  
32  
33  
34  
35  
36  
37  
38  
39  
40  
41  
42  
43  
44  
45  
46  
47  
48  
49  
50  
51  
52  
53  
54  
55  
56  
57  
58  
59  
60
- H2: Better scores on measures of parents' mental health at 3, 6 and 12 months as assessed on the Depression Anxiety and Stress Scales (DASS-21) and the Acceptance and Action Questionnaire (AAQ-II)<sup>62 63</sup>.
  - H3: Improved parent-infant interaction, with greater emotional availability and parental sensitivity, less parental intrusiveness, and greater child responsiveness, as assessed on the Emotional Availability Scales (EAS) Self-Report at 3, 6 and 12 months and Observed<sup>64</sup> at 6 months.
  - H4: Higher scores on measures of (a) infants' cognitive development, assessed using the Mullen Scales of Early Learning- Early Learning Composite at 6 and 12 months (MSEL-ELC; composite of the sub-domains of Visual Reception [VR], Fine Motor [FM], Receptive Language [RL] and Expressive Language [EL]),<sup>65</sup> and (b) infants' adaptive skills, assessed using the Vineland Adaptive Behaviour Scales Third Edition (VABS-3)<sup>66</sup> at 12 months.
  - H5: Higher scores on measures of infants' (a) motor development at 6 and 12 months assessed using the Hammersmith Infant Neurological Examination; (HINE<sup>67 68</sup>) and (b) fine and gross motor abilities (assessed using the MSEL)<sup>69</sup>.
  - H6: Higher scores on measures of infants' visual perceptual skills at 6 and 12 months, assessed on the Visual Reception scores on the MSEL<sup>24</sup>, and on symbolic cluster on the Communication and Symbolic Behaviour Scales – Developmental Profile (CSBS-DP)<sup>70</sup> and with reduced times on the Gap-Overlap task.
  - H7: Higher scores on measures of infant language development at 6 and 12 months, assessed by the Receptive Language and Expressive Language domains on the MSEL<sup>71</sup> and CSBS-DP<sup>72</sup>.
  - H8: Better scores on parent-report measures of infant regulation – specifically, (a) lower scores for Internalising and Externalising Behaviour, assessed on the Infant-Toddler Social and Emotional Assessment (ITSEA) at 12 months;<sup>73</sup> (b) lower scores on the Dysregulation scales of the ITSEA at 12 months; (c) better sleep on the Brief Infant Sleep Questionnaire (BISQ) at 3 and 6 months;<sup>74</sup> and (d) less cry behaviours on the Crying Pattern Questionnaire (CPQ) at 3 and 6 months of age<sup>75</sup>.

## METHODS AND ANALYSIS

## Design

The study is an RCT following CONSORT guidelines. After enrolment, and baseline assessments, mothers of infants at risk of ASD will be randomly allocated to intervention (ENACT) or CAU. Comparison to CAU is appropriate as ENACT is a newly developed intervention and this is the first trial. The CONSORT flow chart is depicted in Figure One.

[insert Figure One about here]

## Recruitment

Families will be recruited via advertisements distributed through Queensland ASD family support groups, schools and clinics (e.g. Autism Queensland, AEIOU Foundation for Children with Autism, Asperger Services Australia, Minds and Hearts) and Queensland Health Antenatal and Child Development Clinics. Families will be recruited during pregnancy and up to the infant reaching 7 weeks corrected age then followed over the first 12 months.

## Inclusion criteria

Participants must meet the following inclusion criteria: (1) the infant must have one or more biological siblings or a biological parent (mother or father) diagnosed with ASD; (2) the mother must agree to the assessment requirements; (3) the mother must have reliable internet access (e.g. ADSL); and (4) the mother must have sufficient English to complete assessments.

## Exclusion criteria

Any infant with known neurological or chromosomal disorder at the point of recruitment.

## Sample size

The target number of participants is 66 (ENACT n=33, CAU n=33), which will provide power of 80% (two-tailed,  $\alpha=0.05$ ) to detect a difference between groups of 0.75 SD on the AOSI. In a previous study with a similar sample the observed SD=4;<sup>30</sup> consequently we should be able to observe a difference of  $\geq 3$  units in this study.

## Blinding

Participants and intervention delivery facilitators cannot be blinded to group allocation. Assessors conducting the AOSI, Gap-Overlap task, MSEL and HINE assessments at 12 months CA will be blinded to group allocation, as will coders scoring the video/audio-recorded EAS observations, GMA, and Gap-Overlap task.

## Care-as-Usual interventions for infants at risk of ASD

Participants allocated to CAU will receive usual postnatal care. As developmental and autism-related concerns generally present after 12 months of age, it is expected that any targeted interventions provided in the community by usual care providers will fall outside the timeframe of the study.

## The ENACT Intervention

ENACT is a very early intervention targeting infant social reciprocity through supported parent-child interactions while simultaneously supporting parental mental health and the parent-child relationship using ACT. Core to ENACT is the social reciprocity intervention which teaches mothers to initiate and build sensitivity chains with their babies, with the goal that sensitivity chains become longer, increasingly complex and increasingly symbolic over time, and that the early social development of the infant is optimally supported. They should be mutually enjoyable, responsive and non-intrusive.

The three simple steps to building a sensitivity chain are for the mother to 1) stimulate an initial enjoyable interaction, 2) *wait* for the infant to signal their intent to continue, and 3) respond to the infant's signal, hence 'closing the loop' and building a link in the sensitivity chain. This will include a focus on: initially cultivating sensitivity chains through sensorimotor activities, using positive affect and predictable surprise to support the infant's involvement, maintaining reciprocal interactions with infants with atypical responsiveness, and avoiding parental intrusiveness with atypically responsive infants. This intervention is specifically targeting the earliest documented abnormalities in social behaviour in infants at risk of ASD<sup>76</sup>. This aspect of the ENACT intervention was developed specifically for this trial by Andrea McGlade, with input from Koa Whittingham.

ENACT also incorporates parental mental health support grounded in ACT, including values, mindfulness, experiential acceptance and cognitive defusion (distancing from thoughts). The ACT component within ENACT contains material previously trialled as the online intervention entitled Parenting Acceptance and Commitment Therapy or PACT<sup>48</sup>. The development of PACT was itself grounded in RCTs demonstrating the efficacy of a group ACT intervention for parents of children with neurodevelopmental disabilities<sup>77-80</sup>. ENACT also contains a small psychoeducation component on common early parenting challenges of sleep, crying and feeding, developed by Koa Whittingham and grounded in the existing literature and her previous work.<sup>81-84</sup> This focusses on understanding the biological regulation of sleep via the circadian clock and the sleep-wake homeostat, understanding the developmental pattern of infant crying including the crying peak, and planning ahead on where to seek help for feeding challenges.

1  
2  
3  
4  
5 ENACT is delivered to mothers (i) via an online course (approximately 8 hours' duration) using the  
6 edX platform ([www.edx.org/](http://www.edx.org/)) and (ii) through telehealth (videoconferencing via Zoom) consultations  
7 with a trained clinician. The edX course includes: videos and text explaining core concepts, interactive  
8 exercises, multiple choice questions, and videos of real parent-and-baby interactions. The social  
9 reciprocity very early intervention is delivered to the infant through the mother and other caregivers.  
10 Intervention delivery to mothers will commence prenatally, and mothers will receive fortnightly  
11 sessions with the clinician to support consolidation of learning. Mothers will be encouraged to work  
12 through the edX course at their own pace, with completion before their babies reach 8 weeks of age.  
13  
14  
15  
16  
17  
18  
19

20 Mothers will be encouraged to engage in regular practice of sensitivity chains, with a goal dose of 30  
21 minutes per day/5 days per week from 2 weeks of age and throughout the first year (total dose  
22 approximately 125 hours). The social reciprocity intervention will be integrated into ordinary everyday  
23 interactions including feeding, nappy changes and playful interactions. Consultation sessions will be  
24 conducted when the infant is 4 weeks, 8 weeks, 12 weeks, 4 months, 6 months, 8 months and 10  
25 months of age, with capacity for additional sessions as needed. Consultations will support mothers in  
26 finding opportunities to practice within everyday life, in tailoring interactions to their babies, and in  
27 adapting to their babies' developmental stage and skills. Mothers will be encouraged to initiate a  
28 sensitivity chain during the consultation, for the clinician's direct observation and feedback. In  
29 addition, clinical consultations will refer to ACT components, supporting maternal mental health  
30 throughout the first year. Clinical consultations will follow a specific protocol, and be recorded for  
31 fidelity. See Table 1.  
32  
33  
34  
35  
36  
37  
38  
39  
40  
41  
42

43 [insert Table 1 about here]  
44  
45

46 The primary target for recruitment and the intervention will be the mother, who will act as conduit to  
47 each infant's caregiving system. Other caregivers (e.g. fathers, grandparents) will be given access to  
48 the ENACT edX course and will be welcome to participate in clinical consultations as applicable.  
49 Mothers will also be encouraged to teach all other significant caregivers the sensitivity chain  
50 intervention via direct demonstration.  
51  
52  
53  
54  
55

## 56 Fidelity

57 The study clinician is experienced in working with families of children with neurodevelopmental  
58 disabilities, completed general training in ACT and also completed project-specific training via the  
59  
60

1  
2  
3 ENACT intervention manual. The clinician will receive clinical supervision from Dr Koa Whittingham  
4 to support fidelity. Course completion will be checked by the clinician. Clinical consultations will  
5 follow a specific protocol and will be recorded; 20% will be checked for fidelity (content and process)  
6 against the protocol. Qualitative feedback will be collected.  
7  
8  
9

## 10 11 12 **Patient and Public Involvement**

13 Consumer feedback was sought on the protocol, the study forms and the intervention. Consumer  
14 feedback was positive, with some changes to wording made following input.  
15  
16

## 17 18 **Study Procedure**

19  
20 Researchers will contact interested mothers to assess eligibility and provide detailed study information  
21 (see supplementary file: study information sheet and consent form). Mothers will provide written  
22 consent prior to completing baseline assessments, and computer-generated block randomisation will  
23 then be used to randomise families (1:1) to intervention or CAU via REDcap. Families allocated to  
24 intervention will receive immediate access to ENACT. Families allocated to CAU will receive routine  
25 antenatal and postnatal care.  
26  
27  
28  
29

30  
31  
32 Assessments will be conducted at baseline (prenatal), 3, 6, and 12 months CA. Parents will complete  
33 questionnaire measures online; mother-child relationship observations will be conducted via 20-  
34 minute video-recorded interactions; and child development assessments will be undertaken at [blinded  
35 for review] at 6 and 12 months of age. While completing ENACT, parents will be invited to provide  
36 feedback and suggestions for course improvement.  
37  
38  
39  
40

## 41 42 **Measures**

### 43 **BASELINE ASSESSMENTS**

44  
45 The *Parent Questionnaire* collects (1) general demographic information (parent age, education,  
46 income, family composition) and (2) information relevant to the ASD context, such as parent health  
47 history, and details of the diagnosis of the first-degree relative (parent or sibling) with ASD. Further  
48 information regarding infant delivery, perinatal history, and feeding history will be collected  
49 postnatally by brief phone interview  
50  
51  
52  
53

54  
55 The *Broad Autism Phenotype Questionnaire (BAPQ; 36-items)* assesses ASD-like features in adults  
56 through self-report or informant measure<sup>85</sup>. Participants rate how much each item applies to them on  
57 a 6-point Likert scale<sup>86</sup>. Internal consistency for the total scale is excellent ( $\alpha=.95$ ) and there is good  
58 inter-item reliability<sup>86</sup>.  
59  
60



## CHILD ASSESSMENTS

### **Autism symptomatology**

The *Autism Observation Schedule in Infants (AOSI; 12 months)* will be the primary clinical outcome measure assessing intervention effect on infant development and severity of autism symptomatology at 12 months<sup>59</sup>. It is an experimenter-led, semi-structured observational assessment tool, developed for research purposes to study the emergence of ASD-related behavioural markers in infancy (6–18 months)<sup>58 59</sup>. Five standardised activities are delivered between two periods of free play, with a total of 18 items to be scored. Inter-rater reliability of total marker counts (number of items marked as atypical) and total scores, respectively, is good at 6 months (.68 and .74) and excellent at 12 months (.92 and .93)<sup>58</sup>. Test-retest reliability for total marker counts and total scores is fair to good at .68 and .61, respectively<sup>58</sup>. The AOSI differentiates between high-risk and low-risk infants at 12-14 months<sup>87-89</sup>.

The *Gap-Overlap task (6 and 12 months)*<sup>60</sup> is used to assess visual attention by measuring differences in the efficiency of orienting towards peripheral stimuli. A mix of social and non-social stimuli will be used. Two trial types will be contrasted: Gap and Overlap. In the Gap condition, an interval of 200-250ms separates the disappearance of the central stimulus and the appearance of the peripheral one (facilitation). In the Overlap condition, the central stimulus remains visible and overlaps with the peripheral stimulus. This measures the ability to disengage from a central stimulus and to orient to a peripheral one. This difference between the Gap and Overlap times is called the Gap effect. Gap-Overlap time, measured in milliseconds, decreases from 6 to 12 months for typically developing infants<sup>15 90 91</sup>. Infants who are later diagnosed with ASD consistently show an *increase* in Gap-Overlap time between 6 and 12 months of age<sup>15 92 93</sup>. This has been called ‘sticky attention’. Test-retest reliability of the Gap-Overlap gap effect is  $r=.50$  in infants at age 10 months<sup>60</sup>.

### **Neurodevelopmental and motor assessments**

The *Mullen Scales of Early Learning (MSEL; 6 and 12 months)* has been used in the cognitive assessment of infants and children from birth until 68 months of age<sup>30 32 94-96</sup>. The MSEL has five scales: Gross Motor [GM], Visual Reception [VR], Fine Motor [FM], Expressive Language [EL], and Receptive Language [RL], as well as an Early Learning Composite (ELC) score that is composed of the VR, FM, EL, and RL subscales. The MSEL has demonstrated convergent and divergent construct validity in infants and children with ASD<sup>97-99</sup>. Interrater reliability has been reported as high ( $r = .91-.99$ )<sup>100</sup>.

1  
2  
3  
4 The *General Movements Assessment (GMA; 3 months)* is a predictive and discriminative tool that  
5 assesses infants' spontaneous motor activity from pre-term to 20 weeks CA<sup>101</sup>. Scoring is completed  
6 from a videorecording with 2 full movement sequences required for pattern recognition (approximately  
7 5 minutes)<sup>101</sup>. During the fidgety period from 9-20 weeks post-term, fidgety movements can be  
8 abnormal (exaggerated in amplitude and speed), sporadic (confined to a few body parts, never >3  
9 seconds between 9-16 weeks CA), or absent (fidgety movements not present between 9-16 weeks CA)  
10 (optimality scoring)<sup>101</sup>. Abnormal fidgety movements that are absent or abnormal at 12-14 weeks C.A  
11 are highly predictive of cerebral palsy as well as other neurodevelopmental disabilities including  
12 ASD<sup>102 103</sup>. The Baby Moves app will be used to film the videos and transfer the videos for assessment.  
13 GMA will be scored by accredited blinded assessors. It will be used as a predictive tool, to better  
14 understand the sample.  
15  
16  
17  
18  
19  
20  
21  
22  
23  
24

25 The *Hammersmith Infant Neurological Examination (HINE; 6 and 12 months)* is a standardised  
26 clinical neurodevelopmental assessment for infants from 2-24 months of age<sup>104</sup>. The HINE contains  
27 26 items across 5 domains, summed to provide a global optimality score, and can differentiate between  
28 low- and high-risk late preterm and term newborns at 6 and 12 months of age<sup>105-107</sup>.  
29  
30  
31  
32  
33

34 The *Vineland Adaptive Behaviour Scale (3rd ed.; VABS-III; 12 months)* is a standardised measure of  
35 adaptive behaviour, completed by caregivers and scored by a blinded assessor<sup>66</sup>. Standard scores are  
36 generated for the four domains (Communication, Daily Living Skills, Socialization, and Motor Skills)  
37 as well as a global score (Adaptive Behaviour Composite). It has good internal consistency, test-retest  
38 reliability, inter-interviewer reliability, and validity for young children including those with autism<sup>66</sup>.  
39  
40  
41  
42  
43

### 44 **Infant regulation**

45 The *Brief Infant Sleep Questionnaire (BISQ; 10-items; 3 and 6 months)* assesses parent-reported infant  
46 sleep patterns (nocturnal sleep duration, night waking and method of falling asleep), parent perception  
47 of infant sleep duration, and sleep-related (parent) behaviours for children from birth-36 months. It is  
48 well validated by comparisons with actigraphy, sleep diaries and caregiver-reported sleep<sup>74 75</sup>.  
49  
50  
51  
52

53 The *Crying Patterns Questionnaire (CPQ; 6-items; 3 and 6 months)* is a parent-report measure  
54 assessing: (1) the amount and time of day when infant crying occurs; (2) situations in which crying  
55 occurs; (3) whether the mother finds the crying distressing and seeks advice and help; and (4) the  
56 mother's responses to crying. In comparison to 24 hour cry-fuss diaries kept by mothers, the CPQ  
57 showed moderate-to-good validity (.51-.68) for total duration of crying scores<sup>75</sup>.  
58  
59  
60

1  
2  
3  
4 The *Infant Toddler Social & Emotional Assessment (ITSEA; 165-items; 12 months)* is a parent-report  
5 questionnaire used to assess social-emotional problems/competencies in the domains of behavioural  
6 dysregulation and competence. The ITSEA has established concurrent validity, strong test-retest  
7 reliability ( $\alpha=.75-.91$ ) and good internal reliability for each subscale ( $\alpha=.86$  for dysregulation,  $\alpha=.87$   
8 for externalising,  $\alpha=.85$  for internalising, and  $\alpha=.89$  for competence)<sup>108 109</sup>. The ITSEA has been  
9 validated for 12 months CA and discriminates between low- and high-risk infants, particularly within  
10 the domain of dysregulation<sup>73</sup>.  
11  
12

13  
14  
15  
16  
17  
18 The *Communication and Symbolic Behaviour Scales Developmental Profile (CSBS DP; 6 and 12*  
19 *months)* evaluates the symbolic abilities and communication skills of children aged 6-24 months<sup>70</sup>. It  
20 includes a 24-item Infant Toddler Checklist which is used as a developmental screening tool to detect  
21 autism<sup>110</sup>. The CSBS DP has excellent internal consistency ( $\alpha=.86-.92$ ), good test-retest reliability and  
22 good construct and concurrent validity<sup>70 111</sup>.  
23  
24  
25

### 26 27 28 **Mother-infant relationship**

29  
30 *Emotional Availability Scales (EAS; 6 months)*. Coders blind to intervention condition will use the  
31 EAS to score 20-minute naturalistic observations of parent-child interactions<sup>64</sup>. The parent-child  
32 interaction will occur in the family's own home, with the parent instructed to interact with their child  
33 as they normally would. The observations will be recorded via the videoconferencing software Zoom.  
34 The EAS is used to measure quality of parent-child relationships across six scales: parental sensitivity,  
35 parental structuring, parental non-intrusiveness, parental non-hostility, child responsiveness and child  
36 involvement<sup>64</sup>. The scales have high inter-rater reliability for the parent scales of sensitivity (.95),  
37 structuring (.87), non-intrusiveness (.81), non-hostility (.72) and the child scales of responsiveness (.87)  
38 and involvement (.87)<sup>112</sup>.  
39  
40  
41  
42  
43  
44  
45

46  
47 The *Emotional Availability - Self Report (EA-SR; 36-items; 3, 6 and 12 months)* is a parent-report  
48 questionnaire used to measure emotional availability in a dyadic relationship across 5 subscales:  
49 Intrusiveness, Hostility, Mutual Attunement, Affect Quality and Capacity to Involve the Parent.  
50 Reliability ranges from .71-.84 for all subscales except affect quality ( $\alpha=.49$ )<sup>112</sup>. All subscales (except  
51 for Intrusiveness) have moderate correlations with the corresponding EAS observed subscales, thus  
52 supporting the validity of the self-report measure<sup>112 113</sup>.  
53  
54  
55  
56  
57

### 58 59 **Maternal mental health**

60

1  
2  
3 The *Acceptance and Action Questionnaire (AAQ-II; 7-items; baseline, 3, 6 and 12 months)* is a self-  
4 report questionnaire measuring psychological flexibility, the key target of ACT<sup>63</sup>. The AAQ-II has  
5 good test-retest reliability and convergent validity and excellent internal consistency ( $\alpha=.94$ )<sup>63</sup>.  
6  
7  
8  
9

10 The *Depression Anxiety Stress Scales (DASS-21; 21-items; baseline, 3, 6 and 12 months)* assess  
11 symptoms of depression, anxiety, and stress in adults. The DASS-21 produces three subscales, each  
12 with good internal consistency: the Depression ( $\alpha=.91-.97$ ), Anxiety ( $\alpha =.81-.92$ ), and Stress  
13 ( $\alpha=.88-.95$ ) scales<sup>114</sup>, and a Total score. The DASS-21 has good convergent validity and acceptable  
14 discriminative validity<sup>114</sup>.  
15  
16  
17  
18  
19

### 20 **Comparison group**

21 A comparison group of 30 healthy low risk infants will be recruited and assessed on the Gap-Overlap  
22 task and the HINE at 6 and 12 months, and the AOSI at 12 months. This comparison data will support  
23 the interpretation of results, particularly for the novel Gap-Overlap task. To participate, the low risk  
24 infant would need to have no first-degree relatives diagnosed with ASD, be born at term and have no  
25 other known developmental risk. The comparison group will be recruited through social media and  
26 word of mouth.  
27  
28  
29  
30  
31  
32  
33

### 34 **Data Collection and Management**

35 Data will be entered onto the REDCap database in a potentially individually identifiable format. Once  
36 de-identified, data will be stored in a re-identifiable format on a secure electronic database protected  
37 by the [blinded for review] secure server, and only accessible to members of the research team.  
38  
39  
40  
41  
42

### 43 **Statistical Analysis**

44 Analysis (using STATA or SPSS) will follow standard methods for RCTs using comparisons between  
45 the two groups (e.g. general linear models, ANCOVA) and intention-to-treat analyses. Assumptions  
46 for parametric analyses will be assessed. Baseline scores will be included as covariates. Missing data  
47 will be handled using pro-rating and/or estimation maximisation depending upon the assessment and  
48 pattern of missingness.  
49  
50  
51  
52  
53

### 54 **Monitoring**

55 *Data monitoring*  
56  
57  
58  
59  
60

1  
2  
3 As this is a trial of a very early intervention with low risk, a data monitoring committee is not required.  
4 Any adverse events, particularly negative developmental outcomes, will be recorded and reported to  
5 the ethics committees and in the published results.  
6  
7  
8  
9

### 10 *Harms*

11 This study should not pose risks beyond those of everyday living. Any participants experiencing undue  
12 psychological distress will be referred to their general practitioner. For infants scoring at high  
13 developmental risk on the GMA, HINE, MSEL or AOSI, infants' general practitioners/paediatricians  
14 and parents will be notified. All families will be sent a paediatrician's report detailing 12-month  
15 developmental assessment results.  
16  
17  
18  
19  
20  
21

### 22 **Data Sharing Statement**

23 Data will be made available in a public, open access repository. Deidentified data will be made  
24 conditionally available to other researchers with approval from the research team.  
25  
26  
27  
28

### 29 **ETHICS AND DISSEMINATION**

30 ENACT should support mothers' mental health and may also support infant development. Ethical  
31 approval has been obtained from the Children's Health Queensland Hospital and Health Service  
32 Human Research Ethics Committee (HREC/19/QCHQ/50131) and The University of Queensland  
33 Human Research Ethics Committee (2019000558) and the trial registered (Australian New Zealand  
34 Clinical Trials Registry, ACTRN12618002046280). Study results will be disseminated through  
35 scientific journal publications and conference presentations. If shown to be effective, edX facilitates  
36 easy dissemination at minimal cost.  
37  
38  
39  
40  
41  
42  
43  
44

### 45 **DISCUSSION**

46 This study will test the efficacy of an innovative, very early intervention for infants at risk of ASD,  
47 integrating early social reciprocity intervention with parental mental health and parent-child  
48 relationship support. Potential limitations include recruitment and retention of parents with significant  
49 caregiving responsibilities; possible over-estimation of anticipated effect size; substantial burden of  
50 assessment for mothers; use of parent-report measures of infant regulation; and limited ability to assess  
51 day-to-day intervention implementation by mothers in the home environment.  
52  
53  
54  
55  
56  
57

58 **Funding Statement** This work is supported by two University of Queensland Graduate School  
59 Scholarships (UQGSS) (AG and KK), a Children's Hospital Foundation Early Career Fellowship  
60

(AEM; award ref. no. 50223), an NHMRC Research Fellowship (RNB; 1105038) and a private philanthropic donation. The private philanthropic donor does not have any role in this study.

**Competing Interests Statement:** ENACT was developed from PACT, an intervention developed by researchers at The University of Queensland including Koa Whittingham and Roslyn Boyd. Andrea McGlade and Koa Whittingham developed the of the very early intervention component of edX. ENACT has been developed using the online platform edX.

**Abbreviations:**

|          |                                                                                        |
|----------|----------------------------------------------------------------------------------------|
| AAQ-II   | Acceptance and Action Questionnaire                                                    |
| ACT      | Acceptance and Commitment Therapy                                                      |
| ADOS     | Autism Diagnostic Observation Schedule                                                 |
| ASD      | Autism Spectrum Disorder                                                               |
| BAP      | Broad Autism Phenotype                                                                 |
| BISQ     | Brief Infant Sleep Questionnaire                                                       |
| CA       | Corrected age                                                                          |
| CAU      | Care as Usual                                                                          |
| CSBS-DP  | Communication and Symbolic Behaviour Scales – Developmental Profile                    |
| CPQ      | Crying Pattern Questionnaire                                                           |
| DASS-21  | Depression Anxiety Stress Scale                                                        |
| EAS      | Emotional Availability Scales                                                          |
| EA-SR    | Emotional Availability Scales – Self Report                                            |
| EL       | Expressive Language                                                                    |
| ELC      | Early Learning Composite                                                               |
| ENACT    | ENvironmental enrichment for infants; parenting with Acceptance and Commitment Therapy |
| FM       | Fine Motor                                                                             |
| GMA      | General Movement Assessment                                                            |
| HINE     | Hammersmith Infant Neurological Examination                                            |
| ITSEA    | Infant-Toddler Social and Emotional Assessment                                         |
| MSEL     | Mullen Scales of Early Learning                                                        |
| RCT      | Randomised Controlled Trial                                                            |
| RL       | Receptive Language                                                                     |
| VABS-III | Vineland Adaptive Behaviour Scales Third Edition                                       |

1  
2  
3  
4  
5  
6  
7  
8  
9  
10  
11  
12  
13  
14  
15  
16  
17  
18  
19  
20  
21  
22  
23  
24  
25  
26  
27  
28  
29  
30  
31  
32  
33  
34  
35  
36  
37  
38  
39  
40  
41  
42  
43  
44  
45  
46  
47  
48  
49  
50  
51  
52  
53  
54  
55  
56  
57  
58  
59  
60

VR            Visual Reception

For peer review only

TABLE 1: ENACT Intervention Components

| Component                                  | Timing                                                                           | Content                                                                                                                                                                                                                                                                                                                           |
|--------------------------------------------|----------------------------------------------------------------------------------|-----------------------------------------------------------------------------------------------------------------------------------------------------------------------------------------------------------------------------------------------------------------------------------------------------------------------------------|
| ENACT EdX Course                           |                                                                                  |                                                                                                                                                                                                                                                                                                                                   |
| Module 1: Very early intervention approach | Begins antenatally with completion before child is 8 weeks                       | Outlines the very early intervention approach or sensitivity chains and includes multiple videos of parents and babies. Includes advice on early parenting challenges.                                                                                                                                                            |
| Module 2: Living a meaningful life         | Begins antenatally with completion before child is 8 weeks                       | Grounded in ACT, focuses on values and living a rewarding life.                                                                                                                                                                                                                                                                   |
| Module 3: Willingness                      | Begins antenatally with completion before child is 8 weeks                       | Grounded in ACT, focuses on mindfulness, acceptance and defusion (undermining the literality of language) processes.                                                                                                                                                                                                              |
| Module 4: Relating to others               | Begins antenatally with completion before child is 8 weeks                       | Grounded in ACT, focuses on acceptance, compassion and flexible parenting.                                                                                                                                                                                                                                                        |
| Module 5: Extending early intervention     | Begins antenatally with completion before child is 8 weeks                       | Extends sensitivity chain practice for older babies and provides advice for parents of babies experiencing challenges.                                                                                                                                                                                                            |
| Teleconferencing clinical consultations    |                                                                                  |                                                                                                                                                                                                                                                                                                                                   |
| ENACT EdX course completion support        | As needed throughout course completion                                           | Focuses on parental understanding of the EdX course, implementation of anything that is immediately relevant, and developing plans for the application of ENACT post-birth.                                                                                                                                                       |
| Developmental Consultations                | At 4 weeks, 8 weeks, 12 weeks, 4 months, 6 months, 8 months and 10 months of age | Focuses on expanding and extending sensitivity chain practice, working through any challenges and flexibly supporting parents and parental implementation of sensitivity chain practice using ACT principles. Includes the demonstration of a sensitivity chain whenever possible with opportunities for reflection and feedback. |



## References

1. American Psychiatric A. Diagnostic and statistical manual of mental disorders : DSM-5. Fifth edition.. ed: Arlington, VA : American Psychiatric Publishing 2013.
2. Mandy WP, Charman T, Skuse DH. Testing the construct validity of proposed criteria for DSM-5 autism spectrum disorder. *Journal of the American Academy of Child and Adolescent Psychiatry* 2012;51(1):41-50. doi: 10.1016/j.jaac.2011.10.013 [published Online First: 2011/12/20]
3. Chaste P, Leboyer M. Autism risk factors: genes, environment, and gene-environment interactions. *Dialogues in clinical neuroscience* 2012;14(3):281-92.
4. Wender C.L.A. V-VJ. Challenge and Potential for Research on Gene-Environment Interactions in Autism Spectrum Disorder. In: P. T, B L, eds. Gene-Environment Transactions in Developmental Psychopathology: Springer, Cham 2017.
5. AIHW. Autism in Australia, 2017.
6. Kogan MD, Vladutiu CJ, Schieve LA, et al. The Prevalence of Parent-Reported Autism Spectrum Disorder Among US Children. *Pediatrics* 2018;142(6) doi: 10.1542/peds.2017-4161
7. Baio J, Wiggins L, Christensen DL, et al. Prevalence of Autism Spectrum Disorder Among Children Aged 8 Years — Autism and Developmental Disabilities Monitoring Network, 11 Sites, United States, 2014. *MMWR Surveillance Summaries* 2018;67(6):1-23. doi: 10.15585/mmwr.ss6706a1
8. Bent CA, Dissanayake C, Barbaro J. Mapping the diagnosis of autism spectrum disorders in children aged under 7 years in Australia, 2010–2012. *Medical Journal of Australia* 2015;202(6):317-20. doi: 10.5694/mja14.00328
9. Ozonoff S, Young GS, Carter A, et al. Recurrence risk for autism spectrum disorders: a Baby Siblings Research Consortium study. *Pediatrics* 2011;128(3):e488-95. doi: 10.1542/peds.2010-2825 [published Online First: 2011/08/17]
10. Messinger DS, Young GS, Webb SJ, et al. Early sex differences are not autism-specific: A Baby Siblings Research Consortium (BSRC) study. *Molecular autism* 2015;6:32. doi: 10.1186/s13229-015-0027-y [published Online First: 2015/06/06]
11. Charman T, Young GS, Brian J, et al. Non-ASD outcomes at 36 months in siblings at familial risk for autism spectrum disorder (ASD): A baby siblings research consortium (BSRC) study. *Autism research : official journal of the International Society for Autism Research* 2017;10(1):169-78. doi: 10.1002/aur.1669 [published Online First: 2016/07/16]
12. Shephard E, Milosavljevic B, Pasco G, et al. Mid-childhood outcomes of infant siblings at familial high-risk of autism spectrum disorder. *Autism research : official journal of the International Society for Autism Research* 2017;10(3):546-57. doi: 10.1002/aur.1733 [published Online First: 2016/11/30]
13. Miller M, Iosif AM, Young GS, et al. School-age outcomes of infants at risk for autism spectrum disorder. *Autism research : official journal of the International Society for Autism Research* 2016;9(6):632-42. doi: 10.1002/aur.1572 [published Online First: 2015/10/10]
14. Bedford R, Gliga T, Shephard E, et al. Neurocognitive and observational markers: prediction of autism spectrum disorder from infancy to mid-childhood. *Molecular autism* 2017;8:49. doi: 10.1186/s13229-017-0167-3 [published Online First: 2017/10/12]
15. Clifford SM, Hudry K, Elsabbagh M, et al. Temperament in the first 2 years of life in infants at high-risk for autism spectrum disorders. *Journal of autism and developmental disorders* 2013;43(3):673-86. doi: 10.1007/s10803-012-1612-y [published Online First: 2012/08/25]
16. Leonard HC, Bedford R, Charman T, et al. Motor development in children at risk of autism: a follow-up study of infant siblings. *Autism : the international journal of research and practice* 2014;18(3):281-91. doi: 10.1177/1362361312470037 [published Online First: 2013/10/09]

17. Sacrey LA, Armstrong VL, Bryson SE, et al. Impairments to visual disengagement in autism spectrum disorder: a review of experimental studies from infancy to adulthood. *Neuroscience and biobehavioral reviews* 2014;47:559-77. doi: 10.1016/j.neubiorev.2014.10.011 [published Online First: 2014/12/03]
18. Franchini M, Duku E, Armstrong V, et al. Variability in Verbal and Nonverbal Communication in Infants at Risk for Autism Spectrum Disorder: Predictors and Outcomes. *Journal of autism and developmental disorders* 2018;48(10):3417-31. doi: 10.1007/s10803-018-3607-9
19. Jones EJH, Gliga T, Bedford R, et al. Developmental pathways to autism: A review of prospective studies of infants at risk. *Neuroscience and biobehavioral reviews* 2014;39(100):1-33. doi: 10.1016/j.neubiorev.2013.12.001
20. Johnson MH, Gliga T, Jones E, et al. Annual research review: Infant development, autism, and ADHD--early pathways to emerging disorders. *Journal of child psychology and psychiatry, and allied disciplines* 2015;56(3):228-47. doi: 10.1111/jcpp.12328
21. Charman T. Mapping Early Symptom Trajectories in Autism Spectrum Disorder: Lessons and Challenges for Clinical Practice and Science. *Journal of the American Academy of Child and Adolescent Psychiatry* 2018;57(11):820-21. doi: 10.1016/j.jaac.2018.06.021 [published Online First: 2018/11/06]
22. Elsabbagh M, Johnson MH. Autism and the Social Brain: The First-Year Puzzle. *Biological psychiatry* 2016;80(2):94-99. doi: 10.1016/j.biopsych.2016.02.019 [published Online First: 2016/04/27]
23. Holmboe K, Elsabbagh M, Volein A, et al. Frontal cortex functioning in the infant broader autism phenotype. *Infant behavior & development* 2010;33(4):482-91. doi: 10.1016/j.infbeh.2010.05.004 [published Online First: 2010/07/09]
24. Estes A, Zwaigenbaum L, Gu H, et al. Behavioral, cognitive, and adaptive development in infants with autism spectrum disorder in the first 2 years of life. *Journal of neurodevelopmental disorders* 2015;7(1):24. doi: 10.1186/s11689-015-9117-6 [published Online First: 2015/07/24]
25. Trevarthen C, Delafield-Butt JT. Autism as a developmental disorder in intentional movement and affective engagement. *Frontiers in integrative neuroscience* 2013;7:49-49. doi: 10.3389/fnint.2013.00049
26. Tsang T. Mechanisms Conferring Risk versus Resilience for Autism Spectrum Disorder in Early Infancy. In: Dapretto M, Johnson SP, Bookheimer S, et al., eds.: ProQuest Dissertations Publishing, 2018.
27. Conti E, Sara E, Viviana E, et al. The first thousand days of the autistic brain: a systematic review of diffusion imaging studies. *Frontiers in Human Neuroscience* 2015;9 doi: 10.3389/fnhum.2015.00159
28. Wolff JJ, Jacob S, Elison JT. The journey to autism: Insights from neuroimaging studies of infants and toddlers. 2018;30(2):479-95. doi: 10.1017/S0954579417000980
29. Emerson RW, Adams C, Nishino T, et al. Functional neuroimaging of high-risk 6-month-old infants predicts a diagnosis of autism at 24 months of age. *Science translational medicine* 2017;9(393) doi: 10.1126/scitranslmed.aag2882 [published Online First: 2017/06/09]
30. Green J, Charman T, Pickles A, et al. Parent-mediated intervention versus no intervention for infants at high risk of autism: a parallel, single-blind, randomised trial. *The Lancet Psychiatry* 2015;2(2):133-40. doi: 10.1016/S2215-0366(14)00091-1
31. Baranek GT, Watson LR, Turner-Brown L, et al. Preliminary efficacy of adapted responsive teaching for infants at risk of autism spectrum disorder in a community sample. *Autism research and treatment* 2015;2015:386951. doi: 10.1155/2015/386951 [published Online First: 2015/02/05]
32. Watson LR, Crais ER, Baranek GT, et al. Parent-Mediated Intervention for One-Year-Olds Screened as At-Risk for Autism Spectrum Disorder: A Randomized Controlled Trial. *Journal*

- 1  
2  
3 *of autism and developmental disorders* 2017;47(11):3520-40. doi: 10.1007/s10803-017-3268-  
4 0 [published Online First: 2017/09/02]
- 5  
6 33. Whitehouse AJO, Varcin JK, Alvares GA, et al. Pre-emptive intervention versus treatment as usual  
7 for infant showing early behavioural risk signs of autism spectrum disorder: a single-blind,  
8 randomised controlled trial. *Lancet Child and Adolescent Health* 2019:30184-1.
- 9  
10 34. Green J, Pickles A, Pasco G, et al. Randomised trial of a parent-mediated intervention for infants  
11 at high risk for autism: longitudinal outcomes to age 3 years. *Journal of Child Psychology and*  
12 *Psychiatry* 2017;58(12):1330-40. doi: 10.1111/jcpp.12728
- 13  
14 35. Kasari C, Siller M, Huynh LN, et al. Randomized controlled trial of parental responsiveness  
15 intervention for toddlers at high risk for autism. *Infant Behavior and Development*  
16 2014;37(4):711-21. doi: 10.1016/j.infbeh.2014.08.007
- 17  
18 36. Jones EJH, Dawson G, Kelly J, et al. Parent-delivered early intervention in infants at risk for ASD:  
19 Effects on electrophysiological and habituation measures of social attention. *Autism research :  
20 official journal of the International Society for Autism Research* 2017;10(5):961-72. doi:  
21 10.1002/aur.1754 [published Online First: 2017/03/01]
- 22  
23 37. Field T. Infants of depressed mothers. *Development and psychopathology* 1992;4(1):49-66. doi:  
24 10.1017/S0954579400005551 [published Online First: 2008/10/31]
- 25  
26 38. Quintero N, McIntyre LL. Sibling Adjustment and Maternal Well-Being: An Examination of  
27 Families With and Without a Child With an Autism Spectrum Disorder. *Focus Autism Other*  
28 *Dev Disabl* 2010;25(1):37-46. doi: 10.1177/1088357609350367
- 29  
30 39. Yorke I, White P, Weston A, et al. The Association Between Emotional and Behavioral Problems  
31 in Children with Autism Spectrum Disorder and Psychological Distress in Their Parents: A  
32 Systematic Review and Meta-analysis. *Journal of autism and developmental disorders*  
33 2018;48(10):3393-415. doi: 10.1007/s10803-018-3605-y [published Online First: 2018/05/20]
- 34  
35 40. Nicholas DB, Zwaigenbaum L, Ing S, et al. "Live It to Understand It": The Experiences of Mothers  
36 of Children With Autism Spectrum Disorder. *Qualitative health research* 2016;26(7):921-34.  
37 doi: 10.1177/1049732315616622 [published Online First: 2015/11/28]
- 38  
39 41. Wiggins LD, Rubenstein E, Daniels J, et al. A Phenotype of Childhood Autism Is Associated with  
40 Preexisting Maternal Anxiety and Depression. *Journal of abnormal child psychology* 2018 doi:  
41 10.1007/s10802-018-0469-8 [published Online First: 2018/08/22]
- 42  
43 42. Yirmiya N, Shaked M. Psychiatric Disorders in Parents of Children with Autism: A Meta-Analysis.  
44 *Journal of Child Psychology and Psychiatry* 2005;46(1):69-83. doi: 10.1111/j.1469-  
45 7610.2004.00334.x
- 46  
47 43. Goodman SH, Rouse MH, Connell AM, et al. Maternal Depression and Child Psychopathology:  
48 A Meta-Analytic Review. *Clinical Child and Family Psychology Review* 2011;14(1):1-27. doi:  
49 10.1007/s10567-010-0080-1
- 50  
51 44. Seidman I, Yirmiya N, Milstein S, et al. The Broad Autism Phenotype Questionnaire: mothers  
52 versus fathers of children with an autism spectrum disorder. *Journal of autism and*  
53 *developmental disorders* 2012;42(5):837-46. doi: 10.1007/s10803-011-1315-9 [published  
54 Online First: 2011/06/28]
- 55  
56 45. Rubenstein E, Chawla D. Broader autism phenotype in parents of children with autism: a  
57 systematic review of percentage estimates. *Journal of child and family studies*  
58 2018;27(6):1705-20. doi: 10.1007/s10826-018-1026-3 [published Online First: 2018/05/08]
- 59  
60 46. Rubenstein E, Wiggins LD, Schieve LA, et al. Associations between parental broader autism  
phenotype and child autism spectrum disorder phenotype in the Study to Explore Early  
Development. *Autism : the international journal of research and practice*  
2018:1362361317753563. doi: 10.1177/1362361317753563 [published Online First:  
2018/01/30]

- 1
  - 2
  - 3
  - 4
  - 5
  - 6
  - 7
  - 8
  - 9
  - 10
  - 11
  - 12
  - 13
  - 14
  - 15
  - 16
  - 17
  - 18
  - 19
  - 20
  - 21
  - 22
  - 23
  - 24
  - 25
  - 26
  - 27
  - 28
  - 29
  - 30
  - 31
  - 32
  - 33
  - 34
  - 35
  - 36
  - 37
  - 38
  - 39
  - 40
  - 41
  - 42
  - 43
  - 44
  - 45
  - 46
  - 47
  - 48
  - 49
  - 50
  - 51
  - 52
  - 53
  - 54
  - 55
  - 56
  - 57
  - 58
  - 59
  - 60
47. Ingersoll B, Hambrick DZ. The relationship between the broader autism phenotype, child severity, and stress and depression in parents of children with autism spectrum disorders. *Research in autism spectrum disorders* 2011;5(1):337-44. doi: <https://doi.org/10.1016/j.rasd.2010.04.017>
48. Whittingham K, Sheffield J, Boyd RN. Parenting acceptance and commitment therapy: a randomised controlled trial of an innovative online course for families of children with cerebral palsy. *BMJ Open* 2016;6(10):e012807. doi: 10.1136/bmjopen-2016-012807
49. Lowe JR, MacLean PC, Duncan AF, et al. Association of maternal interaction with emotional regulation in 4- and 9-month infants during the Still Face Paradigm. *Infant behavior & development* 2012;35(2):295-302. doi: 10.1016/j.infbeh.2011.12.002 [published Online First: 2012/01/06]
50. Harker CM, Ibanez LV, Nguyen TP, et al. The Effect of Parenting Style on Social Smiling in Infants at High and Low Risk for ASD. *Journal of autism and developmental disorders* 2016;46(7):2399-407. doi: 10.1007/s10803-016-2772-y [published Online First: 2016/03/24]
51. Sullivan K, Stone WL, Dawson G. Potential neural mechanisms underlying the effectiveness of early intervention for children with autism spectrum disorder. *Research in developmental disabilities* 2014;35(11):2921-32. doi: 10.1016/j.ridd.2014.07.027
52. LeBlanc JJ, Fagiolini M. Autism: A "Critical Period" Disorder? *Neural Plasticity* 2011;2011(2011) doi: 10.1155/2011/921680
53. Killmeyer S, Kaczmarek L. Parent training and joint engagement in young children with autism spectrum disorder. *Autism & Developmental Language Impairments* 2017;2 doi: 10.1177/2396941517699214
54. Elsabbagh M, Gliga T, Pickles A, et al. The development of face orienting mechanisms in infants at-risk for autism. *Behavioural brain research* 2013;251:147-54. doi: 10.1016/j.bbr.2012.07.030 [published Online First: 2012/08/01]
55. Elsabbagh M, Holmboe K, Gliga T, et al. Social and attention factors during infancy and the later emergence of autism characteristics. *Progress in brain research* 2011;189:195-207. doi: 10.1016/b978-0-444-53884-0.00025-7 [published Online First: 2011/04/15]
56. Wan MW, Green J, Elsabbagh M, et al. Parent-infant interaction in infant siblings at risk of autism. *Research in developmental disabilities* 2012;33(3):924-32. doi: 10.1016/j.ridd.2011.12.011 [published Online First: 2012/01/20]
57. Wan MW, Green J, Elsabbagh M, et al. Quality of interaction between at-risk infants and caregiver at 12-15 months is associated with 3-year autism outcome. *Journal of child psychology and psychiatry, and allied disciplines* 2013;54(7):763-71. doi: 10.1111/jcpp.12032 [published Online First: 2012/12/12]
58. Bryson SE, Zwaigenbaum L, McDermott C, et al. The Autism Observation Scale for Infants: scale development and reliability data. *Journal of autism and developmental disorders* 2008;38(4):731-8. doi: 10.1007/s10803-007-0440-y [published Online First: 2007/09/18]
59. Bryson S, Zwaigenbaum L. Autism Observation Scale for Infants. In Patel V, Preedy V, Martin C (eds) *Comprehensive Guide to Autism*: Springer, New York, NY 2014:299-310.
60. Cousijn J, Hessels RS, Van Der Stigchel S, et al. Evaluation of the Psychometric Properties of the Gap-Overlap Task in 10-Month-Old Infants. *Infancy : the official journal of the International Society on Infant Studies* 2017;22(4):571-79. doi: 10.1111/infa.12185
61. Elsabbagh M, Volein A, Holmboe K, et al. Visual orienting in the early broader autism phenotype: disengagement and facilitation. *Journal of child psychology and psychiatry, and allied disciplines* 2009;50(5):637-42. doi: 10.1111/j.1469-7610.2008.02051.x [published Online First: 2009/03/21]
62. Brown TA, Chorpita BF, Korotitsch W, et al. Psychometric properties of the Depression Anxiety Stress Scales (DASS) in clinical samples. *Behaviour Research and Therapy* 1997;35(1):79-89. doi: [https://doi.org/10.1016/S0005-7967\(96\)00068-X](https://doi.org/10.1016/S0005-7967(96)00068-X)

- 1  
2  
3  
4  
5  
6  
7  
8  
9  
10  
11  
12  
13  
14  
15  
16  
17  
18  
19  
20  
21  
22  
23  
24  
25  
26  
27  
28  
29  
30  
31  
32  
33  
34  
35  
36  
37  
38  
39  
40  
41  
42  
43  
44  
45  
46  
47  
48  
49  
50  
51  
52  
53  
54  
55  
56  
57  
58  
59  
60
63. Mitchell AE, Whittingham K, Steindl S, et al. Feasibility and acceptability of a brief online self-compassion intervention for mothers of infants. *Archives of Women's Mental Health* 2018;21(5):553-61. doi: 10.1007/s00737-018-0829-y
  64. Biringen Z, Derscheid D, Vliegen N, et al. Emotional availability (EA): Theoretical background, empirical research using the EA Scales, and clinical applications. *Developmental Review* 2014;34(2):114-67. doi: <https://doi.org/10.1016/j.dr.2014.01.002>
  65. Burns TG, King TZ, Spencer KS. Mullen Scales of Early Learning: The Utility in Assessing Children Diagnosed with Autism Spectrum Disorders, Cerebral Palsy, and Epilepsy. *Applied Neuropsychology: Child* 2012;2(1):1-10. doi: 10.1080/21622965.2012.682852
  66. Sparrow SS, Cicchetti DV, Saulnier C. Vineland Adaptive Behavior Scales, third edition (Vineland—3). Bloomington, MN: Pearson 2016.
  67. Haataja L, Cowan F, Mercuri E, et al. Application of a scorable neurologic examination in healthy term infants aged 3 to 8 months. *The Journal of pediatrics* 2003;143(4):546-46. doi: 10.1067/S0022-3476(03)00393-7
  68. Haataja L, Mercuri E, Regev R, et al. Optimality score for the neurologic examination of the infant at 12 and 18 months of age. *The Journal of pediatrics* 1999;135(2):153-61. doi: 10.1016/S0022-3476(99)70016-8
  69. Morgan C, Honan I, Allsop A, et al. Psychometric Properties of Assessments of Cognition in Infants With Cerebral Palsy or Motor Impairment: A Systematic Review. *Journal of pediatric psychology* 2018 doi: 10.1093/jpepsy/jsy068
  70. Wetherby A, Allen L, Cleary J, et al. Validity and reliability of the communication and symbolic behavior scales developmental profile with very young children. *Journal of Speech, Language, and Hearing Research* 2002;45(6):1202-18. doi: 10.1044/1092-4388(2002/097)
  71. Luyster RJ, Kadlec MB, Carter A, et al. Language Assessment and Development in Toddlers with Autism Spectrum Disorders. *Journal of autism and developmental disorders* 2008;38(8):1426-38. doi: 10.1007/s10803-007-0510-1
  72. Watt N, Wetherby A, Shumway S. Prelinguistic Predictors of Language Outcome at 3 Years of Age. *Journal of Speech, Language, and Hearing Research* 2006;49(6):1224-37. doi: 10.1044/1092-4388(2006/088)
  73. Sanner N, Smith L, Wentzel-Larsen T, et al. Early identification of social-emotional problems: Applicability of the Infant-Toddler Social Emotional Assessment (ITSEA) at its lower age limit. *Infant Behavior and Development* 2016;42:69-85. doi: 10.1016/j.infbeh.2015.11.001
  74. Teng A, Bartle A, Sadeh A, et al. Infant and toddler sleep in Australia and New Zealand. *Journal of paediatrics and child health* 2012;48(3):268-73. doi: 10.1111/j.1440-1754.2011.02251.x [published Online First: 2011/11/24]
  75. Wolke D, Meyer R, Gray P. Validity of the crying pattern questionnaire in a sample of excessively crying babies. *Journal of Reproductive and Infant Psychology*, 1994;12(2):105-14.
  76. Jones EJ, Venema K, Earl R, et al. Reduced engagement with social stimuli in 6-month-old infants with later autism spectrum disorder: a longitudinal prospective study of infants at high familial risk. *Journal of neurodevelopmental disorders* 2016;8:7. doi: 10.1186/s11689-016-9139-8 [published Online First: 2016/03/17]
  77. Whittingham K, Sanders M, McKinlay L, et al. Interventions to Reduce Behavioral Problems in Children With Cerebral Palsy: An RCT. *Pediatrics* 2014;133(5):e1249-e57. doi: 10.1542/peds.2013-3620
  78. Whittingham K, Sanders MR, McKinlay L, et al. Parenting Intervention Combined With Acceptance and Commitment Therapy: A Trial With Families of Children With Cerebral Palsy. *Journal of pediatric psychology* 2016;41(5):531-42. doi: 10.1093/jpepsy/jsv118 [published Online First: 2015/12/26]
  79. Brown FL, Whittingham K, Boyd RN, et al. Improving child and parenting outcomes following paediatric acquired brain injury: a randomised controlled trial of Stepping Stones Triple P plus

- 1  
2  
3 Acceptance and Commitment Therapy. *Journal of child psychology and psychiatry, and allied*  
4 *disciplines* 2014;55(10):1172-83. doi: 10.1111/jcpp.12227 [published Online First: 2014/03/19]
- 5  
6 80. Brown FL, Whittingham K, McKinlay L, et al. Efficacy of stepping stones Triple P plus a stress  
7 management adjunct for parents of children with an acquired brain injury: The protocol of a  
8 randomised controlled trial. *Brain Impairment* 2013;14(2):253-69. doi:  
9 10.1017/BrImp.2013.18
- 10  
11 81. Whittingham K, Coyne LW. Acceptance and commitment therapy : the clinician's guide for  
12 supporting parents. London: Academic Press 2019.
- 13  
14 82. Whittingham K, Douglas P. Optimizing parent-infant sleep from birth to 6 months: a new paradigm.  
15 *Infant mental health journal* 2014;35(6):614-23. doi: 10.1002/imhj.21455 [published Online  
16 First: 2015/03/24]
- 17  
18 83. Zeifman DM, St James-Roberts I. Parenting the Crying Infant. *Curr Opin Psychol* 2017;15:149-  
19 54. doi: 10.1016/j.copsyc.2017.02.009 [published Online First: 2017/07/08]
- 20  
21 84. Whittingham K. Parenting in context. *Journal of Contextual Behavioral Science* 2014;3(3):212-  
22 15. doi: 10.1016/j.jcbs.2014.01.001
- 23  
24 85. Hurley RS, Losh M, Parlier M, et al. The broad autism phenotype questionnaire. *J Autism Dev*  
25 *Disord* 2007;37(9):1679-90. doi: 10.1007/s10803-006-0299-3 [published Online First:  
26 2006/12/06]
- 27  
28 86. Sasson NJ, Lam KS, Childress D, et al. The broad autism phenotype questionnaire: prevalence and  
29 diagnostic classification. *Autism research : official journal of the International Society for*  
30 *Autism Research* 2013;6(2):134-43. doi: 10.1002/aur.1272 [published Online First: 2013/02/22]
- 31  
32 87. Brian J, Bryson SE, Garon N, et al. Clinical assessment of autism in high-risk 18-month-olds.  
33 *Autism : the international journal of research and practice* 2008;12(5):433-56. doi:  
34 10.1177/1362361308094500 [published Online First: 2008/09/23]
- 35  
36 88. Gammer I, Bedford R, Elsabbagh M, et al. Behavioural markers for autism in infancy: scores on  
37 the Autism Observational Scale for Infants in a prospective study of at-risk siblings. *Infant*  
38 *behavior & development* 2015;38:107-15. doi: 10.1016/j.infbeh.2014.12.017 [published  
39 Online First: 2015/02/07]
- 40  
41 89. Georgiades S, Szatmari P, Zwaigenbaum L, et al. A prospective study of autistic-like traits in  
42 unaffected siblings of probands with autism spectrum disorder. *JAMA psychiatry*  
43 2013;70(1):42-8. doi: 10.1001/2013.jamapsychiatry.1 [published Online First: 2012/09/05]
- 44  
45 90. Matsuzawa M, Shimojo S. Infants' fast saccades in the gap paradigm and development of visual  
46 attention. *Infant Behavior and Development* 1997;20(4):449-55.
- 47  
48 91. McConnell BA, Bryson S. Visual attention and temperament: Developmental data from the first 6  
49 months of life. *Infant Behavior and Development* 2005;28(4):537-44.
- 50  
51 92. Zwaigenbaum L, Bryson S, Rogers T, et al. Behavioral manifestations of autism in the first year  
52 of life. *International journal of developmental neuroscience : the official journal of the*  
53 *International Society for Developmental Neuroscience* 2005;23(2-3):143-52. doi:  
54 10.1016/j.ijdevneu.2004.05.001 [published Online First: 2005/03/08]
- 55  
56 93. Bryson S, Garon N, McMullen T, et al. Impaired disengagement of attention and its relationship  
57 to emotional distress in infants at high-risk for autism spectrum disorder. *Journal of Clinical*  
58 *and Experimental Neuropsychology* 2018;40(5):487-501. doi:  
59 10.1080/13803395.2017.1372368
- 60  
61 94. Brian AJ, Roncadin C, Duku E, et al. Emerging cognitive profiles in high-risk infants with and  
62 without autism spectrum disorder. *Research in autism spectrum disorders* 2014;8(11):1557-  
63 66. doi: 10.1016/j.rasd.2014.07.021
- 64  
65 95. Garon N, Zwaigenbaum L, Bryson S, et al. Temperament and its Association with Autism  
66 Symptoms in a High-risk Population. *Journal of abnormal child psychology* 2016;44(4):757-  
67 69. doi: 10.1007/s10802-015-0064-1 [published Online First: 2015/09/01]

- 1  
2  
3 96. Ozonoff S, Young GS, Brian J, et al. Diagnosis of Autism Spectrum Disorder After Age 5 in  
4 Children Evaluated Longitudinally Since Infancy. *Journal of the American Academy of Child*  
5 *and Adolescent Psychiatry* 2018;57(11):849-57.e2. doi: 10.1016/j.jaac.2018.06.022 [published  
6 Online First: 2018/11/06]  
7  
8 97. Bishop SL, Guthrie W, Coffing M, et al. Convergent Validity of the Mullen Scales of Early  
9 Learning and the Differential Ability Scales in Children with Autism Spectrum Disorders.  
10 *American Journal on Intellectual and Developmental Disabilities* 2011;116(5):331-43. doi:  
11 10.1352/1944-7558-116.5.331  
12  
13 98. Swineford LB, Guthrie W, Thurm A. Convergent and Divergent Validity of the Mullen Scales of  
14 Early Learning in Young Children With and Without Autism Spectrum Disorder.  
15 *Psychological Assessment* 2015;27(4):1364-78. doi: 10.1037/pas0000116  
16  
17 99. Akshoomoff N. Use of the Mullen Scales of Early Learning for the Assessment of Young Children  
18 with Autism Spectrum Disorders. *Child Neuropsychology* 2006;12(4-5):269-77. doi:  
19 10.1080/09297040500473714  
20  
21 100. Mullen EM. Mullen Scales of Early Learning. Circle Pines, MN: American Guidance Service.  
22 1995.  
23  
24 101. Einspieler C, Prechtl HFR. Prechtl's method on the qualitative assessment of general movements  
25 in preterm, term and young infants: London : Mac Keith Press  
26 Cambridge, UK  
27 New York : Distributed by Cambridge University Press 2004.  
28  
29 102. Einspieler C, Sigafos J, Bolte S, et al. Highlighting the first 5 months of life: General movements  
30 in infants later diagnosed with autism spectrum disorder or Rett Syndrome. *Research in autism*  
31 *spectrum disorders* 2014;8(3):286-91. doi: 10.1016/j.rasd.2013.12.013 [published Online First:  
32 2014/03/01]  
33  
34 103. Zappella M, Einspieler C, Bartl-Pokorny KD, et al. What do home videos tell us about early motor  
35 and socio-communicative behaviours in children with autistic features during the second year  
36 of life--An exploratory study. *Early human development* 2015;91(10):569-75. doi:  
37 10.1016/j.earlhumdev.2015.07.006 [published Online First: 2015/08/08]  
38  
39 104. Haataja L, Mercuri E, Regev R, et al. Optimality score for the neurologic examination of the  
40 infant at 12 and 18 months of age. *J Pediatr* 1999;135(2 Pt 1):153-61. [published Online First:  
41 1999/08/04]  
42  
43 105. Maitre NL, Chorna O, Romeo DM, et al. Implementation of the Hammersmith Infant  
44 Neurological Examination in a High-Risk Infant Follow-Up Program. *Pediatric Neurology*  
45 2016;65:31-38. doi: 10.1016/j.pediatrneurol.2016.09.010  
46  
47 106. Romeo DM, Brogna C, Sini F, et al. Early psychomotor development of low-risk preterm infants:  
48 Influence of gestational age and gender. *European Journal of Paediatric Neurology*  
49 2016;20(4):518-23. doi: 10.1016/j.ejpn.2016.04.011  
50  
51 107. Chatziioannidis I, Kyriakidou M, Exadaktylou S, et al. Neurological outcome at 6 and 12 months  
52 corrected age in hospitalised late preterm infants -a prospective study. *European Journal of*  
53 *Paediatric Neurology* 2018;22(4):602-09. doi: 10.1016/j.ejpn.2018.02.013  
54  
55 108. Briggs-Gowan M, Carter A. Infant Toddler Social & Emotional Assessment (ITSEA)  
56 Manual.2001.  
57  
58 109. Carter A, Briggs-Gowan M. ITSEA: Infant-Toddler Social and Emotional Assessment.  
59 Massachusetts: PsychCorp 2006.  
60  
61 110. Wetherby AM, Woods J, Allen L, et al. Early Indicators of Autism Spectrum Disorders in the  
62 Second Year of Life. *Journal of autism and developmental disorders* 2004;34(5):473-93. doi:  
63 10.1007/s10803-004-2544-y  
64  
65 111. Eadie PA, Ukoumunne O, Skeat J, et al. Assessing early communication behaviours: structure  
66 and validity of the Communication and Symbolic Behaviour Scales Developmental Profile

- 1  
2  
3 (CSBS-DP) in 12-month-old infants. *International Journal of Language & Communication*  
4 *Disorders*, 2010, Vol45(5), p572-585 2010;45(5):572-85. doi: 10.3109/13682820903277944  
5  
6 112. Vliegen N, Luyten P, Biringen Z. A Multimethod Perspective on Emotional Availability in the  
7 Postpartum Period. *Parenting* 2009;9(3-4):228-43. doi: 10.1080/15295190902844514  
8  
9 113. Luyten P, Mayes LC, Nijssens L, et al. The parental reflective functioning questionnaire:  
10 Development and preliminary validation. *PloS one* 2017;12(5):e0176218. doi:  
11 10.1371/journal.pone.0176218  
12  
13 114. Gloster AT, Rhoades HM, Novy D, et al. Psychometric properties of the Depression Anxiety and  
14 Stress Scale-21 in older primary care patients. *Journal of affective disorders* 2008;110(3):248-  
15 59. doi: 10.1016/j.jad.2008.01.023 [published Online First: 03/04]  
16  
17  
18  
19  
20  
21  
22  
23  
24  
25  
26  
27  
28  
29  
30  
31  
32  
33  
34  
35  
36  
37  
38  
39  
40  
41  
42  
43  
44  
45  
46  
47  
48  
49  
50  
51  
52  
53  
54  
55  
56  
57  
58  
59  
60



1  
2  
3  
4  
5  
6  
7  
8  
9  
10  
11  
12  
13  
14  
15  
16  
17  
18  
19  
20  
21  
22  
23  
24  
25  
26  
27  
28  
29  
30  
31  
32  
33  
34  
35  
36  
37  
38  
39  
40  
41  
42  
43  
44  
45  
46  
47  
48  
49  
50  
51  
52  
53  
54  
55  
56  
57  
58  
59  
60

Figure 1: CONSORT flow chart of the ENACT study

For peer review only

**FIGURE 1: CONSORT flow chart of the ENACT study**

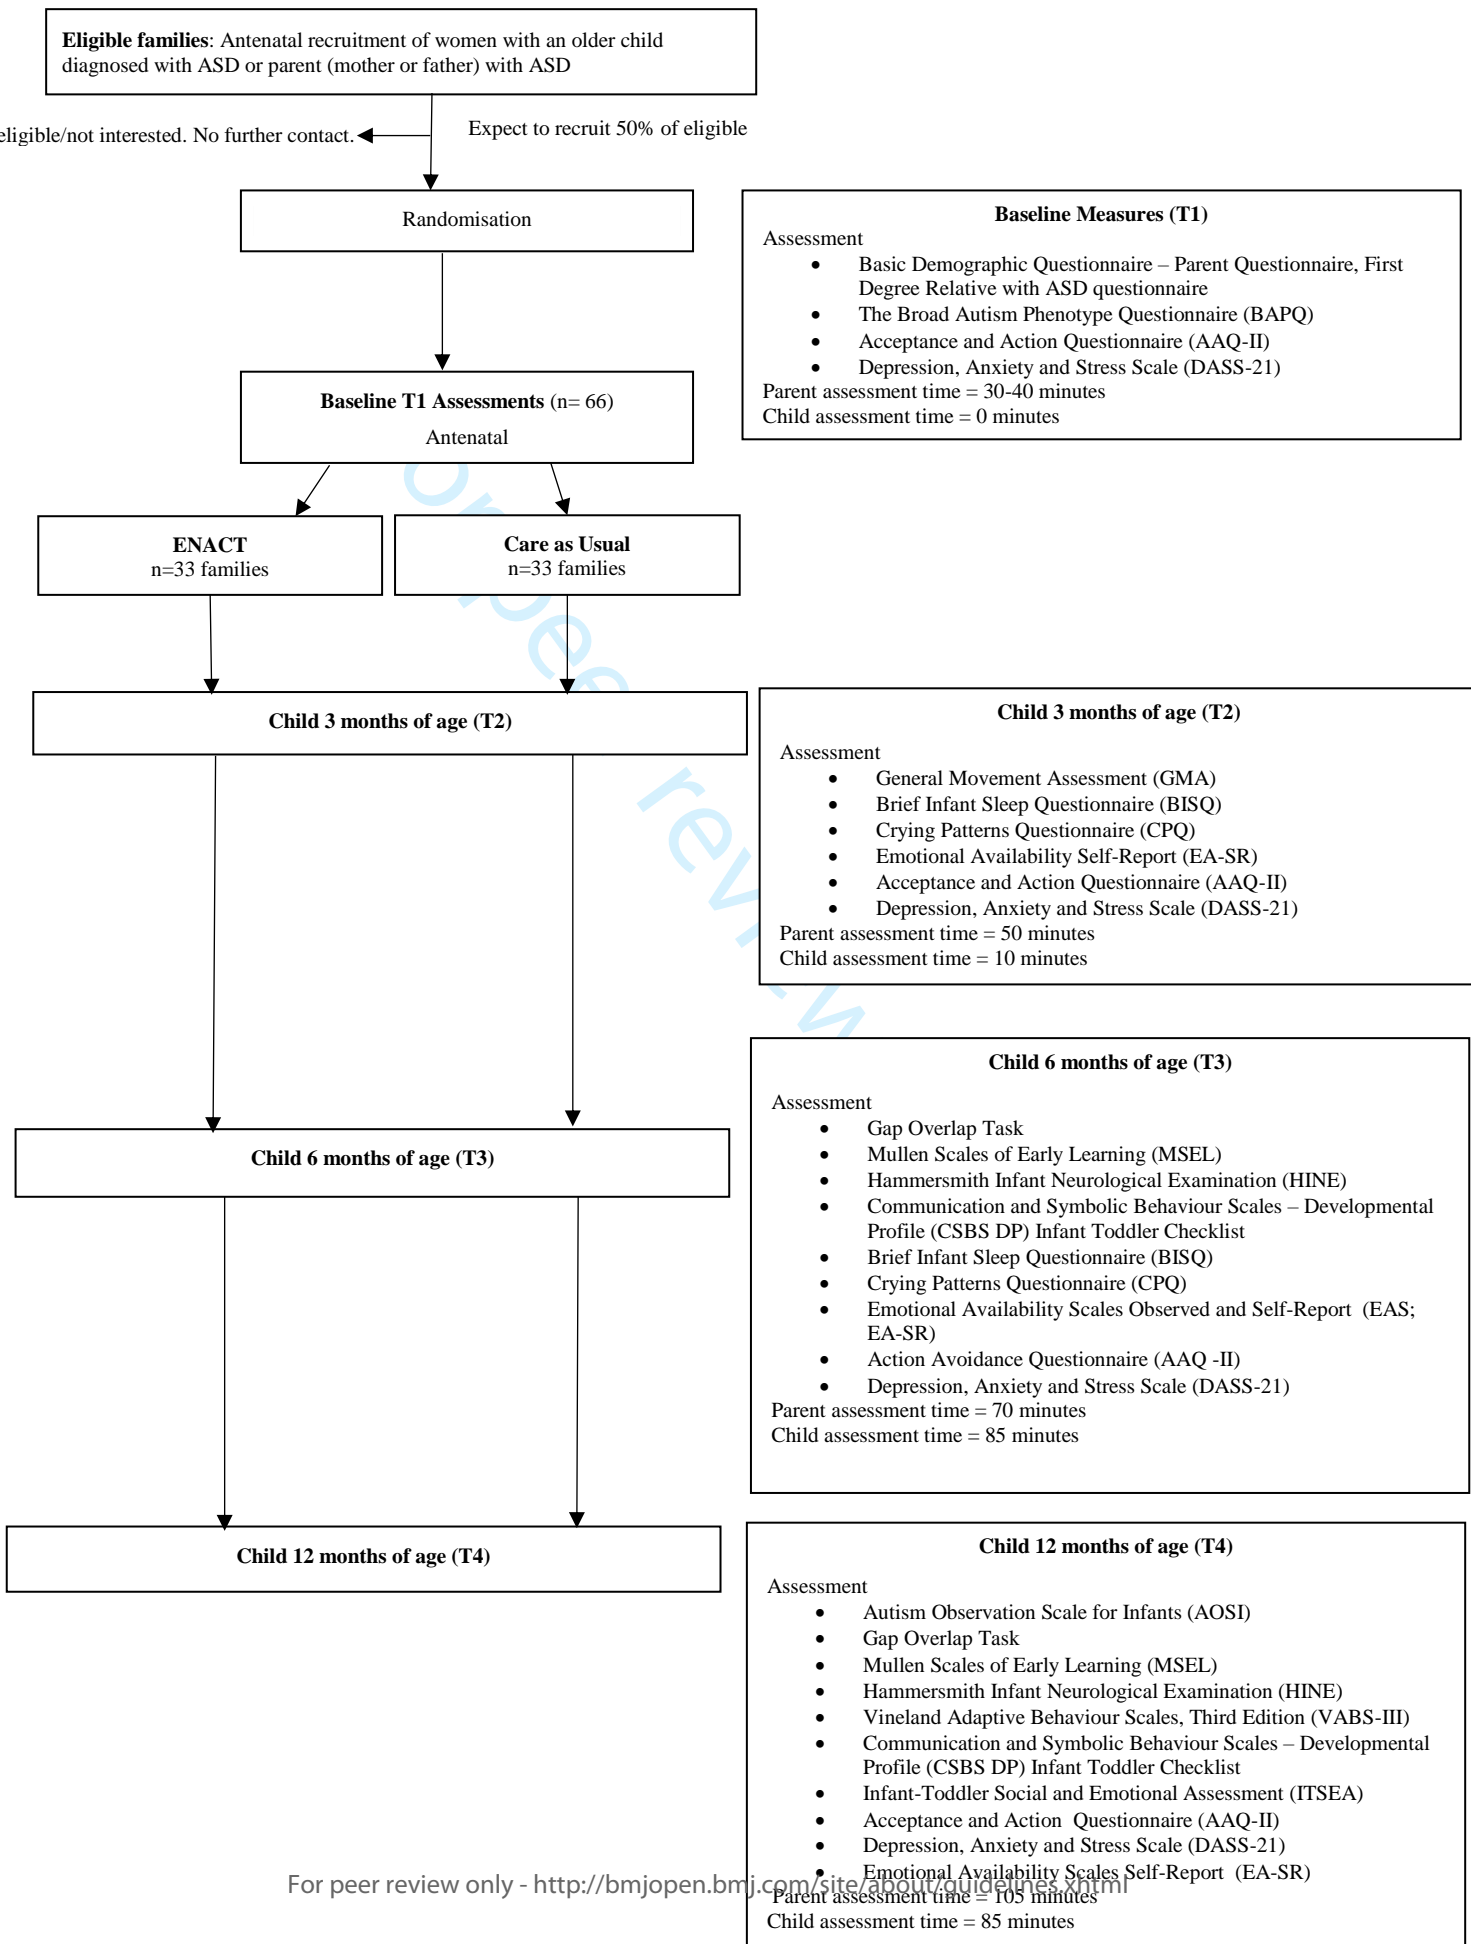

Centre for Children's Health Research (CCHR)  
Level 6, 62 Graham Street  
South Brisbane QLD 4101

Queensland Cerebral Palsy &  
Rehabilitation Research Centre  
(QCPRRC)  
Faculty of Medicine

## **PARENT/GUARDIAN INFORMATION SHEET**

**Ethics Approval:** HREC/19/QCHQ/50131, 2019000558

**Title of Project:** Environmental enrichment for infants; parenting with Acceptance and Commitment Therapy (**ENACT**)

**Chief Investigators:** Dr Koa Whittingham, Dr Andrea McGlade, Miss Kavindri Kulasinghe, Dr Amy Mitchell, Prof. Roslyn N. Boyd, Associate Professor Honey Heussler, Dr Kristelle Hudry

**Associate Investigator:** Dr Jacqui Barfoot

### **Thank you for taking the time to read this Information Sheet.**

This information statement and consent form is 7 pages long. Please make sure you have all the pages. These pages contain information about a research project that we are inviting you to take part in. **It is okay to say no if you would not like to participate in this study.** Please read this information carefully as it explains clearly and openly what participation involves. Before you decide, you can ask us any questions you have about the project. If you decide you would like to participate in this study then you need to sign and return the consent form attached.

### **What is the Research Project about?**

We have developed a new early intervention approach for infants who have an increased chance of having Autism Spectrum Disorders (ASD), targeting social interaction from the earliest months through parent-child interactions. We have integrated support for parental mental health and parenting challenges into this early intervention, and developed a means of delivering the intervention online through an e-course combined with online consultations. We are calling our early intervention approach 'Environmental Enrichment for Infants: Parenting with ACT', or 'ENACT'. The e-course we are trialing in this research project is called 'ENACT101'. This research project is about trialing ENACT with families of infants who have an increased chance of having of developing an Autism Spectrum Disorder (ASD). We are aiming to discover whether ENACT is effective and whether or not families find it useful.

### **Can I participate?**

You can participate in this study if you are **currently pregnant** with a **baby who has a first-degree relative (sibling or parent) with a diagnosis of an Autism Spectrum Disorder (ASD)**. This might mean that you, your baby's biological father, or your baby's sister or brother may have a diagnosis of an Autism Spectrum Disorder (ASD). As ENACT is delivered online, participation is restricted to families with **reliable internet access**. The intervention, ENACT, and the majority of assessments will be conducted via online questionnaires for your convenience. All participating families will **need to be able to travel to the Child Health Research Centre in Brisbane when their infant is 6 and 12 months of age** for their babies to have assessments in person.

## What does participating involve?

If you choose to participate in this study, you will be randomly allocated to one of two groups: ENACT or care-as-usual.

- ❖ **The ENACT group** will get immediate access to the ENACT101 e-course and online consultations with a clinician, who will answer any questions you might have and help to tailor the intervention to best meet your own individual needs and those of your baby. The ENACT intervention will include targeting your baby's social interaction from the earliest months during ordinary parent-child interactions. It also includes strategies to support your mental health and support you in coping with parenting challenges such as infant sleep. Our support for parental mental health is grounded in the psychological therapy Acceptance and Commitment Therapy (ACT). ENACT101 includes videos, text, questions and a discussion board.
- ❖ **The care-as-usual group** will receive their usual care without access to ENACT. This will allow us to determine if there are benefits to participating in ENACT.

Whether you are allocated to ENACT or to care-as-usual, you will still need to complete assessments **four times during the study: when you sign up and when your child is 3 months, 6 months, and 12 months old**. All of the assessments will include online questionnaires asking about family, feelings, wellbeing, and your relationship with your child, as well as your child's development.

At 3 months of age, you will be asked to record your baby's movements via the Baby Moves app, which we will ask you to download onto your phone. The Baby Moves app helps to record your baby's movements for the General Movements Assessment (GMA), which is a neurodevelopmental assessment tool. When your child is 6 months and 12 months old, we will ask you to bring your child for a visit to the **Centre for Children's Health Research in Brisbane** for a **comprehensive assessment of your baby's development with a developmental paediatrician. We will provide you with free parking.**

## Can I get a copy of the assessment results and find out about my baby's development?

Absolutely! We hope that this is one of the benefits of participating, whether you are in the intervention group or not. We know that finding out about your baby's development is important to you. All participating families will receive a developmental report after their baby's 12 month assessments. If earlier assessments indicate neurodevelopmental risk, particularly the general movements assessment at 3-4 months of age and the HINE at 6 months then you will be informed and assisted in finding appropriate support. All babies participating in the study will have a report provided to their parent/s after their last assessment and a copy will also go to your baby's general practitioner. If there are any findings of concern you will also be informed via the report and your general practitioner. As these assessments have been performed as part of a study, we cannot provide individual recommendations for management. The report will be able to make some general recommendations though for you to be able to discuss further with your general practitioner (or your child's paediatrician if they have one), so that you know what management options are available.

## Your involvement is genuinely appreciated.

Your active participation in refining ENACT is highly valued. We will ask you to share your thoughts and experiences with us as you work through the program.

The steps of the study participation are summarised below:

Queensland Cerebral Palsy &  
Rehabilitation Research Centre  
(QCPRRC)

- ✓ Agree to participate in the study and sign the consent form
- ✓ Complete baseline questionnaires online (*30-40 minutes*)
- ✓ Be randomly assigned to **ENACT** or **Care as Usual** group

### **ENACT101**

- ✓ e- course  
(*6-8 hours total over 8-10 weeks*)

- ✓ Early intervention for social reciprocity
- ✓ Supported by regular video conference sessions with clinician

### **Care as Usual**

- ✓ Your usual postnatal medical care

### **When your child is 3 months old**

- ✓ Complete questionnaires online  
*Parent assessment time = 50 minutes*  
*Child assessment time = 10 minutes*
- ✓ **Baby Moves app recording at 12 and 14 weeks**  
*Child assessment time = 5 minutes each recording*

### **When your child is 6 months old**

- ✓ Complete questionnaires online
- ✓ Record a **20 minute** interaction with your child
- ✓ **Complete assessments in Brisbane**  
*Parent assessment time = 70 minutes*  
*Child assessment time = 85 minutes*

### **When your child is 12 months old**

- ✓ Complete questionnaires online
  - ✓ Record a **20 minute** interaction with your child
  - ✓ **Complete assessments in Brisbane**
  - ✓ Get a comprehensive report of your child's developmental assessment
- Parent assessment time = 105 minutes*  
*Child assessment time = 85 minutes*

## **What does ENACT involve?**

ENACT101 is flexible online course, and participants will be able to move through the content at a pace that suits them. We estimate that it will take approximately 6-8 hours in total to complete the content, with most participants beginning antenatally. We aim to ensure that

participants have worked through all of the ENACT101 content by the time their infant is 8 weeks of age. ENACT101 can be accessed from any device that can connect to the internet.

The social interaction component of ENACT should be practiced regularly from when your infant is 2 weeks old, with a target of 30 minutes per day/5 days per week. However, the social interaction practice is designed to be done during ordinary, everyday activities and interactions with your baby, and shouldn't take up extra time in your day. The clinical consultations will support you in finding ways to practice ENACT in the midst of everyday life.

### **How will this research help people in the future?**

This is the first time an early intervention approach for ASD has been trialed from birth. With your help, we hope to refine ENACT. We have chosen to use an online delivery method, including the development of the e-course ENACT101, so that if ENACT is found to be effective, ENACT101 can be made accessible to families with children who have an increased chance of having Autism Spectrum Disorder across the world.

### **Are there any risks to participation?**

ENACT101 will be exploring your relationship with your newborn child as well as your thoughts, feelings and general well-being. This study contains no risks beyond everyday living.

### **Will my information be confidential?**

Yes! All information that we collect from you and your child, including your questionnaires, videoed parent-child interaction, child assessments and your feedback will be stored in a confidential manner. The information in this study will only be used in ways that will not reveal who you are. You will not be identified in any publication from this study or in any data files shared with other researchers. All information will be held in strict confidence, and will be used for statistical purposes only. Confidentiality will only be breached if a child is deemed at risk of harm or neglect. Data collected from you or your child will be de-identified, by replacing any identifying information (e.g. your name) with a participant number. Identified or de-identified research data may be made available for review by ethics review committees or other regulatory authorities for the purposes of monitoring ethical and scientific conduct of the study.

### **What if I change my mind?**

You do not have to take part in this research project. Your participation will not affect any treatment that you or your child receives. If you do agree to participate, and change your mind at a later date, you are free to withdraw from the study at any time without any negative consequence.

### **Who is involved?**

#### **Chief Investigators**

1. **Dr Koa Whittingham** is a clinical and developmental psychologist and a senior research fellow at the University of Queensland. She is experienced in working with parents of children with Autism Spectrum Disorder as well as in Acceptance and Commitment Therapy.
2. **Dr Andrea McGlade** is a developmental paediatrician and is undertaking this project as part of her PhD within the Faculty of Medicine at the University of Queensland.
3. **Miss Kavindri Kulasinghe** is a medical student within the Faculty of Medicine at the University of Queensland. She is undertaking this project as a part of her PhD.
4. **Dr Amy Mitchell** is a paediatric nurse and a research fellow at the University of Queensland with expertise in working with parents.

- 1  
2  
3  
4  
5  
6  
7  
8  
9  
10  
11  
12  
13  
14
5. **Professor Roslyn Boyd** is the Scientific Director of Queensland Cerebral Palsy and Rehabilitation Research Centre. She has clinical and scientific expertise in working with children with cerebral palsy and developmental delay and their families.
  6. **Associate Professor Honey Heussler** is a developmental and behavioural paediatrician and a researcher with the Centre for Children's Health Research. She has extensive experience working with children with developmental and behavioural problems.
  7. **Dr Kristelle Hudry** is a Senior Lecturer within the Department of Psychology and Counselling at the La Trobe University. She is experienced in working with parents of children with Autism Spectrum Disorder.

### Associate Investigators

- 15  
16  
17  
18  
19
1. **Dr Jacqui Barfoot** is an occupational therapist with clinical and research experience in parent-infant relationship focussed interventions to support infant development. She is the clinician delivering the ENACT intervention.

### Do you have any questions?

20  
21  
22

Please take the time to ask us any questions that you may have. You can contact:

23  
24  
25

Miss Kavindri Kulasinghe or Dr Andrea McGlade (Chief Investigators) on (07) 3069 7547 or email [uqenact@uq.edu.au](mailto:uqenact@uq.edu.au)

### University of Queensland Ethics Contact:

26  
27  
28  
29  
30  
31  
32  
33

This study adheres to the Guidelines of the ethical review process of The University of Queensland and the National Statement on Ethical Conduct in Human Research. Whilst you are free to discuss your participation in this study with project staff, if you would like to speak to an officer of the University not involved in the study, you may contact the Ethics Coordinators on (07) 33653924 / (07) 34431656, or email [humanethics@research.uq.edu.au](mailto:humanethics@research.uq.edu.au).

### HREC Information:

34  
35  
36  
37  
38  
39  
40  
41  
42  
43  
44  
45  
46  
47  
48  
49  
50  
51  
52  
53  
54  
55  
56  
57  
58  
59  
60

The Children's Health Queensland Hospital and Health Service Human Research Ethics Committee (HREC) has approved this study. If you have any concerns and/or complaints about the project, the way it is being conducted or your child's rights as a research participant, and would like to speak to someone independent of the project, please contact the HREC Coordinator on: 3069 7002 or email [CHOETHICS@health.qld.gov.au](mailto:CHOETHICS@health.qld.gov.au)

Centre for Children's Health Research (CCHR)  
Level 6, 62 Graham Street  
South Brisbane QLD 4101  
Tel: (07) 3646 5542

Queensland Cerebral Palsy &  
Rehabilitation Research Centre  
(QCPRRC)  
Faculty of Medicine

## PARTICIPANT CONSENT FORM

**Project Number:** HREC/19/QCHQ/50131, 2019000558

**Title of Project:** Environmental enrichment for infants; parenting with Acceptance and Commitment Therapy (ENACT)

**Chief Investigators:** Dr Koa Whittingham, Dr Andrea McGlade, Miss Kavindri Kulasinghe, Dr Amy Mitchell, Prof. Roslyn N. Boyd, Associate Professor Honey Heussler, Dr Kristelle Hudry

I/We,

voluntarily consent to participate in the above titled Research Project explained to me by:

Mrs/Ms/Dr/Professor \_\_\_\_\_

- I/We have read the information statement for this study and I/we believe I/we understand the purpose, extent and possible effects of my involvement.
- I/We have had an opportunity to ask questions and I/we am satisfied with the answers I/we have received.
- I/We understand information collected will be stored confidentially and my/our identity will not be revealed.
- I/We understand that I/we can refuse to participate and can withdraw from this study at any time without any negative consequence. In particular, I/we understand that my/our participation will not affect my child's access to usual medical care.
- I/We understand that the purpose of this study is to pilot an innovative, online approach to early intervention and that my/our active involvement, including critical feedback, is valued.
- I/We understand that in order to evaluate the new early intervention I/we will be asked to complete online questionnaires as well as record an ordinary parent-child interaction during the study.
- I/We consent to having videos of my/our child recorded via the Baby Moves app when my/our child is 12 and 14 weeks of age and scored by an independent assessor.
- I/We understand that I/we will receive a developmental report covering my baby's 12 month assessments and that if neurodevelopmental risk is found at the earlier assessments particularly on the general movements assessment or the HINE I/we will be informed as soon as possible.
- I/We understand that in order to evaluate the new early intervention I/we will be asked to complete a developmental assessment at the Children's Health Research Centre in Brisbane when my child is 6 and 12 months of age.
- I/We understand that a report of my child's developmental assessments will be provided at the completion of the assessments and that in the event of any adverse findings I may be contacted by a member of the assessment team to notify me of these findings.



- I/We consent to provide the name and contact details of my child’s General Practitioner and Paediatrician (if your child has a paediatrician).
- I/We consent for my nominated General Practitioner (and paediatrician) to be contacted and a report provided to them for further follow up with your child, including any concerns identified in the assessments performed.
- **I/We consent to participate in this research project.**

**My child’s GP or Paediatrician:**

**Name:** \_\_\_\_\_

**Address:** \_\_\_\_\_

**Phone:** \_\_\_\_\_

**Signature** \_\_\_\_\_ **Date** \_\_\_\_\_

I have explained this study and I believe that the participant/s understands the purpose, extent and possible effects of involvement.

**Researcher’s Signature** \_\_\_\_\_ **Date** \_\_\_\_\_

Note: All parties signing the Consent Form must date their own signature.

For peer review only

# Reporting checklist for protocol of a clinical trial.

Based on the SPIRIT guidelines.

## Instructions to authors

Complete this checklist by entering the page numbers from your manuscript where readers will find each of the items listed below.

Your article may not currently address all the items on the checklist. Please modify your text to include the missing information. If you are certain that an item does not apply, please write "n/a" and provide a short explanation.

Upload your completed checklist as an extra file when you submit to a journal.

In your methods section, say that you used the SPIRIT reporting guidelines, and cite them as:

Chan A-W, Tetzlaff JM, Altman DG, Laupacis A, Gøtzsche PC, Krleža-Jerić K, Hróbjartsson A, Mann H, Dickersin K, Berlin J, Doré C, Parulekar W, Summerskill W, Groves T, Schulz K, Sox H, Rockhold FW, Rennie D, Moher D. SPIRIT 2013 Statement: Defining standard protocol items for clinical trials. *Ann Intern Med.* 2013;158(3):200-207

|                                             |                     |                                                                                                              | Page<br>Number |
|---------------------------------------------|---------------------|--------------------------------------------------------------------------------------------------------------|----------------|
| <b>Administrative information</b>           |                     |                                                                                                              |                |
| Title                                       | <a href="#">#1</a>  | Descriptive title identifying the study design, population, interventions, and, if applicable, trial acronym | Title<br>page  |
| Trial registration                          | <a href="#">#2a</a> | Trial identifier and registry name. If not yet registered, name of intended registry                         | Title<br>page  |
| Trial registration: data set                | <a href="#">#2b</a> | All items from the World Health Organization Trial Registration Data Set                                     | Title<br>page  |
| Protocol version                            | <a href="#">#3</a>  | Date and version identifier                                                                                  | N/A            |
| Funding                                     | <a href="#">#4</a>  | Sources and types of financial, material, and other support                                                  | 15             |
| Roles and responsibilities: contributorship | <a href="#">#5a</a> | Names, affiliations, and roles of protocol contributors                                                      | Title<br>page  |

|    |                               |                      |                                                                                                |      |
|----|-------------------------------|----------------------|------------------------------------------------------------------------------------------------|------|
| 1  | Roles and                     | <a href="#">#5b</a>  | Name and contact information for the trial sponsor                                             | N/A  |
| 2  | responsibilities: sponsor     |                      |                                                                                                |      |
| 3  | contact information           |                      |                                                                                                |      |
| 4  |                               |                      |                                                                                                |      |
| 5  |                               |                      |                                                                                                |      |
| 6  | Roles and                     | <a href="#">#5c</a>  | Role of study sponsor and funders, if any, in study design; collection, management,            | N/A  |
| 7  | responsibilities: sponsor     |                      | analysis, and interpretation of data; writing of the report; and the decision to submit the    |      |
| 8  | and funder                    |                      | report for publication, including whether they will have ultimate authority over any of        |      |
| 9  |                               |                      | these activities                                                                               |      |
| 10 |                               |                      |                                                                                                |      |
| 11 |                               |                      |                                                                                                |      |
| 12 |                               |                      |                                                                                                |      |
| 13 | Roles and                     | <a href="#">#5d</a>  | Composition, roles, and responsibilities of the coordinating centre, steering committee,       | 15   |
| 14 | responsibilities:             |                      | endpoint adjudication committee, data management team, and other individuals or                |      |
| 15 | committees                    |                      | groups overseeing the trial, if applicable (see Item 21a for data monitoring committee)        |      |
| 16 |                               |                      |                                                                                                |      |
| 17 |                               |                      |                                                                                                |      |
| 18 |                               |                      |                                                                                                |      |
| 19 | <b>Introduction</b>           |                      |                                                                                                |      |
| 20 |                               |                      |                                                                                                |      |
| 21 | Background and                | <a href="#">#6a</a>  | Description of research question and justification for undertaking the trial, including        | 5-6  |
| 22 | rationale                     |                      | summary of relevant studies (published and unpublished) examining benefits and harms           |      |
| 23 |                               |                      | for each intervention                                                                          |      |
| 24 |                               |                      |                                                                                                |      |
| 25 |                               |                      |                                                                                                |      |
| 26 | Background and                | <a href="#">#6b</a>  | Explanation for choice of comparators                                                          | 6    |
| 27 | rationale: choice of          |                      |                                                                                                |      |
| 28 | comparators                   |                      |                                                                                                |      |
| 29 |                               |                      |                                                                                                |      |
| 30 |                               |                      |                                                                                                |      |
| 31 |                               |                      |                                                                                                |      |
| 32 | Objectives                    | <a href="#">#7</a>   | Specific objectives or hypotheses                                                              | 6-7  |
| 33 |                               |                      |                                                                                                |      |
| 34 | Trial design                  | <a href="#">#8</a>   | Description of trial design including type of trial (eg, parallel group, crossover, factorial, | 6-7  |
| 35 |                               |                      | single group), allocation ratio, and framework (eg, superiority, equivalence, non-             |      |
| 36 |                               |                      | inferiority, exploratory)                                                                      |      |
| 37 |                               |                      |                                                                                                |      |
| 38 |                               |                      |                                                                                                |      |
| 39 |                               |                      |                                                                                                |      |
| 40 | <b>Methods: Participants,</b> |                      |                                                                                                |      |
| 41 | <b>interventions, and</b>     |                      |                                                                                                |      |
| 42 | <b>outcomes</b>               |                      |                                                                                                |      |
| 43 |                               |                      |                                                                                                |      |
| 44 |                               |                      |                                                                                                |      |
| 45 | Study setting                 | <a href="#">#9</a>   | Description of study settings (eg, community clinic, academic hospital) and list of            | 8-9  |
| 46 |                               |                      | countries where data will be collected. Reference to where list of study sites can be          |      |
| 47 |                               |                      | obtained                                                                                       |      |
| 48 |                               |                      |                                                                                                |      |
| 49 |                               |                      |                                                                                                |      |
| 50 |                               |                      |                                                                                                |      |
| 51 | Eligibility criteria          | <a href="#">#10</a>  | Inclusion and exclusion criteria for participants. If applicable, eligibility criteria for     | 8    |
| 52 |                               |                      | study centres and individuals who will perform the interventions (eg, surgeons,                |      |
| 53 |                               |                      | psychotherapists)                                                                              |      |
| 54 |                               |                      |                                                                                                |      |
| 55 |                               |                      |                                                                                                |      |
| 56 | Interventions:                | <a href="#">#11a</a> | Interventions for each group with sufficient detail to allow replication, including how        | 9-10 |
| 57 | description                   |                      | and when they will be administered                                                             |      |
| 58 |                               |                      |                                                                                                |      |
| 59 |                               |                      |                                                                                                |      |
| 60 |                               |                      |                                                                                                |      |

|    |                              |                      |                                                                                             |          |
|----|------------------------------|----------------------|---------------------------------------------------------------------------------------------|----------|
| 1  | Interventions:               | <a href="#">#11b</a> | Criteria for discontinuing or modifying allocated interventions for a given trial           | N/A      |
| 2  | modifications                |                      | participant (eg, drug dose change in response to harms, participant request, or improving   |          |
| 3  |                              |                      | / worsening disease)                                                                        |          |
| 4  |                              |                      |                                                                                             |          |
| 5  |                              |                      |                                                                                             |          |
| 6  | Interventions: adherence     | <a href="#">#11c</a> | Strategies to improve adherence to intervention protocols, and any procedures for           | 10       |
| 7  |                              |                      | monitoring adherence (eg, drug tablet return; laboratory tests)                             |          |
| 8  |                              |                      |                                                                                             |          |
| 9  |                              |                      |                                                                                             |          |
| 10 | Interventions:               | <a href="#">#11d</a> | Relevant concomitant care and interventions that are permitted or prohibited during the     | 9        |
| 11 | concomitant care             |                      | trial                                                                                       |          |
| 12 |                              |                      |                                                                                             |          |
| 13 |                              |                      |                                                                                             |          |
| 14 | Outcomes                     | <a href="#">#12</a>  | Primary, secondary, and other outcomes, including the specific measurement variable         | 11-14    |
| 15 |                              |                      | (eg, systolic blood pressure), analysis metric (eg, change from baseline, final value, time |          |
| 16 |                              |                      | to event), method of aggregation (eg, median, proportion), and time point for each          |          |
| 17 |                              |                      | outcome. Explanation of the clinical relevance of chosen efficacy and harm outcomes is      |          |
| 18 |                              |                      | strongly recommended                                                                        |          |
| 19 |                              |                      |                                                                                             |          |
| 20 |                              |                      |                                                                                             |          |
| 21 |                              |                      |                                                                                             |          |
| 22 | Participant timeline         | <a href="#">#13</a>  | Time schedule of enrolment, interventions (including any run-ins and washouts),             | 17,      |
| 23 |                              |                      | assessments, and visits for participants. A schematic diagram is highly recommended         | figure 1 |
| 24 |                              |                      | (see Figure)                                                                                |          |
| 25 |                              |                      |                                                                                             |          |
| 26 |                              |                      |                                                                                             |          |
| 27 |                              |                      |                                                                                             |          |
| 28 | Sample size                  | <a href="#">#14</a>  | Estimated number of participants needed to achieve study objectives and how it was          | 8        |
| 29 |                              |                      | determined, including clinical and statistical assumptions supporting any sample size       |          |
| 30 |                              |                      | calculations                                                                                |          |
| 31 |                              |                      |                                                                                             |          |
| 32 |                              |                      |                                                                                             |          |
| 33 | Recruitment                  | <a href="#">#15</a>  | Strategies for achieving adequate participant enrolment to reach target sample size         | 8        |
| 34 |                              |                      |                                                                                             |          |
| 35 |                              |                      |                                                                                             |          |
| 36 | <b>Methods: Assignment</b>   |                      |                                                                                             |          |
| 37 | <b>of interventions (for</b> |                      |                                                                                             |          |
| 38 | <b>controlled trials)</b>    |                      |                                                                                             |          |
| 39 |                              |                      |                                                                                             |          |
| 40 |                              |                      |                                                                                             |          |
| 41 | Allocation: sequence         | <a href="#">#16a</a> | Method of generating the allocation sequence (eg, computer-generated random                 | 10-11    |
| 42 | generation                   |                      | numbers), and list of any factors for stratification. To reduce predictability of a random  |          |
| 43 |                              |                      | sequence, details of any planned restriction (eg, blocking) should be provided in a         |          |
| 44 |                              |                      | separate document that is unavailable to those who enrol participants or assign             |          |
| 45 |                              |                      | interventions                                                                               |          |
| 46 |                              |                      |                                                                                             |          |
| 47 |                              |                      |                                                                                             |          |
| 48 |                              |                      |                                                                                             |          |
| 49 |                              |                      |                                                                                             |          |
| 50 |                              | <a href="#">#16b</a> | Mechanism of implementing the allocation sequence (eg, central telephone; sequentially      | 10-11    |
| 51 |                              |                      | numbered, opaque, sealed envelopes), describing any steps to conceal the sequence until     |          |
| 52 |                              |                      | interventions are assigned                                                                  |          |
| 53 |                              |                      |                                                                                             |          |
| 54 |                              |                      |                                                                                             |          |
| 55 | Allocation:                  | <a href="#">#16c</a> | Who will generate the allocation sequence, who will enrol participants, and who will        | 10-11    |
| 56 | implementation               |                      | assign participants to interventions                                                        |          |
| 57 |                              |                      |                                                                                             |          |
| 58 |                              |                      |                                                                                             |          |
| 59 |                              |                      |                                                                                             |          |
| 60 |                              |                      |                                                                                             |          |

|    |                            |                      |                                                                                                                                                                                                                                                                                                                                                                                                              |       |
|----|----------------------------|----------------------|--------------------------------------------------------------------------------------------------------------------------------------------------------------------------------------------------------------------------------------------------------------------------------------------------------------------------------------------------------------------------------------------------------------|-------|
| 1  | Blinding (masking)         | <a href="#">#17a</a> | Who will be blinded after assignment to interventions (eg, trial participants, care providers, outcome assessors, data analysts), and how                                                                                                                                                                                                                                                                    | N/A   |
| 2  |                            |                      |                                                                                                                                                                                                                                                                                                                                                                                                              |       |
| 3  |                            |                      |                                                                                                                                                                                                                                                                                                                                                                                                              |       |
| 4  | Blinding (masking):        | <a href="#">#17b</a> | If blinded, circumstances under which unblinding is permissible, and procedure for                                                                                                                                                                                                                                                                                                                           | N/A   |
| 5  | emergency unblinding       |                      | revealing a participant's allocated intervention during the trial                                                                                                                                                                                                                                                                                                                                            |       |
| 6  |                            |                      |                                                                                                                                                                                                                                                                                                                                                                                                              |       |
| 7  |                            |                      |                                                                                                                                                                                                                                                                                                                                                                                                              |       |
| 8  |                            |                      |                                                                                                                                                                                                                                                                                                                                                                                                              |       |
| 9  | <b>Methods: Data</b>       |                      |                                                                                                                                                                                                                                                                                                                                                                                                              |       |
| 10 | <b>collection,</b>         |                      |                                                                                                                                                                                                                                                                                                                                                                                                              |       |
| 11 | <b>management, and</b>     |                      |                                                                                                                                                                                                                                                                                                                                                                                                              |       |
| 12 | <b>analysis</b>            |                      |                                                                                                                                                                                                                                                                                                                                                                                                              |       |
| 13 |                            |                      |                                                                                                                                                                                                                                                                                                                                                                                                              |       |
| 14 |                            |                      |                                                                                                                                                                                                                                                                                                                                                                                                              |       |
| 15 | Data collection plan       | <a href="#">#18a</a> | Plans for assessment and collection of outcome, baseline, and other trial data, including any related processes to promote data quality (eg, duplicate measurements, training of assessors) and a description of study instruments (eg, questionnaires, laboratory tests) along with their reliability and validity, if known. Reference to where data collection forms can be found, if not in the protocol | 11-14 |
| 16 |                            |                      |                                                                                                                                                                                                                                                                                                                                                                                                              |       |
| 17 |                            |                      |                                                                                                                                                                                                                                                                                                                                                                                                              |       |
| 18 |                            |                      |                                                                                                                                                                                                                                                                                                                                                                                                              |       |
| 19 |                            |                      |                                                                                                                                                                                                                                                                                                                                                                                                              |       |
| 20 |                            |                      |                                                                                                                                                                                                                                                                                                                                                                                                              |       |
| 21 |                            |                      |                                                                                                                                                                                                                                                                                                                                                                                                              |       |
| 22 |                            |                      |                                                                                                                                                                                                                                                                                                                                                                                                              |       |
| 23 |                            |                      |                                                                                                                                                                                                                                                                                                                                                                                                              |       |
| 24 | Data collection plan:      | <a href="#">#18b</a> | Plans to promote participant retention and complete follow-up, including list of any                                                                                                                                                                                                                                                                                                                         | 14    |
| 25 | retention                  |                      | outcome data to be collected for participants who discontinue or deviate from intervention protocols                                                                                                                                                                                                                                                                                                         |       |
| 26 |                            |                      |                                                                                                                                                                                                                                                                                                                                                                                                              |       |
| 27 |                            |                      |                                                                                                                                                                                                                                                                                                                                                                                                              |       |
| 28 |                            |                      |                                                                                                                                                                                                                                                                                                                                                                                                              |       |
| 29 | Data management            | <a href="#">#19</a>  | Plans for data entry, coding, security, and storage, including any related processes to promote data quality (eg, double data entry; range checks for data values). Reference to where details of data management procedures can be found, if not in the protocol                                                                                                                                            | 14    |
| 30 |                            |                      |                                                                                                                                                                                                                                                                                                                                                                                                              |       |
| 31 |                            |                      |                                                                                                                                                                                                                                                                                                                                                                                                              |       |
| 32 |                            |                      |                                                                                                                                                                                                                                                                                                                                                                                                              |       |
| 33 |                            |                      |                                                                                                                                                                                                                                                                                                                                                                                                              |       |
| 34 |                            |                      |                                                                                                                                                                                                                                                                                                                                                                                                              |       |
| 35 | Statistics: outcomes       | <a href="#">#20a</a> | Statistical methods for analysing primary and secondary outcomes. Reference to where other details of the statistical analysis plan can be found, if not in the protocol                                                                                                                                                                                                                                     | 15    |
| 36 |                            |                      |                                                                                                                                                                                                                                                                                                                                                                                                              |       |
| 37 |                            |                      |                                                                                                                                                                                                                                                                                                                                                                                                              |       |
| 38 |                            |                      |                                                                                                                                                                                                                                                                                                                                                                                                              |       |
| 39 | Statistics: additional     | <a href="#">#20b</a> | Methods for any additional analyses (eg, subgroup and adjusted analyses)                                                                                                                                                                                                                                                                                                                                     | N/A   |
| 40 | analyses                   |                      |                                                                                                                                                                                                                                                                                                                                                                                                              |       |
| 41 |                            |                      |                                                                                                                                                                                                                                                                                                                                                                                                              |       |
| 42 |                            |                      |                                                                                                                                                                                                                                                                                                                                                                                                              |       |
| 43 | Statistics: analysis       | <a href="#">#20c</a> | Definition of analysis population relating to protocol non-adherence (eg, as randomised analysis), and any statistical methods to handle missing data (eg, multiple imputation)                                                                                                                                                                                                                              | N/A   |
| 44 | population and missing     |                      |                                                                                                                                                                                                                                                                                                                                                                                                              |       |
| 45 | data                       |                      |                                                                                                                                                                                                                                                                                                                                                                                                              |       |
| 46 |                            |                      |                                                                                                                                                                                                                                                                                                                                                                                                              |       |
| 47 |                            |                      |                                                                                                                                                                                                                                                                                                                                                                                                              |       |
| 48 | <b>Methods: Monitoring</b> |                      |                                                                                                                                                                                                                                                                                                                                                                                                              |       |
| 49 |                            |                      |                                                                                                                                                                                                                                                                                                                                                                                                              |       |
| 50 | Data monitoring: formal    | <a href="#">#21a</a> | Composition of data monitoring committee (DMC); summary of its role and reporting structure; statement of whether it is independent from the sponsor and competing interests; and reference to where further details about its charter can be found, if not in the protocol. Alternatively, an explanation of why a DMC is not needed                                                                        | 15    |
| 51 | committee                  |                      |                                                                                                                                                                                                                                                                                                                                                                                                              |       |
| 52 |                            |                      |                                                                                                                                                                                                                                                                                                                                                                                                              |       |
| 53 |                            |                      |                                                                                                                                                                                                                                                                                                                                                                                                              |       |
| 54 |                            |                      |                                                                                                                                                                                                                                                                                                                                                                                                              |       |
| 55 |                            |                      |                                                                                                                                                                                                                                                                                                                                                                                                              |       |
| 56 |                            |                      |                                                                                                                                                                                                                                                                                                                                                                                                              |       |
| 57 |                            |                      |                                                                                                                                                                                                                                                                                                                                                                                                              |       |
| 58 |                            |                      |                                                                                                                                                                                                                                                                                                                                                                                                              |       |
| 59 |                            |                      |                                                                                                                                                                                                                                                                                                                                                                                                              |       |
| 60 |                            |                      |                                                                                                                                                                                                                                                                                                                                                                                                              |       |

|    |                          |                      |                                                                                             |       |
|----|--------------------------|----------------------|---------------------------------------------------------------------------------------------|-------|
| 1  | Data monitoring: interim | <a href="#">#21b</a> | Description of any interim analyses and stopping guidelines, including who will have        | N/A   |
| 2  | analysis                 |                      | access to these interim results and make the final decision to terminate the trial          |       |
| 3  |                          |                      |                                                                                             |       |
| 4  |                          |                      |                                                                                             |       |
| 5  | Harms                    | <a href="#">#22</a>  | Plans for collecting, assessing, reporting, and managing solicited and spontaneously        | 15    |
| 6  |                          |                      | reported adverse events and other unintended effects of trial interventions or trial        |       |
| 7  |                          |                      | conduct                                                                                     |       |
| 8  |                          |                      |                                                                                             |       |
| 9  |                          |                      |                                                                                             |       |
| 10 | Auditing                 | <a href="#">#23</a>  | Frequency and procedures for auditing trial conduct, if any, and whether the process will   | N/A   |
| 11 |                          |                      | be independent from investigators and the sponsor                                           |       |
| 12 |                          |                      |                                                                                             |       |
| 13 |                          |                      |                                                                                             |       |
| 14 | <b>Ethics and</b>        |                      |                                                                                             |       |
| 15 | <b>dissemination</b>     |                      |                                                                                             |       |
| 16 |                          |                      |                                                                                             |       |
| 17 |                          |                      |                                                                                             |       |
| 18 | Research ethics approval | <a href="#">#24</a>  | Plans for seeking research ethics committee / institutional review board (REC / IRB)        | 15    |
| 19 |                          |                      | approval                                                                                    |       |
| 20 |                          |                      |                                                                                             |       |
| 21 |                          |                      |                                                                                             |       |
| 22 | Protocol amendments      | <a href="#">#25</a>  | Plans for communicating important protocol modifications (eg, changes to eligibility        | N/A   |
| 23 |                          |                      | criteria, outcomes, analyses) to relevant parties (eg, investigators, REC / IRBs, trial     |       |
| 24 |                          |                      | participants, trial registries, journals, regulators)                                       |       |
| 25 |                          |                      |                                                                                             |       |
| 26 |                          |                      |                                                                                             |       |
| 27 | Consent or assent        | <a href="#">#26a</a> | Who will obtain informed consent or assent from potential trial participants or             | 10-11 |
| 28 |                          |                      | authorised surrogates, and how (see Item 32)                                                |       |
| 29 |                          |                      |                                                                                             |       |
| 30 |                          |                      |                                                                                             |       |
| 31 | Consent or assent:       | <a href="#">#26b</a> | Additional consent provisions for collection and use of participant data and biological     | N/A   |
| 32 | ancillary studies        |                      | specimens in ancillary studies, if applicable                                               |       |
| 33 |                          |                      |                                                                                             |       |
| 34 |                          |                      |                                                                                             |       |
| 35 | Confidentiality          | <a href="#">#27</a>  | How personal information about potential and enrolled participants will be collected,       | 15    |
| 36 |                          |                      | shared, and maintained in order to protect confidentiality before, during, and after the    |       |
| 37 |                          |                      | trial                                                                                       |       |
| 38 |                          |                      |                                                                                             |       |
| 39 |                          |                      |                                                                                             |       |
| 40 |                          |                      |                                                                                             |       |
| 41 | Declaration of interests | <a href="#">#28</a>  | Financial and other competing interests for principal investigators for the overall trial   | N/A   |
| 42 |                          |                      | and each study site                                                                         |       |
| 43 |                          |                      |                                                                                             |       |
| 44 |                          |                      |                                                                                             |       |
| 45 | Data access              | <a href="#">#29</a>  | Statement of who will have access to the final trial dataset, and disclosure of contractual | 14    |
| 46 |                          |                      | agreements that limit such access for investigators                                         |       |
| 47 |                          |                      |                                                                                             |       |
| 48 |                          |                      |                                                                                             |       |
| 49 | Ancillary and post trial | <a href="#">#30</a>  | Provisions, if any, for ancillary and post-trial care, and for compensation to those who    | N/A   |
| 50 | care                     |                      | suffer harm from trial participation                                                        |       |
| 51 |                          |                      |                                                                                             |       |
| 52 | Dissemination policy:    | <a href="#">#31a</a> | Plans for investigators and sponsor to communicate trial results to participants,           | 15    |
| 53 | trial results            |                      | healthcare professionals, the public, and other relevant groups (eg, via publication,       |       |
| 54 |                          |                      | reporting in results databases, or other data sharing arrangements), including any          |       |
| 55 |                          |                      | publication restrictions                                                                    |       |
| 56 |                          |                      |                                                                                             |       |
| 57 |                          |                      |                                                                                             |       |
| 58 |                          |                      |                                                                                             |       |
| 59 |                          |                      |                                                                                             |       |
| 60 |                          |                      |                                                                                             |       |

|   |                       |                      |                                                                                                |     |
|---|-----------------------|----------------------|------------------------------------------------------------------------------------------------|-----|
| 1 | Dissemination policy: | <a href="#">#31b</a> | Authorship eligibility guidelines and any intended use of professional writers                 | N/A |
| 2 | authorship            |                      |                                                                                                |     |
| 3 |                       |                      |                                                                                                |     |
| 4 |                       |                      |                                                                                                |     |
| 5 | Dissemination policy: | <a href="#">#31c</a> | Plans, if any, for granting public access to the full protocol, participant-level dataset, and | N/A |
| 6 | reproducible research |                      | statistical code                                                                               |     |
| 7 |                       |                      |                                                                                                |     |

## 8 9 Appendices

|    |                      |                     |                                                                                                |     |
|----|----------------------|---------------------|------------------------------------------------------------------------------------------------|-----|
| 10 |                      |                     |                                                                                                |     |
| 11 | Informed consent     | <a href="#">#32</a> | Model consent form and other related documentation given to participants and                   | N/A |
| 12 | materials            |                     | authorised surrogates                                                                          |     |
| 13 |                      |                     |                                                                                                |     |
| 14 |                      |                     |                                                                                                |     |
| 15 | Biological specimens | <a href="#">#33</a> | Plans for collection, laboratory evaluation, and storage of biological specimens for           | N/A |
| 16 |                      |                     | genetic or molecular analysis in the current trial and for future use in ancillary studies, if |     |
| 17 |                      |                     | applicable                                                                                     |     |
| 18 |                      |                     |                                                                                                |     |
| 19 |                      |                     |                                                                                                |     |

20 None The SPIRIT checklist is distributed under the terms of the Creative Commons Attribution License CC-BY-ND 3.0. This checklist  
21 can be completed online using <https://www.goodreports.org/>, a tool made by the [EQUATOR Network](#) in collaboration with [Penelope.ai](#)  
22  
23  
24  
25  
26  
27  
28  
29  
30  
31  
32  
33  
34  
35  
36  
37  
38  
39  
40  
41  
42  
43  
44  
45  
46  
47  
48  
49  
50  
51  
52  
53  
54  
55  
56  
57  
58  
59  
60
